# Supplementary material for: Tuning the donating strength of dye sensitizers using molecular electrostatic potential analysis
Source: Royal Society of Chemistry journal article supplement (doi:10.1039/d0nj04797j), 2020-11-23
Supplement: d0nj04797j1.pdf [file d0nj04797j1.pdf]

## Supporting Information

### Tuning the donating strength of dye sensitizers using molecular electrostatic potential analysis

Velayudhan V. Divya,<sup>ab</sup> and Cherumuttathu H. Suresh<sup>ab\*</sup>

<sup>a</sup> Chemical Sciences and Technology Division, CSIR-National Institute for Interdisciplinary Science and Technology, Thiruvananthapuram, Kerala 695 019, <sup>b</sup> Academy of Scientific and Innovative Research (AcSIR), Ghaziabad 201002, India.

#### Table of contents

|                                                                                                                                        |           |
|----------------------------------------------------------------------------------------------------------------------------------------|-----------|
| Fig. S1 Correlation between donating strength $\Delta V_{mA}$ and open-circuit voltage $eV_{oc}$ of six different D- $\pi$ -A systems. | S2        |
| Fig. S2 Labeled bonds employed to calculate the BLA index.                                                                             | S3        |
| Fig S3. Correlation between $\Delta V_{mD}$ and $\Delta V_{mA}$ .                                                                      | S5        |
| Table S1. BLA index for the unsubstituted D1 – D6- $\pi$ -A systems in the ground state with B3LYP and CAM-B3LYP functional.           | S4        |
| Table S2. BLA index for the TPA based $\pi$ -A systems in S0 and S1 states at CAM-B3LYP/cc-pVDZ level.                                 | S4        |
| Table S3. Cartesian coordinates of B3LYP/cc-pVDZ geometries of D1 based donor systems.                                                 | S5 – S9   |
| Table S4. Cartesian coordinates of B3LYP/cc-pVDZ geometries of D2 based donor systems.                                                 | S9 – S15  |
| Table S5. Cartesian coordinates of B3LYP/cc-pVDZ geometries of D3 based donor systems.                                                 | S15- S22  |
| Table S6. Cartesian coordinates of B3LYP/cc-pVDZ geometries of D4 based donor systems.                                                 | S22 – S27 |
| Table S7. Cartesian coordinates of B3LYP/cc-pVDZ geometries of D5 based donor systems.                                                 | S27 – S33 |
| Table S8. Cartesian coordinates of B3LYP/cc-pVDZ geometries of D6 based donor systems.                                                 | S34- S38  |
| Table S9. Cartesian coordinates of B3LYP/cc-pVDZ geometries of benzene based D- $\pi$ -A systems.                                      | S38 – S44 |
| Table S10. Cartesian coordinates of B3LYP/cc-pVDZ geometries of pyrene D- $\pi$ -A systems.                                            | S44 – S52 |
| Table S11. Cartesian coordinates of B3LYP/cc-pVDZ geometries of TPA based D- $\pi$ -A systems.                                         | S53 – S62 |
| Table S12. Cartesian coordinates of B3LYP/cc-pVDZ geometries of carbazole based D- $\pi$ -A systems.                                   | S62 – S70 |

Table S13. Cartesian coordinates of B3LYP/cc-pVDZ geometries of phenothiazine based D- $\pi$ -A sytems. S70– S78

Table S14. Cartesian coordinates of B3LYP/cc-pVDZ geometries of coumarin based D- $\pi$ -A sytems. S79 – S85

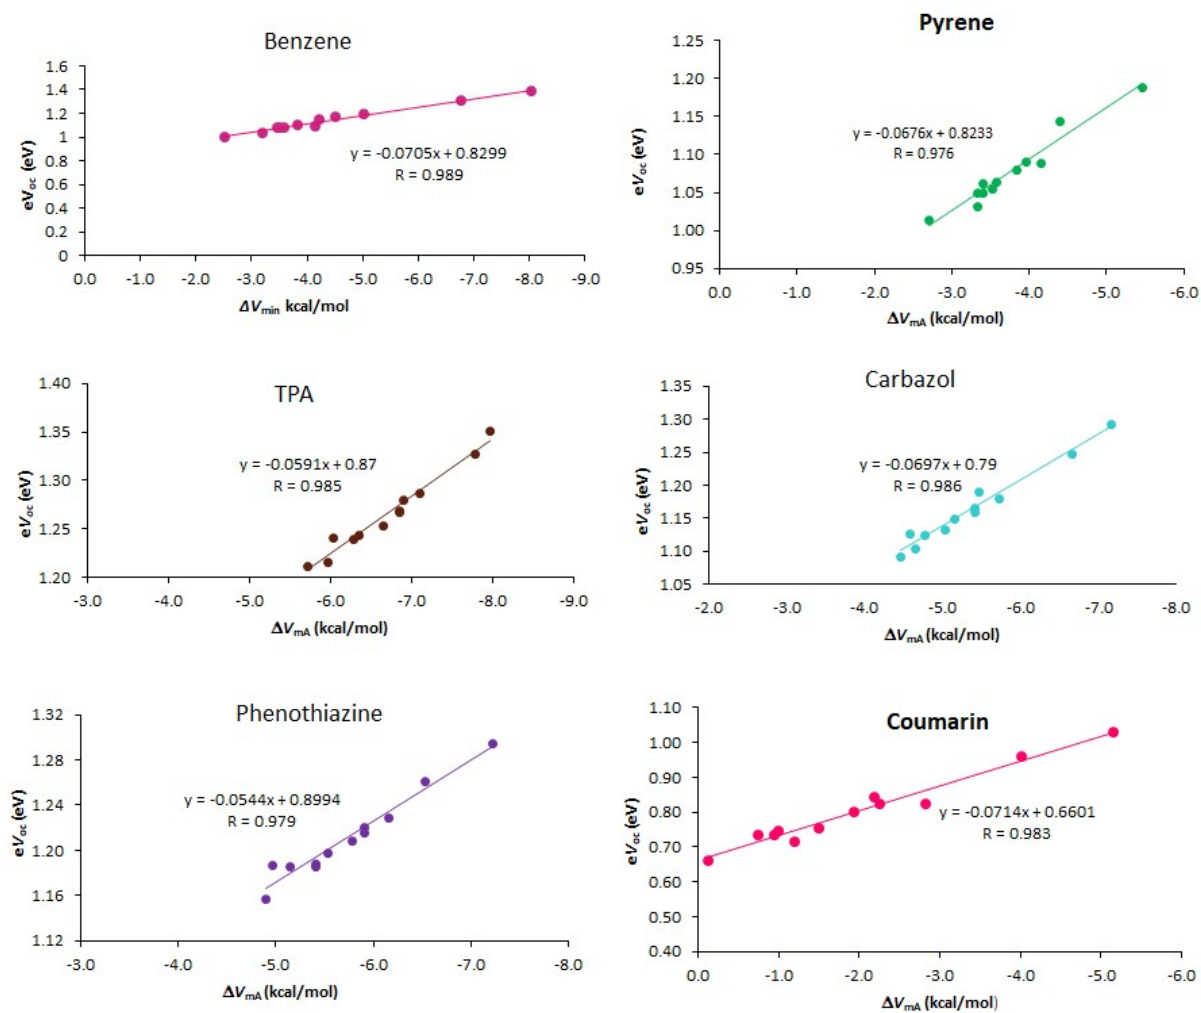

**Fig. S1** Correlation between donating strength  $\Delta V_{mA}$  and open-circuit voltage  $eV_{OC}$  of six different D- $\pi$ -A systems.

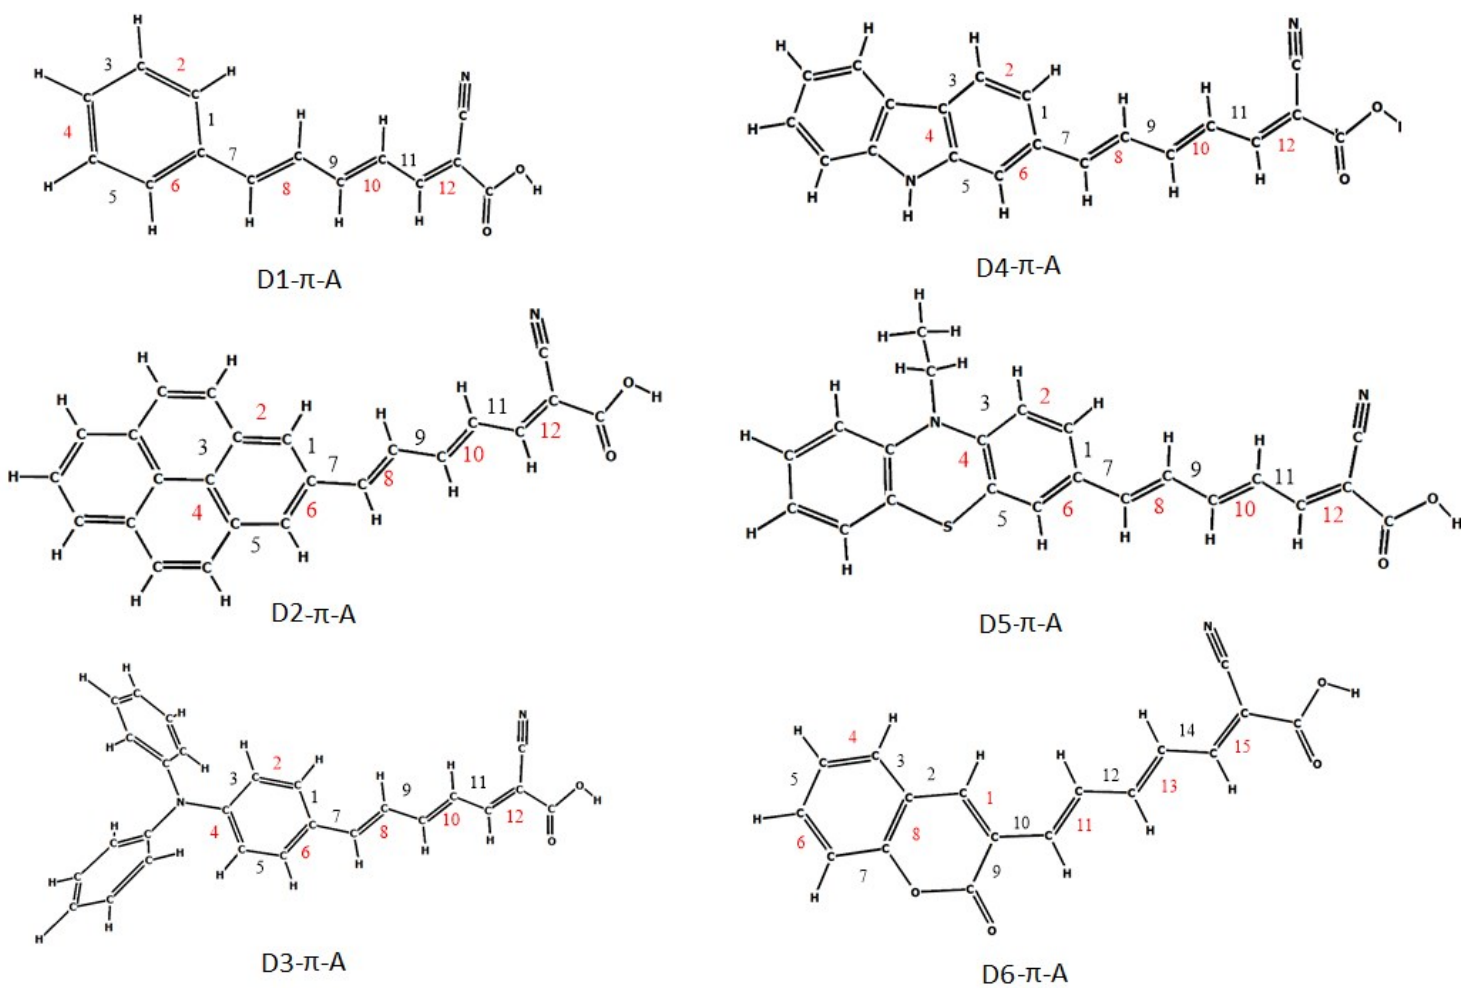

**Fig. S2** Labeled bonds employed to calculate the BLA index.

**Table S1.** BLA index for the unsubstituted D1 – D6- $\pi$ -A systems in ground state with B3LYP and CAM-B3LYP functional.

| Bond | D1- $\pi$ -A |           | D2- $\pi$ -A |           | D3- $\pi$ -A |           | D4- $\pi$ -A |           | D5- $\pi$ -A |           | D6- $\pi$ -A |           |
|------|--------------|-----------|--------------|-----------|--------------|-----------|--------------|-----------|--------------|-----------|--------------|-----------|
|      | S0           | S0        |
|      | B3LYP        | CAM-B3LYP |
| BLA  | 0.039        | 0.046     | 0.039        | 0.043     | 0.035        | 0.046     | 0.036        | 0.048     | 0.034        | 0.045     | 0.035        | 0.039     |
| 1    | 1.413        | 1.404     | 1.410        | 1.400     | 1.415        | 1.405     | 1.423        | 1.415     | 1.409        | 1.399     | 1.37         | 1.357     |
| 2    | 1.392        | 1.388     | 1.400        | 1.397     | 1.386        | 1.383     | 1.387        | 1.383     | 1.389        | 1.386     | 1.432        | 1.436     |
| 3    | 1.401        | 1.395     | 1.432        | 1.420     | 1.415        | 1.406     | 1.406        | 1.399     | 1.414        | 1.406     | 1.413        | 1.405     |
| 4    | 1.398        | 1.391     | 1.429        | 1.423     | 1.411        | 1.402     | 1.424        | 1.413     | 1.417        | 1.408     | 1.388        | 1.383     |
| 5    | 1.395        | 1.39      | 1.402        | 1.394     | 1.389        | 1.386     | 1.394        | 1.392     | 1.391        | 1.387     | 1.406        | 1.401     |
| 6    | 1.411        | 1.402     | 1.409        | 1.402     | 1.412        | 1.402     | 1.409        | 1.399     | 1.412        | 1.402     | 1.393        | 1.387     |
| 7    | 1.460        | 1.464     | 1.460        | 1.464     | 1.451        | 1.457     | 1.456        | 1.461     | 1.452        | 1.458     | 1.397        | 1.392     |
| 8    | 1.360        | 1.347     | 1.360        | 1.348     | 1.364        | 1.35      | 1.362        | 1.349     | 1.363        | 1.349     | 1.411        | 1.400     |
| 9    | 1.435        | 1.422     | 1.435        | 1.422     | 1.431        | 1.439     | 1.433        | 1.441     | 1.432        | 1.440     | 1.482        | 1.479     |
| 10   | 1.366        | 1.353     | 1.367        | 1.353     | 1.369        | 1.355     | 1.368        | 1.354     | 1.369        | 1.354     | 1.454        | 1.459     |
| 11   | 1.429        | 1.435     | 1.428        | 1.435     | 1.425        | 1.432     | 1.427        | 1.434     | 1.426        | 1.433     | 1.361        | 1.347     |
| 12   | 1.370        | 1.356     | 1.370        | 1.356     | 1.372        | 1.358     | 1.371        | 1.357     | 1.372        | 1.357     | 1.435        | 1.422     |
| 13   |              |           |              |           |              |           |              |           |              |           | 1.367        | 1.352     |
| 14   |              |           |              |           |              |           |              |           |              |           | 1.429        | 1.436     |
| 15   |              |           |              |           |              |           |              |           |              |           | 1.369        | 1.356     |

**Table S2.** BLA index for the TPA (D3) based  $\pi$ -A systems in S0 and S1 states at CAM-B3LYP/cc-pVDZ level.

| S0 equilibrium at CAM-B3LYP/cc-pVDZ |     |       | S1 equilibrium at CAM-B3LYP/cc-pVDZ |                    |       |
|-------------------------------------|-----|-------|-------------------------------------|--------------------|-------|
| Bond                                | BLA | D3    | D3                                  | D3-CH <sub>3</sub> | D3-OH |
|                                     |     | 0.046 | 0.010                               | 0.011              | 0.011 |
| 1                                   |     | 1.405 | 1.428                               | 1.426              | 1.428 |
| 2                                   |     | 1.383 | 1.373                               | 1.372              | 1.373 |
| 3                                   |     | 1.406 | 1.415                               | 1.418              | 1.414 |
| 4                                   |     | 1.402 | 1.418                               | 1.415              | 1.417 |
| 5                                   |     | 1.386 | 1.372                               | 1.373              | 1.373 |
| 6                                   |     | 1.402 | 1.426                               | 1.428              | 1.425 |
| 7                                   |     | 1.457 | 1.421                               | 1.421              | 1.423 |
| 8                                   |     | 1.35  | 1.39                                | 1.389              | 1.388 |
| 9                                   |     | 1.439 | 1.404                               | 1.404              | 1.405 |
| 10                                  |     | 1.355 | 1.390                               | 1.390              | 1.389 |
| 11                                  |     | 1.432 | 1.403                               | 1.404              | 1.404 |
| 12                                  |     | 1.358 | 1.388                               | 1.388              | 1.388 |

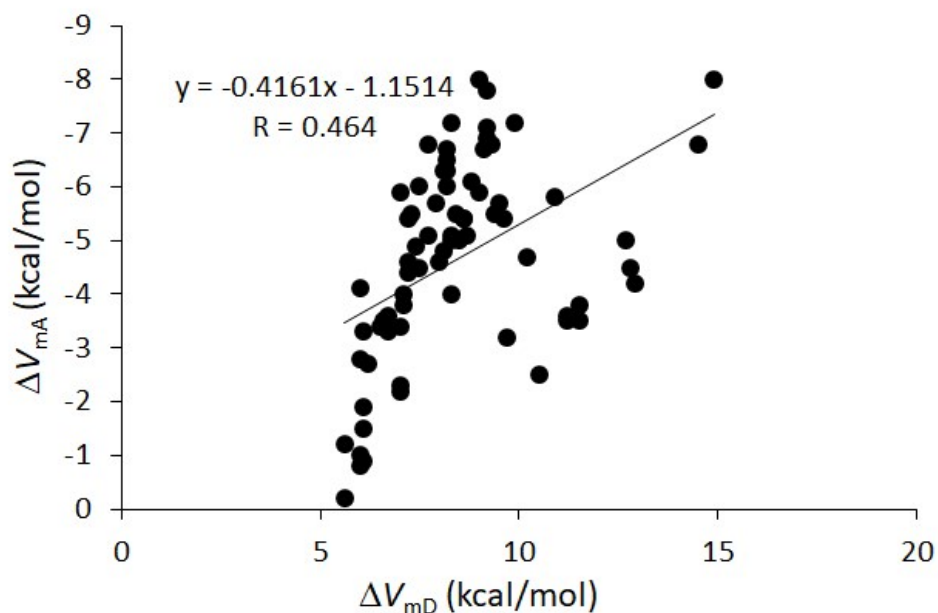

**Fig S3.** Correlation between  $\Delta V_{mD}$  and  $\Delta V_{mA}$ .

**Table S3.** Cartesian coordinates (in Angstrom unit) of B3LYP/cc-pVDZ geometries of D1 based donor systems.

| D1                               |              |              |              | D1-CH <sub>3</sub>               |              |              |              |
|----------------------------------|--------------|--------------|--------------|----------------------------------|--------------|--------------|--------------|
| E(RB3LYP) = -232.262948971 a. u. |              |              |              | E(RB3LYP) = -271.580562370 a. u. |              |              |              |
| 6                                | -0.530780000 | -1.293839000 | 0.000014000  | 6                                | -0.916742000 | 0.007349000  | -0.000006000 |
| 6                                | -1.386158000 | -0.187219000 | -0.000006000 | 6                                | -0.190663000 | 1.206740000  | -0.000017000 |
| 6                                | -0.855460000 | 1.106873000  | -0.000003000 | 6                                | -0.199310000 | -1.201254000 | -0.000001000 |
| 6                                | 0.530914000  | 1.293807000  | 0.000002000  | 1                                | -0.745235000 | -2.149315000 | 0.000000000  |
| 6                                | 1.386120000  | 0.187230000  | 0.000006000  | 1                                | -0.728108000 | 2.159197000  | -0.000029000 |
| 6                                | 0.855251000  | -1.106740000 | -0.000015000 | 6                                | 1.196510000  | -1.210145000 | -0.000003000 |
| 1                                | -0.945685000 | -2.304838000 | 0.000018000  | 6                                | 1.208456000  | 1.203473000  | -0.000018000 |
| 1                                | 0.946155000  | 2.304609000  | 0.000005000  | 1                                | 1.732849000  | -2.162493000 | -0.000003000 |
| 1                                | 2.469058000  | 0.334029000  | 0.000010000  | 1                                | 1.752142000  | 2.151559000  | -0.000031000 |
| 1                                | -1.523211000 | 1.971707000  | 0.000000000  | 6                                | 1.907847000  | -0.005154000 | -0.000011000 |
| 1                                | -2.468940000 | -0.334619000 | -0.000004000 | 6                                | -2.426946000 | 0.002909000  | 0.000039000  |
| 1                                | 1.523301000  | -1.971562000 | -0.000011000 | 1                                | -2.826321000 | -0.518121000 | 0.886613000  |
|                                  |              |              |              | 1                                | -2.834159000 | 1.024917000  | -0.000390000 |
|                                  |              |              |              | 1                                | -2.826379000 | -0.518906000 | -0.886041000 |
|                                  |              |              |              | 1                                | 3.000309000  | -0.010341000 | -0.000016000 |

|                                                                       |              |              |              |                                                  |              |              |              |
|-----------------------------------------------------------------------|--------------|--------------|--------------|--------------------------------------------------|--------------|--------------|--------------|
| D1-C <sub>5</sub> H <sub>11</sub><br>E(RB3LYP) = -428.836629482 a. u. |              |              |              | D1-isopropyl<br>E(RB3LYP) = -350.208210006 a. u. |              |              |              |
| 6                                                                     | 1.285641000  | -0.338889000 | -0.000128000 | 6                                                | 0.139830000  | -0.195257000 | -0.000164000 |
| 6                                                                     | 2.340282000  | -1.269683000 | 0.000144000  | 6                                                | -0.751023000 | -1.278788000 | -0.000476000 |
| 6                                                                     | 1.614293000  | 1.024190000  | -0.000403000 | 6                                                | -0.401689000 | 1.102144000  | 0.000288000  |
| 1                                                                     | 0.824895000  | 1.777331000  | -0.000616000 | 1                                                | 0.264143000  | 1.969041000  | 0.000542000  |
| 1                                                                     | 2.107439000  | -2.338828000 | 0.000367000  | 1                                                | -0.353256000 | -2.297804000 | -0.000833000 |
| 6                                                                     | 2.950490000  | 1.443755000  | -0.000407000 | 6                                                | -1.783130000 | 1.306908000  | 0.000423000  |
| 6                                                                     | 3.672698000  | -0.856831000 | 0.000140000  | 6                                                | -2.135543000 | -1.080036000 | -0.000337000 |
| 1                                                                     | 3.179273000  | 2.512388000  | -0.000621000 | 1                                                | -2.179491000 | 2.325524000  | 0.000777000  |
| 1                                                                     | 4.471986000  | -1.602106000 | 0.000358000  | 1                                                | -2.807125000 | -1.942294000 | -0.000590000 |
| 6                                                                     | 3.985021000  | 0.507534000  | -0.000136000 | 6                                                | -2.657677000 | 0.215292000  | 0.000105000  |
| 6                                                                     | -0.146225000 | -0.849388000 | -0.000153000 | 6                                                | 1.645512000  | -0.427712000 | -0.000247000 |
| 1                                                                     | -0.278067000 | -1.509590000 | 0.877389000  | 1                                                | 1.798557000  | -1.521410000 | -0.000906000 |
| 1                                                                     | -0.278128000 | -1.509352000 | -0.877870000 | 6                                                | 2.312684000  | 0.130600000  | 1.269473000  |
| 6                                                                     | -1.259948000 | 0.200625000  | 0.000023000  | 6                                                | 2.312871000  | 0.132145000  | -1.269179000 |
| 1                                                                     | -1.153905000 | 0.856134000  | 0.883564000  | 1                                                | 1.861395000  | -0.293219000 | -2.179449000 |
| 1                                                                     | -1.154090000 | 0.856248000  | -0.883455000 | 1                                                | 2.211048000  | 1.228948000  | -1.326062000 |
| 6                                                                     | -2.661313000 | -0.419802000 | 0.000116000  | 1                                                | 3.390252000  | -0.102642000 | -1.278661000 |
| 1                                                                     | -2.770126000 | -1.078512000 | 0.882626000  | 1                                                | 2.210754000  | 1.227323000  | 1.327702000  |
| 1                                                                     | -2.770286000 | -1.078419000 | -0.882444000 | 1                                                | 3.390082000  | -0.104121000 | 1.278805000  |
| 6                                                                     | -3.791206000 | 0.615261000  | 0.000273000  | 1                                                | 1.861117000  | -0.295930000 | 2.179152000  |
| 1                                                                     | -3.681424000 | 1.272763000  | 0.882510000  | 1                                                | -3.738487000 | 0.374806000  | 0.000208000  |
| 1                                                                     | -3.681589000 | 1.272852000  | -0.881918000 |                                                  |              |              |              |
| 6                                                                     | -5.187261000 | -0.011659000 | 0.000372000  |                                                  |              |              |              |
| 1                                                                     | -5.340699000 | -0.647116000 | 0.889382000  |                                                  |              |              |              |
| 1                                                                     | -5.340864000 | -0.647028000 | -0.888672000 |                                                  |              |              |              |
| 1                                                                     | -5.976421000 | 0.757411000  | 0.000484000  |                                                  |              |              |              |
| 1                                                                     | 5.027165000  | 0.835157000  | -0.000137000 |                                                  |              |              |              |
| D1-t-but<br>E(RB3LYP) = -389.518822278 a. u.                          |              |              |              | D1-OH<br>E(RB3LYP) = -307.489739970 a. u.        |              |              |              |
| 6                                                                     | -0.076095000 | 0.028954000  | 0.000007000  | 6                                                | 0.945425000  | -0.024733000 | 0.000000000  |
| 6                                                                     | -0.820075000 | 1.219485000  | 0.000038000  | 6                                                | 0.221272000  | -1.225162000 | 0.000000000  |
| 6                                                                     | -0.796417000 | -1.181238000 | -0.000103000 | 6                                                | 0.264691000  | 1.200216000  | 0.000000000  |
| 1                                                                     | -0.259585000 | -2.132489000 | -0.000143000 | 1                                                | 0.830032000  | 2.137678000  | 0.000001000  |
| 1                                                                     | -0.312591000 | 2.184028000  | 0.000104000  | 1                                                | 0.770033000  | -2.168672000 | -0.000001000 |
| 6                                                                     | -2.191816000 | -1.202203000 | -0.000158000 | 6                                                | -1.133113000 | 1.220772000  | 0.000000000  |
| 6                                                                     | -2.220225000 | 1.204744000  | -0.000017000 | 6                                                | -1.173262000 | -1.191804000 | -0.000002000 |

|                                                         |              |              |              |                                                                       |              |              |              |
|---------------------------------------------------------|--------------|--------------|--------------|-----------------------------------------------------------------------|--------------|--------------|--------------|
| 1                                                       | -2.717592000 | -2.160251000 | -0.000239000 | 1                                                                     | -1.653618000 | 2.181382000  | -0.000001000 |
| 1                                                       | -2.766957000 | 2.150984000  | 0.000012000  | 1                                                                     | -1.729697000 | -2.132166000 | -0.000002000 |
| 6                                                       | -2.914549000 | -0.004985000 | -0.000111000 | 6                                                                     | -1.860301000 | 0.027983000  | 0.000002000  |
| 6                                                       | 1.465111000  | 0.005896000  | 0.000059000  | 8                                                                     | 2.308812000  | -0.111667000 | 0.000003000  |
| 6                                                       | 1.968530000  | -0.733282000 | 1.261660000  | 1                                                                     | 2.676307000  | 0.784388000  | -0.000019000 |
| 1                                                       | 1.628684000  | -0.224936000 | 2.178402000  | 1                                                                     | -2.951814000 | 0.047091000  | 0.000004000  |
| 1                                                       | 1.606225000  | -1.772088000 | 1.300825000  |                                                                       |              |              |              |
| 1                                                       | 3.070986000  | -0.762957000 | 1.275746000  |                                                                       |              |              |              |
| 6                                                       | 1.968626000  | -0.733098000 | -1.261610000 |                                                                       |              |              |              |
| 1                                                       | 1.606348000  | -1.771908000 | -1.300943000 |                                                                       |              |              |              |
| 1                                                       | 1.628831000  | -0.224633000 | -2.178304000 |                                                                       |              |              |              |
| 1                                                       | 3.071083000  | -0.762748000 | -1.275626000 |                                                                       |              |              |              |
| 6                                                       | 2.071716000  | 1.420811000  | 0.000182000  |                                                                       |              |              |              |
| 1                                                       | 3.171339000  | 1.353437000  | 0.000132000  |                                                                       |              |              |              |
| 1                                                       | 1.775609000  | 1.995390000  | -0.891733000 |                                                                       |              |              |              |
| 1                                                       | 1.775684000  | 1.995208000  | 0.892238000  |                                                                       |              |              |              |
| 1                                                       | -4.006904000 | -0.017544000 | -0.000157000 |                                                                       |              |              |              |
| D1-OCH <sub>3</sub><br>E(RB3LYP) = -346.790964285 a. u. |              |              |              | D1-OC <sub>2</sub> H <sub>5</sub><br>E(RB3LYP) = -386.111017911 a. u. |              |              |              |
| 6                                                       | 0.457750000  | -0.271036000 | -0.000040000 | 6                                                                     | 0.051046000  | -0.213966000 | 0.000000000  |
| 6                                                       | -0.494825000 | -1.304471000 | -0.000001000 | 6                                                                     | 0.945085000  | -1.298730000 | 0.000000000  |
| 6                                                       | 0.032220000  | 1.065107000  | -0.000044000 | 6                                                                     | 0.552309000  | 1.096189000  | 0.000002000  |
| 1                                                       | 0.751542000  | 1.883747000  | -0.000077000 | 1                                                                     | -0.119094000 | 1.954436000  | 0.000004000  |
| 1                                                       | -0.138384000 | -2.336228000 | 0.000005000  | 1                                                                     | 0.531437000  | -2.308932000 | 0.000000000  |
| 6                                                       | -1.339151000 | 1.352780000  | -0.000008000 | 6                                                                     | 1.937662000  | 1.305933000  | 0.000000000  |
| 6                                                       | -1.853802000 | -1.002549000 | 0.000029000  | 6                                                                     | 2.319004000  | -1.074228000 | 0.000001000  |
| 1                                                       | -1.660596000 | 2.397162000  | -0.000012000 | 1                                                                     | 2.317316000  | 2.330616000  | 0.000001000  |
| 1                                                       | -2.583167000 | -1.816126000 | 0.000059000  | 1                                                                     | 3.001116000  | -1.927838000 | 0.000000000  |
| 6                                                       | -2.287240000 | 0.330247000  | 0.000028000  | 6                                                                     | 2.826991000  | 0.231853000  | -0.000003000 |
| 8                                                       | 1.762996000  | -0.671966000 | -0.000078000 | 8                                                                     | -1.273849000 | -0.540436000 | 0.000003000  |
| 6                                                       | 2.771628000  | 0.324473000  | 0.000077000  | 6                                                                     | -2.242050000 | 0.507913000  | -0.000001000 |
| 1                                                       | 2.716057000  | 0.964360000  | -0.899125000 | 1                                                                     | -2.106095000 | 1.146139000  | -0.893369000 |
| 1                                                       | 2.715859000  | 0.964277000  | 0.899325000  | 1                                                                     | -2.106098000 | 1.146143000  | 0.893365000  |
| 1                                                       | 3.728821000  | -0.213543000 | 0.000154000  | 6                                                                     | -3.613961000 | -0.140130000 | -0.000002000 |
| 1                                                       | -3.353583000 | 0.564777000  | 0.000055000  | 1                                                                     | -3.744820000 | -0.771962000 | 0.892104000  |
|                                                         |              |              |              | 1                                                                     | -3.744822000 | -0.771957000 | -0.892111000 |
|                                                         |              |              |              | 1                                                                     | -4.399522000 | 0.631773000  | 0.000001000  |
|                                                         |              |              |              | 1                                                                     | 3.904855000  | 0.406070000  | -0.000005000 |

|                                                          |              |              |              |                                                                         |              |              |              |
|----------------------------------------------------------|--------------|--------------|--------------|-------------------------------------------------------------------------|--------------|--------------|--------------|
| D1-NH <sub>2</sub><br>E(RB3LYP) = -287.622688193 a. u.   |              |              |              | D1-N(CH <sub>3</sub> ) <sub>2</sub><br>E(RB3LYP) = -366.232737443 a. u. |              |              |              |
| 6                                                        | -0.942414000 | 0.000293000  | -0.008946000 | 6                                                                       | -0.184406000 | 0.000002000  | -0.066206000 |
| 6                                                        | -0.221983000 | -1.209687000 | -0.004296000 | 6                                                                       | 0.551070000  | 1.209849000  | -0.028813000 |
| 6                                                        | -0.221962000 | 1.210028000  | -0.004341000 | 6                                                                       | 0.551067000  | -1.209847000 | -0.028808000 |
| 1                                                        | -0.765745000 | 2.159059000  | -0.010530000 | 1                                                                       | 0.035057000  | -2.168867000 | -0.035899000 |
| 1                                                        | -0.766328000 | -2.158444000 | -0.010435000 | 1                                                                       | 0.035062000  | 2.168870000  | -0.035910000 |
| 6                                                        | 1.173640000  | 1.204265000  | 0.003316000  | 6                                                                       | 1.945259000  | -1.200039000 | 0.015180000  |
| 6                                                        | 1.173458000  | -1.204596000 | 0.003306000  | 6                                                                       | 1.945262000  | 1.200038000  | 0.015174000  |
| 1                                                        | 1.710595000  | 2.156117000  | 0.008510000  | 1                                                                       | 2.477645000  | -2.154445000 | 0.039361000  |
| 1                                                        | 1.709442000  | -2.156946000 | 0.008510000  | 1                                                                       | 2.477650000  | 2.154443000  | 0.039351000  |
| 6                                                        | 1.884019000  | -0.000098000 | 0.007426000  | 6                                                                       | 2.660715000  | -0.000001000 | 0.035386000  |
| 7                                                        | -2.339367000 | -0.000038000 | -0.082184000 | 7                                                                       | -1.574584000 | 0.000001000  | -0.144971000 |
| 1                                                        | -2.778701000 | 0.835535000  | 0.293292000  | 6                                                                       | -2.295842000 | 1.242665000  | 0.056462000  |
| 1                                                        | -2.778124000 | -0.836288000 | 0.292438000  | 1                                                                       | -2.007671000 | 1.997366000  | -0.694148000 |
| 1                                                        | 2.975883000  | 0.000002000  | 0.014707000  | 1                                                                       | -3.371608000 | 1.056953000  | -0.062189000 |
|                                                          |              |              |              | 1                                                                       | -2.130064000 | 1.686374000  | 1.059719000  |
|                                                          |              |              |              | 6                                                                       | -2.295836000 | -1.242667000 | 0.056451000  |
|                                                          |              |              |              | 1                                                                       | -3.371602000 | -1.056965000 | -0.062228000 |
|                                                          |              |              |              | 1                                                                       | -2.007639000 | -1.997369000 | -0.694146000 |
|                                                          |              |              |              | 1                                                                       | -2.130080000 | -1.686370000 | 1.059717000  |
|                                                          |              |              |              | 1                                                                       | 3.751615000  | -0.000002000 | 0.072216000  |
| D1-PhCH <sub>3</sub><br>E(RB3LYP) = -502.651273213 a. u. |              |              |              | D2-PhNH <sub>2</sub><br>E(RB3LYP) = -518.693666665 a. u.                |              |              |              |
| 6                                                        | -1.218600000 | 0.000709000  | -0.000106000 | 6                                                                       | -1.203062000 | 0.000216000  | -0.000679000 |
| 6                                                        | -1.942540000 | -1.140945000 | -0.392788000 | 6                                                                       | -1.932330000 | -1.142205000 | -0.384220000 |
| 6                                                        | -1.945065000 | 1.140555000  | 0.393081000  | 6                                                                       | -1.929878000 | 1.143272000  | 0.385599000  |
| 1                                                        | -1.407575000 | 2.030558000  | 0.727359000  | 1                                                                       | -1.391825000 | 2.035050000  | 0.714474000  |
| 1                                                        | -1.403198000 | -2.029877000 | -0.726968000 | 1                                                                       | -1.396210000 | -2.034169000 | -0.715664000 |
| 6                                                        | -3.341421000 | 1.139481000  | 0.392786000  | 6                                                                       | -3.326087000 | 1.145140000  | 0.386005000  |
| 6                                                        | -3.338903000 | -1.143137000 | -0.392258000 | 6                                                                       | -3.328536000 | -1.142817000 | -0.379152000 |
| 1                                                        | -3.882321000 | 2.034274000  | 0.709982000  | 1                                                                       | -3.864466000 | 2.043907000  | 0.696810000  |
| 1                                                        | -3.877654000 | -2.039317000 | -0.709183000 | 1                                                                       | -3.868923000 | -2.040998000 | -0.688144000 |
| 6                                                        | -4.045722000 | -0.002628000 | 0.000322000  | 6                                                                       | -4.034188000 | 0.001439000  | 0.004840000  |
| 6                                                        | 2.393527000  | -1.130766000 | 0.392994000  | 6                                                                       | 2.409832000  | -1.147535000 | 0.371566000  |
| 6                                                        | 3.120598000  | 0.004505000  | -0.001176000 | 6                                                                       | 3.136166000  | -0.002149000 | -0.005627000 |
| 6                                                        | 2.393440000  | 1.136315000  | -0.394007000 | 6                                                                       | 2.410302000  | 1.144088000  | -0.381418000 |
| 6                                                        | 0.999832000  | -1.134099000 | 0.393508000  | 6                                                                       | 1.017313000  | -1.141555000 | 0.369259000  |



|   |              |              |              |   |              |              |              |
|---|--------------|--------------|--------------|---|--------------|--------------|--------------|
| 6 | 0.996719000  | 1.137954000  | -0.394519000 | 6 | 1.017830000  | 1.139348000  | -0.377319000 |
| 6 | 0.268214000  | 0.002578000  | -0.000810000 | 6 | 0.281914000  | -0.000792000 | -0.003530000 |
| 1 | 2.930112000  | -2.028073000 | 0.714586000  | 1 | 2.947536000  | -2.049670000 | 0.676789000  |
| 1 | 0.464030000  | 2.029932000  | -0.731552000 | 1 | 0.488475000  | 2.039765000  | -0.696844000 |
| 1 | 2.929072000  | 2.034017000  | -0.714777000 | 1 | 2.948579000  | 2.043755000  | -0.692712000 |
| 1 | 0.467271000  | -2.026158000 | 0.730646000  | 1 | 0.487565000  | -2.039943000 | 0.693822000  |
| 6 | 4.630191000  | -0.004544000 | 0.001117000  | 7 | 4.530790000  | -0.022414000 | -0.067810000 |
| 1 | 5.028353000  | -0.222284000 | 1.006617000  | 1 | 4.971837000  | -0.708435000 | 0.537712000  |
| 1 | 5.027893000  | -0.779402000 | -0.676135000 | 1 | 4.972720000  | 0.887012000  | 0.029620000  |
| 1 | 5.040457000  | 0.964339000  | -0.320009000 | 1 | -5.126482000 | 0.001932000  | 0.006860000  |
| 1 | -5.138061000 | -0.003880000 | 0.000557000  |   |              |              |              |

**Table S4.** Cartesian coordinates (in Angstrom unit) of B3LYP/cc-pVDZ geometries of D2 based donor systems.

| D2<br>E(RB3LYP) = -615.809327961 a. u. |              |              |              | D2-CH <sub>3</sub><br>E(RB3LYP) = -655.126909590 a. u. |              |              |              |
|----------------------------------------|--------------|--------------|--------------|--------------------------------------------------------|--------------|--------------|--------------|
| 6                                      | 0.681962000  | 2.467295000  | 0.000017000  | 6                                                      | -1.054586000 | 2.465873000  | -0.000001000 |
| 6                                      | 1.431218000  | 1.237859000  | 0.000006000  | 6                                                      | -1.804527000 | 1.237042000  | -0.000096000 |
| 6                                      | -0.681962000 | 2.467295000  | 0.000021000  | 6                                                      | 0.310050000  | 2.465623000  | 0.000033000  |
| 6                                      | 0.714468000  | 0.000000000  | -0.000002000 | 6                                                      | -1.086739000 | -0.000144000 | -0.000156000 |
| 6                                      | -1.431218000 | 1.237859000  | 0.000013000  | 6                                                      | 1.058766000  | 1.236226000  | 0.000074000  |
| 6                                      | -0.714468000 | 0.000000000  | 0.000002000  | 6                                                      | 0.340943000  | 0.001953000  | -0.000034000 |
| 1                                      | 1.234144000  | 3.410598000  | 0.000023000  | 1                                                      | -1.605778000 | 3.409768000  | 0.000025000  |
| 6                                      | 2.837506000  | 1.212488000  | 0.000002000  | 6                                                      | -3.211130000 | 1.209377000  | -0.000166000 |
| 6                                      | 1.431216000  | -1.237859000 | -0.000013000 | 6                                                      | -1.801468000 | -1.239296000 | -0.000346000 |
| 6                                      | -1.431216000 | -1.237858000 | -0.000006000 | 6                                                      | 1.063724000  | -1.231813000 | -0.000173000 |
| 6                                      | 2.837508000  | -1.212488000 | -0.000016000 | 6                                                      | -3.207046000 | -1.216090000 | -0.000428000 |
| 6                                      | 3.529447000  | -0.000002000 | -0.000009000 | 6                                                      | -3.900970000 | -0.003938000 | -0.000311000 |
| 1                                      | 3.386562000  | 2.157418000  | 0.000008000  | 1                                                      | -3.761863000 | 2.153501000  | -0.000111000 |
| 6                                      | 0.681963000  | -2.467294000 | -0.000021000 | 6                                                      | -1.047330000 | -2.466847000 | -0.000491000 |
| 1                                      | 3.386560000  | -2.157420000 | -0.000025000 | 1                                                      | -3.754949000 | -2.161873000 | -0.000567000 |
| 6                                      | -2.837506000 | 1.212489000  | 0.000017000  | 6                                                      | 2.465590000  | 1.209824000  | 0.000085000  |
| 6                                      | -2.837508000 | -1.212488000 | -0.000002000 | 6                                                      | 2.467085000  | -1.201354000 | -0.000164000 |
| 6                                      | -3.529447000 | -0.000002000 | 0.000009000  | 6                                                      | 3.180370000  | 0.006838000  | 0.000098000  |
| 1                                      | -1.234143000 | 3.410598000  | 0.000030000  | 1                                                      | 0.861635000  | 3.409339000  | 0.000078000  |
| 6                                      | -0.681963000 | -2.467293000 | -0.000018000 | 6                                                      | 0.316430000  | -2.463730000 | -0.000459000 |
| 1                                      | 1.234143000  | -3.410598000 | -0.000030000 | 1                                                      | -1.596611000 | -3.411914000 | -0.000663000 |
| 1                                      | -3.386560000 | -2.157420000 | -0.000008000 | 1                                                      | 3.013882000  | -2.149023000 | -0.000447000 |
| 1                                      | -4.621823000 | 0.000001000  | 0.000012000  | 1                                                      | 0.870194000  | -3.406161000 | -0.000608000 |

|                                                                       |              |              |              |                                                  |              |              |              |
|-----------------------------------------------------------------------|--------------|--------------|--------------|--------------------------------------------------|--------------|--------------|--------------|
| 1                                                                     | -1.234143000 | -3.410597000 | -0.000024000 | 1                                                | 3.009228000  | 2.158835000  | 0.000002000  |
| 1                                                                     | -3.386564000 | 2.157417000  | 0.000025000  | 6                                                | 4.691054000  | -0.002979000 | 0.001723000  |
| 1                                                                     | 4.621823000  | 0.000000000  | -0.000011000 | 1                                                | 5.085909000  | -0.512618000 | 0.896786000  |
|                                                                       |              |              |              | 1                                                | 5.087967000  | -0.540521000 | -0.875758000 |
|                                                                       |              |              |              | 1                                                | 5.102508000  | 1.016876000  | -0.013519000 |
|                                                                       |              |              |              | 1                                                | -4.993399000 | -0.005606000 | -0.000357000 |
| D2-C <sub>5</sub> H <sub>11</sub><br>E(RB3LYP) = -812.382956643 a. u. |              |              |              | D2-isopropyl<br>E(RB3LYP) = -733.754519717 a. u. |              |              |              |
| 6                                                                     | 2.257796000  | -2.537613000 | 0.000118000  | 6                                                | -1.872248000 | 2.438810000  | -0.000038000 |
| 6                                                                     | 3.228051000  | -1.474374000 | -0.000054000 | 6                                                | -2.543828000 | 1.165237000  | -0.000012000 |
| 6                                                                     | 0.917995000  | -2.277017000 | 0.000187000  | 6                                                | -0.510347000 | 2.524178000  | -0.000055000 |
| 6                                                                     | 2.758633000  | -0.123423000 | -0.000151000 | 6                                                | -1.749985000 | -0.024548000 | -0.000001000 |
| 6                                                                     | 0.416778000  | -0.927754000 | 0.000092000  | 6                                                | 0.313916000  | 1.343913000  | -0.000046000 |
| 6                                                                     | 1.356666000  | 0.145522000  | -0.000078000 | 6                                                | -0.325271000 | 0.067179000  | -0.000017000 |
| 1                                                                     | 2.618793000  | -3.569322000 | 0.000192000  | 1                                                | -2.481596000 | 3.346249000  | -0.000048000 |
| 6                                                                     | 4.614568000  | -1.714361000 | -0.000129000 | 6                                                | -3.945810000 | 1.049317000  | 0.000003000  |
| 6                                                                     | 3.695417000  | 0.957669000  | -0.000324000 | 6                                                | -2.385219000 | -1.306169000 | 0.000024000  |
| 6                                                                     | 0.880561000  | 1.493744000  | -0.000176000 | 6                                                | 0.473988000  | -1.117820000 | -0.000010000 |
| 6                                                                     | 5.070792000  | 0.668024000  | -0.000393000 | 6                                                | -3.789604000 | -1.371276000 | 0.000039000  |
| 6                                                                     | 5.521956000  | -0.654132000 | -0.000295000 | 6                                                | -4.558082000 | -0.205079000 | 0.000033000  |
| 1                                                                     | 4.976064000  | -2.745873000 | -0.000055000 | 1                                                | -4.554834000 | 1.956929000  | -0.000005000 |
| 6                                                                     | 3.187445000  | 2.306255000  | -0.000420000 | 6                                                | -1.555167000 | -2.483644000 | 0.000031000  |
| 1                                                                     | 5.788458000  | 1.492456000  | -0.000525000 | 1                                                | -4.277117000 | -2.349554000 | 0.000057000  |
| 6                                                                     | -0.961516000 | -0.637515000 | 0.000162000  | 6                                                | 1.719310000  | 1.404191000  | -0.000061000 |
| 6                                                                     | -0.502296000 | 1.727454000  | -0.000100000 | 6                                                | 1.873500000  | -1.000308000 | -0.000028000 |
| 6                                                                     | -1.436712000 | 0.678545000  | 0.000070000  | 6                                                | 2.511463000  | 0.249647000  | -0.000051000 |
| 1                                                                     | 0.196904000  | -3.098601000 | 0.000317000  | 1                                                | -0.018997000 | 3.500612000  | -0.000077000 |
| 6                                                                     | 1.848001000  | 2.562002000  | -0.000350000 | 6                                                | -0.194230000 | -2.394292000 | 0.000015000  |
| 1                                                                     | 3.906086000  | 3.129937000  | -0.000552000 | 1                                                | -2.043606000 | -3.461529000 | 0.000049000  |
| 1                                                                     | -0.859872000 | 2.761775000  | -0.000176000 | 1                                                | 2.469648000  | -1.916620000 | -0.000022000 |
| 1                                                                     | 1.483032000  | 3.592376000  | -0.000425000 | 1                                                | 0.417782000  | -3.300015000 | 0.000020000  |
| 1                                                                     | -1.662000000 | -1.474385000 | 0.000292000  | 1                                                | 2.202257000  | 2.385801000  | -0.000085000 |
| 6                                                                     | -2.917900000 | 1.021979000  | 0.000151000  | 6                                                | 4.032113000  | 0.358274000  | -0.000045000 |
| 1                                                                     | -3.122572000 | 1.662844000  | -0.877544000 | 1                                                | 4.273837000  | 1.435471000  | -0.000207000 |
| 1                                                                     | -3.122467000 | 1.662884000  | 0.877842000  | 6                                                | 4.651108000  | -0.253226000 | -1.269529000 |
| 6                                                                     | -3.904826000 | -0.147901000 | 0.000237000  | 6                                                | 4.651020000  | -0.252822000 | 1.269685000  |
| 1                                                                     | -3.725165000 | -0.786966000 | -0.883365000 | 1                                                | 4.234734000  | 0.207985000  | 2.179419000  |
| 1                                                                     | -3.725089000 | -0.786903000 | 0.883870000  | 1                                                | 4.461977000  | -1.337891000 | 1.327230000  |
| 6                                                                     | -5.367563000 | 0.309457000  | 0.000287000  | 1                                                | 5.743672000  | -0.105053000 | 1.279448000  |

|                                              |              |              |              |                                          |              |              |              |
|----------------------------------------------|--------------|--------------|--------------|------------------------------------------|--------------|--------------|--------------|
| 1                                            | -5.550566000 | 0.951337000  | -0.882304000 | 1                                        | 4.462112000  | -1.338322000 | -1.326733000 |
| 1                                            | -5.550485000 | 0.951403000  | 0.882847000  | 1                                        | 5.743756000  | -0.105429000 | -1.279276000 |
| 6                                            | -6.372118000 | -0.847645000 | 0.000377000  | 1                                        | 4.234868000  | 0.207265000  | -2.179445000 |
| 1                                            | -6.188257000 | -1.488388000 | -0.881855000 | 1                                        | -5.648261000 | -0.275271000 | 0.000046000  |
| 1                                            | -6.188177000 | -1.488323000 | 0.882639000  |                                          |              |              |              |
| 6                                            | -7.830431000 | -0.383708000 | 0.000426000  |                                          |              |              |              |
| 1                                            | -8.055353000 | 0.229982000  | -0.888641000 |                                          |              |              |              |
| 1                                            | -8.055271000 | 0.230049000  | 0.889467000  |                                          |              |              |              |
| 1                                            | -8.526703000 | -1.237740000 | 0.000490000  |                                          |              |              |              |
| 1                                            | 6.594871000  | -0.859783000 | -0.000351000 |                                          |              |              |              |
| D2-t-but<br>E(RB3LYP) = -773.065040310 a. u. |              |              |              | D2-OH<br>E(RB3LYP) = -691.035993767 a. u |              |              |              |
| 6                                            | -1.999076000 | 2.465886000  | 0.000147000  | 6                                        | 1.038168000  | 2.464046000  | -0.000154000 |
| 6                                            | -2.744163000 | 1.234069000  | -0.000069000 | 6                                        | 1.785721000  | 1.233145000  | -0.000033000 |
| 6                                            | -0.634186000 | 2.471441000  | 0.000262000  | 6                                        | -0.325589000 | 2.469377000  | -0.000201000 |
| 6                                            | -2.020990000 | 0.000601000  | -0.000163000 | 6                                        | 1.063900000  | -0.001898000 | 0.000037000  |
| 6                                            | 0.119981000  | 1.244997000  | 0.000172000  | 6                                        | -1.080236000 | 1.241668000  | -0.000133000 |
| 6                                            | -0.593614000 | 0.010814000  | -0.000041000 | 6                                        | -0.363049000 | 0.003139000  | -0.000013000 |
| 1                                            | -2.554207000 | 3.407490000  | 0.000218000  | 1                                        | 1.591866000  | 3.406533000  | -0.000206000 |
| 6                                            | -4.150849000 | 1.198675000  | -0.000193000 | 6                                        | 3.191202000  | 1.202865000  | 0.000019000  |
| 6                                            | -2.727016000 | -1.242961000 | -0.000381000 | 6                                        | 1.777560000  | -1.241561000 | 0.000157000  |
| 6                                            | 0.138243000  | -1.215622000 | -0.000135000 | 6                                        | -1.087008000 | -1.229001000 | 0.000057000  |
| 6                                            | -4.132911000 | -1.227523000 | -0.000498000 | 6                                        | 3.183956000  | -1.221325000 | 0.000205000  |
| 6                                            | -4.833355000 | -0.018885000 | -0.000404000 | 6                                        | 3.880557000  | -0.011786000 | 0.000135000  |
| 1                                            | -4.707026000 | 2.139450000  | -0.000122000 | 1                                        | 3.743256000  | 2.146282000  | -0.000034000 |
| 6                                            | -1.964265000 | -2.465354000 | -0.000472000 | 6                                        | 1.021837000  | -2.466400000 | 0.000226000  |
| 1                                            | -4.676051000 | -2.175890000 | -0.000665000 | 1                                        | 3.729201000  | -2.168710000 | 0.000297000  |
| 6                                            | 1.527971000  | 1.228514000  | 0.000288000  | 6                                        | -2.482485000 | 1.228591000  | -0.000181000 |
| 6                                            | 1.541057000  | -1.175405000 | -0.000009000 | 6                                        | -2.491965000 | -1.200960000 | 0.000006000  |
| 6                                            | 2.259689000  | 0.033314000  | 0.000209000  | 6                                        | -3.181668000 | 0.016282000  | -0.000112000 |
| 1                                            | -0.087102000 | 3.417820000  | 0.000426000  | 1                                        | -0.873987000 | 3.414650000  | -0.000293000 |
| 6                                            | -0.600335000 | -2.453118000 | -0.000356000 | 6                                        | -0.342557000 | -2.461520000 | 0.000178000  |
| 1                                            | -2.506996000 | -3.414175000 | -0.000640000 | 1                                        | 1.568451000  | -3.413040000 | 0.000318000  |
| 1                                            | 2.076422000  | -2.127650000 | -0.000094000 | 1                                        | -3.048104000 | -2.143883000 | 0.000059000  |
| 1                                            | -0.040576000 | -3.392047000 | -0.000429000 | 1                                        | -0.896623000 | -3.403766000 | 0.000231000  |
| 1                                            | 2.042315000  | 2.189705000  | 0.000448000  | 1                                        | -3.049122000 | 2.161645000  | -0.000272000 |
| 6                                            | 3.801494000  | 0.003629000  | 0.000310000  | 8                                        | -4.545622000 | 0.085262000  | -0.000165000 |
| 6                                            | 4.300869000  | -0.737576000 | -1.261660000 | 1                                        | -4.902909000 | -0.814803000 | -0.000105000 |
| 1                                            | 3.934719000  | -1.774995000 | -1.301256000 | 1                                        | 4.972889000  | -0.014985000 | 0.000173000  |

|                                                         |              |              |              |                                                                       |              |              |              |
|---------------------------------------------------------|--------------|--------------|--------------|-----------------------------------------------------------------------|--------------|--------------|--------------|
| 1                                                       | 3.963211000  | -0.227586000 | -2.178237000 |                                                                       |              |              |              |
| 1                                                       | 5.403091000  | -0.771688000 | -1.275556000 |                                                                       |              |              |              |
| 6                                                       | 4.414318000  | 1.415890000  | 0.000260000  |                                                                       |              |              |              |
| 1                                                       | 4.121410000  | 1.991566000  | -0.891917000 |                                                                       |              |              |              |
| 1                                                       | 4.121130000  | 1.991748000  | 0.892228000  |                                                                       |              |              |              |
| 1                                                       | 5.513381000  | 1.343030000  | 0.000437000  |                                                                       |              |              |              |
| 6                                                       | 4.300724000  | -0.737419000 | 1.262430000  |                                                                       |              |              |              |
| 1                                                       | 5.402946000  | -0.771459000 | 1.276496000  |                                                                       |              |              |              |
| 1                                                       | 3.962896000  | -0.227357000 | 2.178904000  |                                                                       |              |              |              |
| 1                                                       | 3.934639000  | -1.774858000 | 1.302077000  |                                                                       |              |              |              |
| 1                                                       | -5.925714000 | -0.026902000 | -0.000498000 |                                                                       |              |              |              |
| D2-OCH <sub>3</sub><br>E(RB3LYP) = -730.337081432 a. u. |              |              |              | D2-OC <sub>2</sub> H <sub>5</sub><br>E(RB3LYP) = -769.657147314 a. u. |              |              |              |
| 6                                                       | 1.583264000  | 2.428596000  | 0.000132000  | 6                                                                     | 1.992892000  | 2.427935000  | 0.000184000  |
| 6                                                       | 2.236781000  | 1.144287000  | 0.000013000  | 6                                                                     | 2.646559000  | 1.143697000  | 0.000025000  |
| 6                                                       | 0.224267000  | 2.536586000  | 0.000187000  | 6                                                                     | 0.633848000  | 2.535756000  | 0.000235000  |
| 6                                                       | 1.424415000  | -0.033312000 | -0.000048000 | 6                                                                     | 1.834237000  | -0.033950000 | -0.000076000 |
| 6                                                       | -0.620536000 | 1.368068000  | 0.000127000  | 6                                                                     | -0.210852000 | 1.367163000  | 0.000136000  |
| 6                                                       | 0.001880000  | 0.078643000  | 0.000009000  | 6                                                                     | 0.411740000  | 0.077970000  | -0.000016000 |
| 1                                                       | 2.206556000  | 3.326601000  | 0.000178000  | 1                                                                     | 2.616091000  | 3.326016000  | 0.000259000  |
| 6                                                       | 3.635413000  | 1.008630000  | -0.000045000 | 6                                                                     | 4.045217000  | 1.008074000  | -0.000035000 |
| 6                                                       | 2.042388000  | -1.323121000 | -0.000167000 | 6                                                                     | 2.452227000  | -1.323765000 | -0.000242000 |
| 6                                                       | -0.813588000 | -1.092314000 | -0.000053000 | 6                                                                     | -0.403970000 | -1.092791000 | -0.000130000 |
| 6                                                       | 3.446975000  | -1.408577000 | -0.000220000 | 6                                                                     | 3.856802000  | -1.409166000 | -0.000296000 |
| 6                                                       | 4.231778000  | -0.255014000 | -0.000160000 | 6                                                                     | 4.641588000  | -0.255557000 | -0.000191000 |
| 1                                                       | 4.257036000  | 1.907746000  | 0.000002000  | 1                                                                     | 4.666824000  | 1.907211000  | 0.000042000  |
| 6                                                       | 1.196117000  | -2.486598000 | -0.000227000 | 6                                                                     | 1.605831000  | -2.487205000 | -0.000349000 |
| 1                                                       | 3.919560000  | -2.394231000 | -0.000311000 | 1                                                                     | 4.329431000  | -2.394809000 | -0.000422000 |
| 6                                                       | -2.017123000 | 1.456107000  | 0.000181000  | 6                                                                     | -1.607457000 | 1.454708000  | 0.000198000  |
| 6                                                       | -2.216567000 | -0.966548000 | 0.000005000  | 6                                                                     | -1.806907000 | -0.967380000 | -0.000064000 |
| 6                                                       | -2.812710000 | 0.299944000  | 0.000121000  | 6                                                                     | -2.404335000 | 0.299100000  | 0.000118000  |
| 1                                                       | -0.251956000 | 3.520225000  | 0.000277000  | 1                                                                     | 0.157538000  | 3.519373000  | 0.000352000  |
| 6                                                       | -0.164412000 | -2.377233000 | -0.000172000 | 6                                                                     | 0.245311000  | -2.377751000 | -0.000297000 |
| 1                                                       | 1.668846000  | -3.472215000 | -0.000318000 | 1                                                                     | 2.078508000  | -3.472854000 | -0.000478000 |
| 1                                                       | -2.821248000 | -1.873242000 | -0.000042000 | 1                                                                     | -2.410820000 | -1.874486000 | -0.000182000 |
| 1                                                       | -0.788492000 | -3.274709000 | -0.000219000 | 1                                                                     | -0.378803000 | -3.275216000 | -0.000383000 |
| 1                                                       | -2.515739000 | 2.427327000  | 0.000271000  | 1                                                                     | -2.105773000 | 2.426106000  | 0.000314000  |
| 8                                                       | -4.159676000 | 0.520376000  | 0.000186000  | 8                                                                     | -3.750260000 | 0.519281000  | 0.000113000  |
| 6                                                       | -5.027640000 | -0.601614000 | 0.000095000  | 6                                                                     | -4.636018000 | -0.600747000 | 0.000169000  |

|                                                        |              |              |              |                                                                         |              |              |              |
|--------------------------------------------------------|--------------|--------------|--------------|-------------------------------------------------------------------------|--------------|--------------|--------------|
| 1                                                      | -4.887535000 | -1.227630000 | -0.899387000 | 1                                                                       | -4.451476000 | -1.225970000 | -0.893423000 |
| 1                                                      | -4.887519000 | -1.227789000 | 0.899463000  | 1                                                                       | -4.451257000 | -1.226042000 | 0.893663000  |
| 1                                                      | -6.047171000 | -0.194351000 | 0.000141000  | 6                                                                       | -6.053071000 | -0.058839000 | 0.000360000  |
| 1                                                      | 5.320852000  | -0.339913000 | -0.000204000 | 1                                                                       | -6.231837000 | 0.560979000  | -0.891775000 |
|                                                        |              |              |              | 1                                                                       | -6.231619000 | 0.560912000  | 0.892586000  |
|                                                        |              |              |              | 1                                                                       | -6.777265000 | -0.888522000 | 0.000415000  |
|                                                        |              |              |              | 1                                                                       | 5.730673000  | -0.340442000 | -0.000236000 |
| D2-NH <sub>2</sub><br>E(RB3LYP) = -671.169185852 a. u. |              |              |              | D2-N(CH <sub>3</sub> ) <sub>2</sub><br>E(RB3LYP) = -749.779097286 a. u. |              |              |              |
| 6                                                      | -1.038548000 | 2.464479000  | 0.000045000  | 6                                                                       | 1.706599000  | 2.463709000  | 0.000973000  |
| 6                                                      | -1.791618000 | 1.237561000  | 0.001236000  | 6                                                                       | 2.462036000  | 1.237720000  | 0.007045000  |
| 6                                                      | 0.325754000  | 2.463640000  | -0.002349000 | 6                                                                       | 0.342372000  | 2.460688000  | -0.013785000 |
| 6                                                      | -1.074327000 | -0.000021000 | -0.000409000 | 6                                                                       | 1.745425000  | -0.000003000 | -0.002426000 |
| 6                                                      | 1.075665000  | 1.232992000  | -0.004376000 | 6                                                                       | -0.406825000 | 1.228751000  | -0.026679000 |
| 6                                                      | 0.352049000  | 0.000012000  | -0.003491000 | 6                                                                       | 0.319820000  | -0.000008000 | -0.020036000 |
| 1                                                      | -1.587941000 | 3.409620000  | 0.000786000  | 1                                                                       | 2.254310000  | 3.409833000  | 0.008962000  |
| 6                                                      | -3.197818000 | 1.212341000  | 0.003948000  | 6                                                                       | 3.867976000  | 1.212506000  | 0.023230000  |
| 6                                                      | -1.791546000 | -1.237620000 | 0.001235000  | 6                                                                       | 2.462051000  | -1.237715000 | 0.007216000  |
| 6                                                      | 1.075616000  | -1.232995000 | -0.004371000 | 6                                                                       | -0.406828000 | -1.228764000 | -0.026534000 |
| 6                                                      | -3.197797000 | -1.212257000 | 0.003949000  | 6                                                                       | 3.867982000  | -1.212514000 | 0.023397000  |
| 6                                                      | -3.890824000 | 0.000000000  | 0.005232000  | 6                                                                       | 4.561002000  | -0.000002000 | 0.030897000  |
| 1                                                      | -3.746326000 | 2.157723000  | 0.004982000  | 1                                                                       | 4.416849000  | 2.157767000  | 0.030229000  |
| 6                                                      | -1.038586000 | -2.464520000 | 0.000043000  | 6                                                                       | 1.706609000  | -2.463710000 | 0.001319000  |
| 1                                                      | -3.746588000 | -2.157484000 | 0.004982000  | 1                                                                       | 4.416857000  | -2.157774000 | 0.030525000  |
| 6                                                      | 2.477937000  | 1.211500000  | -0.004827000 | 6                                                                       | -1.808804000 | 1.211723000  | -0.041462000 |
| 6                                                      | 2.477943000  | -1.211517000 | -0.004860000 | 6                                                                       | -1.808797000 | -1.211743000 | -0.041303000 |
| 6                                                      | 3.191316000  | -0.000037000 | -0.005336000 | 6                                                                       | -2.538047000 | -0.000005000 | -0.062905000 |
| 1                                                      | 0.876884000  | 3.407651000  | -0.003663000 | 1                                                                       | -0.209655000 | 3.404322000  | -0.017724000 |
| 6                                                      | 0.325761000  | -2.463616000 | -0.002348000 | 6                                                                       | 0.342391000  | -2.460702000 | -0.013453000 |
| 1                                                      | -1.587917000 | -3.409686000 | 0.000783000  | 1                                                                       | 2.254343000  | -3.409823000 | 0.009447000  |
| 1                                                      | 3.025310000  | -2.158577000 | -0.009240000 | 1                                                                       | -2.328430000 | -2.168962000 | -0.039313000 |
| 1                                                      | 0.876892000  | -3.407628000 | -0.003659000 | 1                                                                       | -0.209633000 | -3.404338000 | -0.017263000 |
| 1                                                      | 3.025352000  | 2.158536000  | -0.009139000 | 1                                                                       | -2.328440000 | 2.168945000  | -0.039751000 |
| 7                                                      | 4.586669000  | -0.000006000 | -0.070203000 | 7                                                                       | -3.927481000 | 0.000059000  | -0.109844000 |
| 1                                                      | 5.027536000  | -0.836912000 | 0.299559000  | 6                                                                       | -4.648425000 | 1.245030000  | 0.080399000  |
| 1                                                      | 5.027439000  | 0.837227000  | 0.298930000  | 1                                                                       | -4.460769000 | 1.708974000  | 1.069831000  |
| 1                                                      | -4.983188000 | -0.000089000 | 0.007174000  | 1                                                                       | -4.380552000 | 1.985021000  | -0.692328000 |
|                                                        |              |              |              | 1                                                                       | -5.725657000 | 1.053333000  | -0.008495000 |
|                                                        |              |              |              | 6                                                                       | -4.648616000 | -1.245017000 | 0.078851000  |

|                                                          |              |              |              |              |
|----------------------------------------------------------|--------------|--------------|--------------|--------------|
|                                                          | 1            | -5.725723000 | -1.053383000 | -0.011748000 |
|                                                          | 1            | -4.379426000 | -1.984618000 | -0.693761000 |
|                                                          | 1            | -4.462541000 | -1.709394000 | 1.068399000  |
|                                                          | 1            | 5.653297000  | 0.000010000  | 0.043431000  |
| D2-PhCH <sub>3</sub><br>E(RB3LYP) = -886.197377334 a. u. |              |              |              |              |
| 6                                                        | -2.889569000 | 2.456562000  | 0.216834000  |              |
| 6                                                        | -3.640939000 | 1.232639000  | 0.108586000  |              |
| 6                                                        | -1.525500000 | 2.455840000  | 0.215199000  |              |
| 6                                                        | -2.924277000 | -0.000549000 | 0.000111000  |              |
| 6                                                        | -0.777073000 | 1.230132000  | 0.103625000  |              |
| 6                                                        | -1.497064000 | 0.000286000  | -0.000098000 |              |
| 1                                                        | -3.440193000 | 3.396989000  | 0.301005000  |              |
| 6                                                        | -5.046974000 | 1.206258000  | 0.106588000  |              |
| 6                                                        | -3.639700000 | -1.234544000 | -0.108156000 |              |
| 6                                                        | -0.775452000 | -1.228637000 | -0.103932000 |              |
| 6                                                        | -5.045583000 | -1.210181000 | -0.105858000 |              |
| 6                                                        | -5.738021000 | -0.002298000 | 0.000426000  |              |
| 1                                                        | -5.597122000 | 2.147053000  | 0.189323000  |              |
| 6                                                        | -2.886628000 | -2.457597000 | -0.216552000 |              |
| 1                                                        | -5.594317000 | -2.151821000 | -0.188481000 |              |
| 6                                                        | 0.626917000  | 1.205303000  | 0.100906000  |              |
| 6                                                        | 0.628287000  | -1.202030000 | -0.101445000 |              |
| 6                                                        | 1.345792000  | 0.002225000  | -0.000526000 |              |
| 1                                                        | -0.973005000 | 3.395249000  | 0.298351000  |              |
| 6                                                        | -1.522710000 | -2.455333000 | -0.215230000 |              |
| 1                                                        | -3.436336000 | -3.398618000 | -0.300554000 |              |
| 1                                                        | 1.170478000  | -2.144384000 | -0.207903000 |              |
| 1                                                        | -0.969125000 | -3.394084000 | -0.298467000 |              |
| 1                                                        | 1.167894000  | 2.148347000  | 0.207483000  |              |
| 6                                                        | 4.957117000  | -0.995586000 | 0.666111000  |              |
| 6                                                        | 5.684728000  | 0.003117000  | -0.001790000 |              |
| 6                                                        | 4.958413000  | 0.999769000  | -0.667583000 |              |
| 6                                                        | 3.563459000  | -0.998123000 | 0.667096000  |              |
| 6                                                        | 3.561739000  | 1.002284000  | -0.668543000 |              |
| 6                                                        | 2.833142000  | 0.003030000  | -0.001337000 |              |
| 1                                                        | 5.493249000  | -1.782791000 | 1.203970000  |              |
| 1                                                        | 3.029298000  | 1.780603000  | -1.219581000 |              |
| 1                                                        | 5.494660000  | 1.787043000  | -1.204444000 |              |
| 1                                                        | 3.030096000  | -1.775786000 | 1.218242000  |              |
| D2-PhNH <sub>2</sub><br>E(RB3LYP) = -902.239892147 a. u. |              |              |              |              |
| 6                                                        | -2.881866000 | -2.456104000 | -0.215550000 |              |
| 6                                                        | -3.633846000 | -1.232757000 | -0.106627000 |              |
| 6                                                        | -1.517700000 | -2.454929000 | -0.215268000 |              |
| 6                                                        | -2.917558000 | 0.000631000  | 0.000853000  |              |
| 6                                                        | -0.769148000 | -1.228955000 | -0.104512000 |              |
| 6                                                        | -1.490304000 | 0.000042000  | -0.000482000 |              |
| 1                                                        | -3.432340000 | -3.396755000 | -0.299220000 |              |
| 6                                                        | -5.040080000 | -1.206846000 | -0.103146000 |              |
| 6                                                        | -3.632651000 | 1.234585000  | 0.109613000  |              |
| 6                                                        | -0.767994000 | 1.228497000  | 0.102111000  |              |
| 6                                                        | -5.038922000 | 1.209720000  | 0.108756000  |              |
| 6                                                        | -5.731300000 | 0.001719000  | 0.003462000  |              |
| 1                                                        | -5.589811000 | -2.147826000 | -0.185126000 |              |
| 6                                                        | -2.879547000 | 2.457355000  | 0.216915000  |              |
| 1                                                        | -5.587919000 | 2.151053000  | 0.191632000  |              |
| 6                                                        | 0.634620000  | -1.203538000 | -0.105356000 |              |
| 6                                                        | 0.635757000  | 1.201889000  | 0.100447000  |              |
| 6                                                        | 1.356452000  | -0.001106000 | -0.003013000 |              |
| 1                                                        | -0.965137000 | -3.394266000 | -0.299126000 |              |
| 6                                                        | -1.515365000 | 2.455058000  | 0.214012000  |              |
| 1                                                        | -3.429105000 | 3.398474000  | 0.301315000  |              |
| 1                                                        | 1.176027000  | 2.145072000  | 0.209909000  |              |
| 1                                                        | -0.961919000 | 3.394023000  | 0.296417000  |              |
| 1                                                        | 1.174073000  | -2.146998000 | -0.216264000 |              |
| 6                                                        | 4.969729000  | 1.018915000  | -0.644852000 |              |
| 6                                                        | 5.695459000  | -0.002588000 | -0.002706000 |              |
| 6                                                        | 4.968848000  | -1.023591000 | 0.639093000  |              |
| 6                                                        | 3.577422000  | 1.014803000  | -0.641073000 |              |
| 6                                                        | 3.576512000  | -1.019136000 | 0.633775000  |              |
| 6                                                        | 2.841751000  | -0.002082000 | -0.004021000 |              |
| 1                                                        | 5.508097000  | 1.817010000  | -1.163630000 |              |
| 1                                                        | 3.046554000  | -1.812792000 | 1.165071000  |              |
| 1                                                        | 5.506272000  | -1.825010000 | 1.153791000  |              |
| 1                                                        | 3.048255000  | 1.811137000  | -1.169130000 |              |

|   |              |              |              |   |              |              |              |
|---|--------------|--------------|--------------|---|--------------|--------------|--------------|
| 6 | 7.194278000  | -0.006410000 | 0.002391000  | 7 | 7.089250000  | -0.036452000 | -0.056296000 |
| 1 | 7.592528000  | 0.030234000  | 1.030456000  | 1 | 7.531563000  | -0.557736000 | 0.694779000  |
| 1 | 7.590792000  | -0.924908000 | -0.462778000 | 1 | 7.532721000  | 0.868092000  | -0.185378000 |
| 1 | 7.605241000  | 0.852754000  | -0.548117000 | 1 | -6.823702000 | 0.002192000  | 0.004445000  |
| 1 | -6.830432000 | -0.002825000 | 0.000553000  |   |              |              |              |

**Table S5.** Cartesian coordinates (in Angstrom unit) of B3LYP/cc-pVDZ geometries of D3 based donor systems.

| D3<br>E(RB3LYP) = -749.742344106 a. u. |              |              |              | D3-CH <sub>3</sub><br>E(RB3LYP) = -789.059692283 a. u |              |              |              |
|----------------------------------------|--------------|--------------|--------------|-------------------------------------------------------|--------------|--------------|--------------|
| 7                                      | 0.000059000  | 0.000065000  | 0.000063000  | 7                                                     | -0.354567000 | -0.000174000 | 0.002985000  |
| 6                                      | -2.211229000 | 0.693214000  | 0.815160000  | 6                                                     | 1.791735000  | 0.859473000  | 0.841945000  |
| 6                                      | -1.086956000 | 0.916949000  | -0.000073000 | 6                                                     | 1.069095000  | -0.004002000 | -0.000988000 |
| 6                                      | -3.279585000 | 1.591346000  | 0.804814000  | 6                                                     | 3.185130000  | 0.857373000  | 0.828584000  |
| 1                                      | -4.144511000 | 1.400740000  | 1.444717000  | 1                                                     | 3.722115000  | 1.539555000  | 1.493995000  |
| 6                                      | -1.055965000 | 2.062726000  | -0.815486000 | 6                                                     | 1.784468000  | -0.869010000 | -0.843667000 |
| 6                                      | -3.241632000 | 2.734263000  | -0.000291000 | 6                                                     | 3.911678000  | -0.010637000 | -0.003749000 |
| 1                                      | -0.190739000 | 2.241839000  | -1.455710000 | 1                                                     | 1.241570000  | -1.543340000 | -1.508145000 |
| 1                                      | -4.076292000 | 3.438242000  | -0.000376000 | 6                                                     | 3.181012000  | -0.873400000 | -0.832451000 |
| 6                                      | -2.121400000 | 2.964326000  | -0.805311000 | 1                                                     | 3.713884000  | -1.558353000 | -1.497703000 |
| 1                                      | -2.079341000 | 3.848926000  | -1.445325000 | 1                                                     | 1.251986000  | 1.535355000  | 1.507494000  |
| 1                                      | -2.241958000 | -0.189799000 | 1.455408000  | 6                                                     | -2.471527000 | -3.675039000 | 0.000614000  |
| 6                                      | 3.988951000  | 1.439993000  | 0.000278000  | 6                                                     | -1.328745000 | -3.515836000 | 0.791104000  |
| 6                                      | 3.017895000  | 2.044873000  | 0.804685000  | 6                                                     | -2.907634000 | -2.606343000 | -0.789147000 |
| 6                                      | 3.628258000  | 0.354377000  | -0.804233000 | 1                                                     | -0.978320000 | -4.338637000 | 1.418952000  |
| 1                                      | 3.285144000  | 2.889555000  | 1.444212000  | 1                                                     | -3.794185000 | -2.716517000 | -1.418324000 |
| 1                                      | 4.373512000  | -0.124825000 | -1.443658000 | 6                                                     | -0.634422000 | -2.305214000 | 0.802171000  |
| 6                                      | 1.705864000  | 1.568850000  | 0.814836000  | 6                                                     | -2.210075000 | -1.397458000 | -0.798518000 |
| 6                                      | 2.314691000  | -0.117409000 | -0.814597000 | 1                                                     | 0.249282000  | -2.184333000 | 1.430613000  |
| 1                                      | 0.956349000  | 2.037485000  | 1.454516000  | 1                                                     | -2.549102000 | -0.572921000 | -1.427554000 |
| 1                                      | 2.037396000  | -0.956725000 | -1.454316000 | 6                                                     | -1.065701000 | -1.230816000 | 0.002760000  |
| 6                                      | 1.337655000  | 0.482926000  | 0.000057000  | 6                                                     | -1.058471000 | 1.234166000  | -0.000289000 |
| 6                                      | -0.250588000 | -1.399786000 | 0.000062000  | 6                                                     | -0.619961000 | 2.305247000  | -0.800242000 |
| 6                                      | -1.258365000 | -1.945735000 | -0.815387000 | 6                                                     | -2.203018000 | 1.408799000  | 0.799387000  |
| 6                                      | 0.505096000  | -2.261568000 | 0.815479000  | 1                                                     | 0.263638000  | 2.178542000  | -1.427719000 |
| 1                                      | -1.846026000 | -1.285912000 | -1.455612000 | 1                                                     | -2.547648000 | 0.586909000  | 1.428896000  |
| 1                                      | 1.285204000  | -1.846711000 | 1.455721000  | 6                                                     | -1.307023000 | 3.520162000  | -0.791228000 |
| 6                                      | -1.506620000 | -3.319201000 | -0.805177000 | 6                                                     | -2.893277000 | 2.621681000  | 0.787845000  |
| 6                                      | 0.261313000  | -3.635834000 | 0.805175000  | 1                                                     | -0.950838000 | 4.340171000  | -1.419493000 |

|                                                                       |              |              |              |                                                  |              |              |              |
|-----------------------------------------------------------------------|--------------|--------------|--------------|--------------------------------------------------|--------------|--------------|--------------|
| 1                                                                     | -2.293721000 | -3.725034000 | -1.445233000 | 1                                                | -3.779953000 | 2.737877000  | 1.415779000  |
| 1                                                                     | 0.858687000  | -4.289628000 | 1.445174000  | 6                                                | -2.449718000 | 3.686985000  | -0.002485000 |
| 6                                                                     | -0.747424000 | -4.174342000 | -0.000033000 | 6                                                | 5.421498000  | -0.007490000 | 0.002296000  |
| 1                                                                     | -0.939872000 | -5.249149000 | -0.000084000 | 1                                                | 5.821022000  | -0.251147000 | 1.001598000  |
| 1                                                                     | 5.015987000  | 1.810724000  | 0.000367000  | 1                                                | 5.828843000  | -0.741851000 | -0.708472000 |
|                                                                       |              |              |              | 1                                                | 5.823877000  | 0.982808000  | -0.270992000 |
|                                                                       |              |              |              | 1                                                | -2.988498000 | 4.636701000  | -0.003272000 |
|                                                                       |              |              |              | 1                                                | -3.015974000 | -4.621448000 | -0.000197000 |
| D3-C <sub>5</sub> H <sub>11</sub><br>E(RB3LYP) = -946.315790717 a. u. |              |              |              | D3-isopropyl<br>E(RB3LYP) = -867.687421670 a. u. |              |              |              |
| 7                                                                     | 1.935394000  | 0.023064000  | 0.035630000  | 7                                                | -0.989798000 | 0.002184000  | -0.017269000 |
| 6                                                                     | -0.385300000 | 0.570249000  | -0.567002000 | 6                                                | -1.156628000 | 2.337629000  | -0.758487000 |
| 6                                                                     | 0.533672000  | -0.186407000 | 0.174040000  | 6                                                | -1.625129000 | 1.272445000  | 0.032178000  |
| 6                                                                     | -1.760591000 | 0.368121000  | -0.417459000 | 6                                                | -1.776293000 | 3.586840000  | -0.698134000 |
| 1                                                                     | -2.441076000 | 0.979998000  | -1.011607000 | 1                                                | -1.397755000 | 4.401770000  | -1.319894000 |
| 6                                                                     | 0.036648000  | -1.157878000 | 1.062031000  | 6                                                | -2.730869000 | 1.488162000  | 0.875121000  |
| 6                                                                     | -2.267793000 | -0.603615000 | 0.456277000  | 6                                                | -2.880992000 | 3.795006000  | 0.133750000  |
| 1                                                                     | 0.734937000  | -1.753583000 | 1.652522000  | 1                                                | -3.097920000 | 0.670654000  | 1.497628000  |
| 6                                                                     | -1.334985000 | -1.361301000 | 1.187156000  | 6                                                | -3.354636000 | 2.735989000  | 0.914986000  |
| 1                                                                     | -1.695022000 | -2.123107000 | 1.885087000  | 1                                                | -4.212073000 | 2.883947000  | 1.575963000  |
| 1                                                                     | -0.020071000 | 1.326617000  | -1.263888000 | 1                                                | -0.302842000 | 2.179296000  | -1.419174000 |
| 6                                                                     | 4.535196000  | -3.310918000 | -0.298715000 | 6                                                | -3.308428000 | -3.548810000 | -0.040311000 |
| 6                                                                     | 3.302756000  | -3.304033000 | -0.959607000 | 6                                                | -3.706130000 | -2.438641000 | -0.792322000 |
| 6                                                                     | 4.899797000  | -2.203200000 | 0.473535000  | 6                                                | -2.136651000 | -3.472565000 | 0.719367000  |
| 1                                                                     | 3.005323000  | -4.158548000 | -1.572289000 | 1                                                | -4.615013000 | -2.484099000 | -1.397170000 |
| 1                                                                     | 5.855770000  | -2.195523000 | 1.002768000  | 1                                                | -1.815433000 | -4.328556000 | 1.317758000  |
| 6                                                                     | 2.448344000  | -2.204818000 | -0.860599000 | 6                                                | -2.942248000 | -1.270579000 | -0.794907000 |
| 6                                                                     | 4.044844000  | -1.106696000 | 0.593253000  | 6                                                | -1.375358000 | -2.302872000 | 0.737434000  |
| 1                                                                     | 1.493896000  | -2.201660000 | -1.389247000 | 1                                                | -3.251939000 | -0.413265000 | -1.394586000 |
| 1                                                                     | 4.330863000  | -0.252310000 | 1.208661000  | 1                                                | -0.468957000 | -2.246637000 | 1.342215000  |
| 6                                                                     | 2.808254000  | -1.092232000 | -0.078175000 | 6                                                | -1.768038000 | -1.187258000 | -0.024340000 |
| 6                                                                     | 2.453301000  | 1.345930000  | 0.002917000  | 6                                                | 0.430368000  | -0.078792000 | -0.065753000 |
| 6                                                                     | 1.952149000  | 2.331174000  | 0.873380000  | 6                                                | 1.224914000  | 0.729886000  | 0.766134000  |
| 6                                                                     | 3.472613000  | 1.695247000  | -0.901935000 | 6                                                | 1.071962000  | -0.967168000 | -0.943339000 |
| 1                                                                     | 1.164511000  | 2.069601000  | 1.581677000  | 1                                                | 0.743629000  | 1.422747000  | 1.458534000  |
| 1                                                                     | 3.863631000  | 0.940893000  | -1.586460000 | 1                                                | 0.473734000  | -1.600440000 | -1.600669000 |
| 6                                                                     | 2.455371000  | 3.632256000  | 0.831067000  | 6                                                | 2.615713000  | 0.653912000  | 0.709305000  |
| 6                                                                     | 3.981406000  | 2.994716000  | -0.924278000 | 6                                                | 2.465584000  | -1.045240000 | -0.975217000 |
| 1                                                                     | 2.053211000  | 4.383271000  | 1.515368000  | 1                                                | 3.200487000  | 1.298449000  | 1.370494000  |



|                                              |              |              |              |                                          |              |              |              |
|----------------------------------------------|--------------|--------------|--------------|------------------------------------------|--------------|--------------|--------------|
| 1                                            | 4.772981000  | 3.246420000  | -1.634257000 | 1                                        | 2.940008000  | -1.746731000 | -1.667411000 |
| 6                                            | 3.475367000  | 3.973429000  | -0.062910000 | 6                                        | 3.269953000  | -0.237497000 | -0.158257000 |
| 1                                            | 3.871188000  | 4.990748000  | -0.088342000 | 1                                        | -3.367341000 | 4.771817000  | 0.173155000  |
| 6                                            | -3.751754000 | -0.870100000 | 0.643491000  | 6                                        | 4.789096000  | -0.330304000 | -0.216379000 |
| 1                                            | -3.987361000 | -0.783416000 | 1.720781000  | 1                                        | 5.031947000  | -1.097589000 | -0.972606000 |
| 1                                            | -3.950533000 | -1.928637000 | 0.390898000  | 6                                        | 5.389037000  | -0.796949000 | 1.122168000  |
| 6                                            | -4.719384000 | 0.014782000  | -0.146393000 | 6                                        | 5.429067000  | 0.991123000  | -0.678512000 |
| 1                                            | -4.541214000 | 1.076548000  | 0.103910000  | 1                                        | 5.029823000  | 1.308795000  | -1.654771000 |
| 1                                            | -4.516002000 | -0.083922000 | -1.228274000 | 1                                        | 5.236639000  | 1.803709000  | 0.042200000  |
| 6                                            | -6.189567000 | -0.325668000 | 0.120577000  | 1                                        | 6.522453000  | 0.883442000  | -0.773655000 |
| 1                                            | -6.397092000 | -0.228621000 | 1.203191000  | 1                                        | 5.194065000  | -0.066882000 | 1.925746000  |
| 1                                            | -6.369827000 | -1.389187000 | -0.126384000 | 1                                        | 6.482270000  | -0.915977000 | 1.039841000  |
| 6                                            | -7.174533000 | 0.548562000  | -0.662722000 | 1                                        | 4.961991000  | -1.762356000 | 1.436780000  |
| 1                                            | -6.993558000 | 1.610963000  | -0.415249000 | 1                                        | -3.904943000 | -4.463287000 | -0.046399000 |
| 1                                            | -6.966417000 | 0.450796000  | -1.744313000 |                                          |              |              |              |
| 6                                            | -8.640277000 | 0.202682000  | -0.390796000 |                                          |              |              |              |
| 1                                            | -8.889102000 | 0.325391000  | 0.677246000  |                                          |              |              |              |
| 1                                            | -8.861653000 | -0.843783000 | -0.662065000 |                                          |              |              |              |
| 1                                            | -9.322212000 | 0.847770000  | -0.967899000 |                                          |              |              |              |
| 1                                            | 5.203865000  | -4.169856000 | -0.384055000 |                                          |              |              |              |
| D3-t-but<br>E(RB3LYP) = -906.998148614 a. u. |              |              |              | D3-OH<br>E(RB3LYP) = -824.967896125 a. u |              |              |              |
| 7                                            | -1.256360000 | -0.001309000 | -0.000911000 | 7                                        | 0.351758000  | -0.000020000 | 0.004654000  |
| 6                                            | -1.546812000 | -2.304161000 | 0.801216000  | 6                                        | 0.567461000  | 2.319725000  | 0.774944000  |
| 6                                            | -1.972424000 | -1.229177000 | -0.000326000 | 6                                        | 1.043129000  | 1.239522000  | 0.008190000  |
| 6                                            | -2.246681000 | -3.511636000 | 0.791586000  | 6                                        | 1.237347000  | 3.544097000  | 0.762965000  |
| 1                                            | -1.900703000 | -4.335023000 | 1.421131000  | 1                                        | 0.851509000  | 4.369499000  | 1.366258000  |
| 6                                            | -3.116903000 | -1.391857000 | -0.802180000 | 6                                        | 2.206630000  | 1.418824000  | -0.764019000 |
| 6                                            | -3.389531000 | -3.666722000 | 0.000476000  | 6                                        | 2.398858000  | 3.714787000  | 0.003218000  |
| 1                                            | -3.451559000 | -0.566580000 | -1.432625000 | 1                                        | 2.580598000  | 0.592693000  | -1.370662000 |
| 6                                            | -3.820165000 | -2.597431000 | -0.791398000 | 6                                        | 2.878201000  | 2.642018000  | -0.755578000 |
| 1                                            | -4.706795000 | -2.704565000 | -1.420994000 | 1                                        | 3.779383000  | 2.760097000  | -1.362258000 |
| 1                                            | -0.663065000 | -2.186285000 | 1.430202000  | 1                                        | -0.331806000 | 2.192491000  | 1.379536000  |
| 6                                            | -3.341336000 | 3.691582000  | 0.005142000  | 6                                        | 2.442513000  | -3.690388000 | -0.011259000 |
| 6                                            | -3.783553000 | 2.627496000  | 0.797764000  | 6                                        | 2.917733000  | -2.610254000 | 0.739915000  |
| 6                                            | -2.203344000 | 3.521864000  | -0.789721000 | 6                                        | 1.270389000  | -3.535106000 | -0.757728000 |
| 1                                            | -4.666626000 | 2.745974000  | 1.430324000  | 1                                        | 3.826968000  | -2.716347000 | 1.336686000  |
| 1                                            | -1.848457000 | 4.340961000  | -1.419914000 | 1                                        | 0.886902000  | -4.366541000 | -1.354136000 |
|                                              |              |              |              | 6                                        | 2.231877000  | -1.395213000 | 0.753720000  |

|                                                         |              |              |              |                                                                       |              |              |              |
|---------------------------------------------------------|--------------|--------------|--------------|-----------------------------------------------------------------------|--------------|--------------|--------------|
| 6                                                       | -3.096378000 | 1.412786000  | 0.805605000  | 6                                                                     | 0.585782000  | -2.318726000 | -0.764535000 |
| 6                                                       | -1.519566000 | 2.305119000  | -0.802419000 | 1                                                                     | 2.602481000  | -0.563705000 | 1.354984000  |
| 1                                                       | -3.439889000 | 0.591747000  | 1.436837000  | 1                                                                     | -0.322152000 | -2.204158000 | -1.358484000 |
| 1                                                       | -0.639780000 | 2.175953000  | -1.434740000 | 6                                                                     | 1.057565000  | -1.231581000 | -0.005549000 |
| 6                                                       | -1.956547000 | 1.235270000  | -0.000029000 | 6                                                                     | -1.075663000 | -0.008113000 | 0.003721000  |
| 6                                                       | 0.166577000  | -0.010216000 | -0.009757000 | 6                                                                     | -1.796379000 | 0.761347000  | -0.921483000 |
| 6                                                       | 0.879341000  | -0.884456000 | -0.842523000 | 6                                                                     | -1.790132000 | -0.786344000 | 0.931321000  |
| 6                                                       | 0.898115000  | 0.857634000  | 0.819790000  | 1                                                                     | -1.257316000 | 1.368976000  | -1.650293000 |
| 1                                                       | 0.335232000  | -1.565460000 | -1.499239000 | 1                                                                     | -1.242139000 | -1.387922000 | 1.658672000  |
| 1                                                       | 0.367117000  | 1.544437000  | 1.481181000  | 6                                                                     | -3.192348000 | 0.764450000  | -0.912975000 |
| 6                                                       | 2.276877000  | -0.895200000 | -0.837174000 | 6                                                                     | -3.182669000 | -0.804632000 | 0.928409000  |
| 6                                                       | 2.290779000  | 0.847637000  | 0.801112000  | 1                                                                     | -3.737987000 | 1.374705000  | -1.639409000 |
| 1                                                       | 2.781865000  | -1.595173000 | -1.502857000 | 1                                                                     | -3.739134000 | -1.410333000 | 1.645717000  |
| 1                                                       | 2.817024000  | 1.539266000  | 1.462733000  | 6                                                                     | -3.894917000 | -0.023033000 | 0.008158000  |
| 6                                                       | 3.022728000  | -0.029497000 | -0.022149000 | 8                                                                     | -5.259734000 | -0.070182000 | 0.058897000  |
| 1                                                       | -3.938404000 | -4.610651000 | 0.000909000  | 1                                                                     | -5.616072000 | 0.513121000  | -0.627106000 |
| 6                                                       | 4.562422000  | -0.010231000 | 0.000392000  | 1                                                                     | 2.923708000  | 4.672236000  | 0.001461000  |
| 6                                                       | 5.066899000  | 1.394074000  | -0.405807000 | 1                                                                     | 2.978365000  | -4.641628000 | -0.013331000 |
| 1                                                       | 4.733261000  | 1.653669000  | -1.423482000 |                                                                       |              |              |              |
| 1                                                       | 4.698677000  | 2.175433000  | 0.276898000  |                                                                       |              |              |              |
| 1                                                       | 6.169248000  | 1.427613000  | -0.388329000 |                                                                       |              |              |              |
| 6                                                       | 5.060820000  | -0.339321000 | 1.426980000  |                                                                       |              |              |              |
| 1                                                       | 4.691916000  | 0.386644000  | 2.168017000  |                                                                       |              |              |              |
| 1                                                       | 4.723271000  | -1.340117000 | 1.741293000  |                                                                       |              |              |              |
| 1                                                       | 6.163093000  | -0.323019000 | 1.463560000  |                                                                       |              |              |              |
| 6                                                       | 5.172195000  | -1.038182000 | -0.969905000 |                                                                       |              |              |              |
| 1                                                       | 6.271673000  | -0.989263000 | -0.920874000 |                                                                       |              |              |              |
| 1                                                       | 4.875406000  | -2.068498000 | -0.717384000 |                                                                       |              |              |              |
| 1                                                       | 4.878591000  | -0.842882000 | -2.013494000 |                                                                       |              |              |              |
| 1                                                       | -3.877660000 | 4.642733000  | 0.007185000  |                                                                       |              |              |              |
| D3-OCH <sub>3</sub><br>E(RB3LYP) = -864.269310659 a. u. |              |              |              | D3-OC <sub>2</sub> H <sub>5</sub><br>E(RB3LYP) = -903.589386919 a. u. |              |              |              |
| 7                                                       | 0.691920000  | 0.004195000  | 0.027806000  | 7                                                                     | 1.076397000  | 0.002703000  | 0.028799000  |
| 6                                                       | 0.788465000  | 2.329044000  | 0.806966000  | 6                                                                     | 1.196471000  | 2.327277000  | 0.805196000  |
| 6                                                       | 1.300658000  | 1.286418000  | 0.012310000  | 6                                                                     | 1.696792000  | 1.279156000  | 0.010140000  |
| 6                                                       | 1.376936000  | 3.594220000  | 0.777909000  | 6                                                                     | 1.796176000  | 3.587078000  | 0.772929000  |
| 1                                                       | 0.964062000  | 4.389454000  | 1.403426000  | 1                                                                     | 1.392348000  | 4.386647000  | 1.398837000  |
| 6                                                       | 2.416969000  | 1.545098000  | -0.805515000 | 6                                                                     | 2.812768000  | 1.527096000  | -0.811534000 |

|                                                        |              |              |              |                                                                         |              |              |              |
|--------------------------------------------------------|--------------|--------------|--------------|-------------------------------------------------------------------------|--------------|--------------|--------------|
| 6                                                      | 2.492588000  | 3.844126000  | -0.027389000 | 6                                                                       | 2.911472000  | 3.826197000  | -0.036132000 |
| 1                                                      | 2.817825000  | 0.748312000  | -1.433857000 | 1                                                                       | 3.204465000  | 0.726192000  | -1.440410000 |
| 6                                                      | 3.008182000  | 2.809163000  | -0.814309000 | 6                                                                       | 3.415212000  | 2.785811000  | -0.823580000 |
| 1                                                      | 3.873926000  | 2.988897000  | -1.456432000 | 1                                                                       | 4.280428000  | 2.957094000  | -1.468728000 |
| 1                                                      | -0.075149000 | 2.140261000  | 1.446434000  | 1                                                                       | 0.333103000  | 2.146960000  | 1.447420000  |
| 6                                                      | 3.019297000  | -3.539650000 | -0.091818000 | 6                                                                       | 3.368369000  | -3.563859000 | -0.100327000 |
| 6                                                      | 3.451377000  | -2.432977000 | 0.646749000  | 6                                                                       | 3.815852000  | -2.460431000 | 0.633912000  |
| 6                                                      | 1.811051000  | -3.459635000 | -0.791021000 | 6                                                                       | 2.156568000  | -3.472902000 | -0.792011000 |
| 1                                                      | 4.388452000  | -2.480685000 | 1.206872000  | 1                                                                       | 4.755890000  | -2.516541000 | 1.188276000  |
| 1                                                      | 1.460120000  | -4.312531000 | -1.377108000 | 1                                                                       | 1.793557000  | -4.323126000 | -1.374627000 |
| 6                                                      | 2.687964000  | -1.266056000 | 0.694620000  | 6                                                                       | 3.064268000  | -1.285995000 | 0.684865000  |
| 6                                                      | 1.047939000  | -2.291184000 | -0.763821000 | 6                                                                       | 1.405114000  | -2.297010000 | -0.761691000 |
| 1                                                      | 3.026329000  | -0.413887000 | 1.285884000  | 1                                                                       | 3.414719000  | -0.436445000 | 1.272837000  |
| 1                                                      | 0.111931000  | -2.234673000 | -1.321432000 | 1                                                                       | 0.466153000  | -2.232132000 | -1.313376000 |
| 6                                                      | 1.476389000  | -1.177770000 | -0.017242000 | 6                                                                       | 1.849129000  | -1.186697000 | -0.019528000 |
| 6                                                      | -0.730819000 | -0.098117000 | 0.078807000  | 6                                                                       | -0.347215000 | -0.086172000 | 0.086876000  |
| 6                                                      | -1.535807000 | 0.628539000  | -0.806851000 | 6                                                                       | -1.149658000 | 0.644158000  | -0.798018000 |
| 6                                                      | -1.357340000 | -0.930645000 | 1.025254000  | 6                                                                       | -0.977118000 | -0.908793000 | 1.039443000  |
| 1                                                      | -1.065888000 | 1.276851000  | -1.548568000 | 1                                                                       | -0.677140000 | 1.285094000  | -1.544525000 |
| 1                                                      | -0.745109000 | -1.502062000 | 1.725176000  | 1                                                                       | -0.367192000 | -1.483130000 | 1.739024000  |
| 6                                                      | -2.931439000 | 0.545895000  | -0.751137000 | 6                                                                       | -2.545676000 | 0.574816000  | -0.735917000 |
| 6                                                      | -2.742296000 | -1.035618000 | 1.072248000  | 6                                                                       | -2.362831000 | -1.000508000 | 1.092802000  |
| 1                                                      | -3.523270000 | 1.131469000  | -1.454139000 | 1                                                                       | -3.134530000 | 1.163215000  | -1.438876000 |
| 1                                                      | -3.234120000 | -1.680746000 | 1.802445000  | 1                                                                       | -2.857015000 | -1.638211000 | 1.827929000  |
| 6                                                      | -3.544816000 | -0.294414000 | 0.188172000  | 6                                                                       | -3.163638000 | -0.255937000 | 0.209642000  |
| 8                                                      | -4.893097000 | -0.461668000 | 0.326869000  | 8                                                                       | -4.511801000 | -0.410006000 | 0.354895000  |
| 6                                                      | -5.749800000 | 0.260976000  | -0.541128000 | 6                                                                       | -5.383328000 | 0.315242000  | -0.511286000 |
| 1                                                      | -5.625701000 | 1.352907000  | -0.424231000 | 1                                                                       | -5.178263000 | 0.045015000  | -1.564427000 |
| 1                                                      | -5.581908000 | -0.007233000 | -1.599987000 | 1                                                                       | -5.204421000 | 1.401660000  | -0.402093000 |
| 1                                                      | -6.773539000 | -0.017060000 | -0.257813000 | 6                                                                       | -6.807349000 | -0.041163000 | -0.127544000 |
| 1                                                      | 2.954108000  | 4.833558000  | -0.042523000 | 1                                                                       | -7.007047000 | 0.232229000  | 0.920088000  |
| 1                                                      | 3.616271000  | -4.453330000 | -0.120563000 | 1                                                                       | -6.980908000 | -1.122456000 | -0.240825000 |
|                                                        |              |              |              | 1                                                                       | -7.520709000 | 0.496803000  | -0.771387000 |
|                                                        |              |              |              | 1                                                                       | 3.381756000  | 4.811453000  | -0.053813000 |
|                                                        |              |              |              | 1                                                                       | 3.956164000  | -4.483393000 | -0.131482000 |
| D3-NH <sub>2</sub><br>E(RB3LYP) = -805.101132202 a. u. |              |              |              | D3-N(CH <sub>3</sub> ) <sub>2</sub><br>E(RB3LYP) = -883.711453255 a. u. |              |              |              |
| 7                                                      | 0.366808000  | 0.000406000  | 0.000880000  | 7                                                                       | -1.007178000 | 0.001184000  | 0.006603000  |
| 6                                                      | -1.783571000 | 0.719452000  | -0.963545000 | 6                                                                       | 1.139399000  | -0.781817000 | -0.918634000 |

|   |              |              |              |   |              |              |              |
|---|--------------|--------------|--------------|---|--------------|--------------|--------------|
| 6 | -1.062748000 | -0.004519000 | -0.001254000 | 6 | 0.422309000  | -0.025578000 | 0.019298000  |
| 6 | -3.176901000 | 0.725346000  | -0.959666000 | 6 | 2.531729000  | -0.818656000 | -0.906305000 |
| 1 | -3.716129000 | 1.297775000  | -1.719515000 | 1 | 3.038351000  | -1.420691000 | -1.659073000 |
| 6 | -1.781163000 | -0.732337000 | 0.960044000  | 6 | 1.151351000  | 0.709336000  | 0.964660000  |
| 6 | -3.900748000 | -0.013283000 | -0.004270000 | 6 | 3.277872000  | -0.084698000 | 0.047797000  |
| 1 | -1.237227000 | -1.298020000 | 1.718947000  | 1 | 0.616933000  | 1.313107000  | 1.700857000  |
| 6 | -3.174367000 | -0.746752000 | 0.953220000  | 6 | 2.544356000  | 0.697446000  | 0.972780000  |
| 1 | -3.711772000 | -1.327611000 | 1.707990000  | 1 | 3.060693000  | 1.296448000  | 1.721311000  |
| 1 | -1.241643000 | 1.292007000  | -1.718717000 | 1 | 0.595231000  | -1.354797000 | -1.672092000 |
| 6 | 2.431160000  | -3.705487000 | -0.007152000 | 6 | -2.987526000 | 3.750648000  | -0.117579000 |
| 6 | 1.250812000  | -3.546940000 | -0.740116000 | 6 | -1.803932000 | 3.546847000  | -0.833747000 |
| 6 | 2.923539000  | -2.622307000 | 0.728296000  | 6 | -3.511357000 | 2.697988000  | 0.640104000  |
| 1 | 0.852794000  | -4.380523000 | -1.324004000 | 1 | -1.381470000 | 4.356043000  | -1.434622000 |
| 1 | 3.838957000  | -2.730142000 | 1.315344000  | 1 | -4.429757000 | 2.841362000  | 1.214825000  |
| 6 | 0.575591000  | -2.325567000 | -0.749259000 | 6 | -1.156408000 | 2.310853000  | -0.804508000 |
| 6 | 2.247937000  | -1.401450000 | 0.739240000  | 6 | -2.863722000 | 1.463070000  | 0.689168000  |
| 1 | -0.339647000 | -2.209333000 | -1.331411000 | 1 | -0.238077000 | 2.159220000  | -1.373517000 |
| 1 | 2.633171000  | -0.568574000 | 1.329216000  | 1 | -3.273427000 | 0.654530000  | 1.296288000  |
| 6 | 1.065545000  | -1.234092000 | -0.007311000 | 6 | -1.677919000 | 1.249468000  | -0.040459000 |
| 6 | 1.057532000  | 1.238717000  | 0.008733000  | 6 | -1.724251000 | -1.221473000 | 0.040008000  |
| 6 | 0.561174000  | 2.327521000  | 0.750569000  | 6 | -1.254186000 | -2.302942000 | 0.809315000  |
| 6 | 2.239018000  | 1.414037000  | -0.737768000 | 6 | -2.905704000 | -1.389658000 | -0.708349000 |
| 1 | -0.353127000 | 2.205316000  | 1.333054000  | 1 | -0.339860000 | -2.186588000 | 1.392874000  |
| 1 | 2.629427000  | 0.583488000  | -1.327655000 | 1 | -3.275879000 | -0.565400000 | -1.319696000 |
| 6 | 1.228589000  | 3.553202000  | 0.741454000  | 6 | -1.947306000 | -3.514169000 | 0.825315000  |
| 6 | 2.906855000  | 2.639060000  | -0.726918000 | 6 | -3.599141000 | -2.599904000 | -0.672457000 |
| 1 | 0.825636000  | 4.384297000  | 1.325595000  | 1 | -1.564334000 | -4.339625000 | 1.430524000  |
| 1 | 3.821505000  | 2.752703000  | -1.314092000 | 1 | -4.513178000 | -2.708053000 | -1.261676000 |
| 6 | 2.407772000  | 3.719190000  | 0.008489000  | 6 | -3.126378000 | -3.672742000 | 0.090469000  |
| 7 | -5.297565000 | -0.070998000 | -0.046797000 | 7 | 4.668187000  | -0.136786000 | 0.080231000  |
| 1 | -5.737397000 | 0.737986000  | -0.476377000 | 6 | 5.379661000  | -0.747064000 | -1.027508000 |
| 1 | -5.735131000 | -0.285030000 | 0.845023000  | 1 | 5.200702000  | -0.236316000 | -1.995955000 |
| 1 | 2.930188000  | 4.677981000  | 0.008505000  | 1 | 6.457630000  | -0.720460000 | -0.820302000 |
| 1 | 2.959520000  | -4.660928000 | -0.007189000 | 1 | 5.094380000  | -1.805162000 | -1.149729000 |
|   |              |              |              | 6 | 5.392317000  | 0.802775000  | 0.916016000  |
|   |              |              |              | 1 | 6.468514000  | 0.600963000  | 0.834064000  |
|   |              |              |              | 1 | 5.216445000  | 1.861789000  | 0.636012000  |
|   |              |              |              | 1 | 5.115964000  | 0.687246000  | 1.977180000  |
|   |              |              |              | 1 | -3.668735000 | -4.620209000 | 0.110119000  |
|   |              |              |              | 1 | -3.494172000 | 4.717432000  | -0.147532000 |

| D3-PhCH <sub>3</sub><br>E(RB3LYP) = -1020.13104195 a. u. |              |              |              | D3-PhNH <sub>2</sub><br>E(RB3LYP) = -1036.17330739 a. u. |              |              |              |
|----------------------------------------------------------|--------------|--------------|--------------|----------------------------------------------------------|--------------|--------------|--------------|
| 7                                                        | 2.101887000  | 0.000242000  | -0.000514000 | 7                                                        | 2.100787000  | 0.000127000  | 0.000515000  |
| 6                                                        | -0.040052000 | 0.914142000  | -0.787386000 | 6                                                        | -0.041896000 | 0.886238000  | -0.819759000 |
| 6                                                        | 0.682160000  | -0.000706000 | -0.000313000 | 6                                                        | 0.678600000  | -0.000035000 | -0.000445000 |
| 6                                                        | -1.432959000 | 0.914309000  | -0.777068000 | 6                                                        | -1.435078000 | 0.886198000  | -0.812376000 |
| 1                                                        | -1.963486000 | 1.619469000  | -1.420524000 | 1                                                        | -1.964222000 | 1.566621000  | -1.483070000 |
| 6                                                        | -0.038712000 | -0.916366000 | 0.787098000  | 6                                                        | -0.042696000 | -0.886684000 | 0.817769000  |
| 6                                                        | -2.166406000 | -0.002430000 | 0.000149000  | 6                                                        | -2.171310000 | -0.000779000 | -0.002662000 |
| 1                                                        | 0.501217000  | -1.624519000 | 1.417596000  | 1                                                        | 0.497224000  | -1.572720000 | 1.472602000  |
| 6                                                        | -1.431591000 | -0.918091000 | 0.777364000  | 6                                                        | -1.435863000 | -0.887371000 | 0.808153000  |
| 1                                                        | -1.961258000 | -1.623581000 | 1.421158000  | 1                                                        | -1.965571000 | -1.568549000 | 1.477665000  |
| 1                                                        | 0.498822000  | 1.623069000  | -1.417919000 | 1                                                        | 0.498648000  | 1.572332000  | -1.474012000 |
| 6                                                        | 4.229672000  | -3.667821000 | -0.022327000 | 6                                                        | 4.211302000  | -3.677889000 | -0.043359000 |
| 6                                                        | 3.102900000  | -3.498515000 | -0.833377000 | 6                                                        | 3.072354000  | -3.505056000 | -0.836352000 |
| 6                                                        | 4.646046000  | -2.612810000 | 0.795913000  | 6                                                        | 4.645844000  | -2.622015000 | 0.764325000  |
| 1                                                        | 2.769300000  | -4.310703000 | -1.483723000 | 1                                                        | 2.723514000  | -4.317666000 | -1.478194000 |
| 1                                                        | 5.520372000  | -2.731740000 | 1.440340000  | 1                                                        | 5.529533000  | -2.743203000 | 1.395520000  |
| 6                                                        | 2.404306000  | -2.290195000 | -0.836234000 | 6                                                        | 2.379970000  | -2.293210000 | -0.832232000 |
| 6                                                        | 3.943556000  | -1.406825000 | 0.813249000  | 6                                                        | 3.950199000  | -1.412316000 | 0.788765000  |
| 1                                                        | 1.533725000  | -2.159944000 | -1.481021000 | 1                                                        | 1.499334000  | -2.161308000 | -1.462794000 |
| 1                                                        | 4.266208000  | -0.591976000 | 1.463271000  | 1                                                        | 4.287634000  | -0.597625000 | 1.431400000  |
| 6                                                        | 2.815193000  | -1.230475000 | -0.007653000 | 6                                                        | 2.809497000  | -1.231787000 | -0.014824000 |
| 6                                                        | 2.813546000  | 1.231875000  | 0.007200000  | 6                                                        | 2.809197000  | 1.232256000  | 0.016486000  |
| 6                                                        | 2.401258000  | 2.290751000  | 0.836142000  | 6                                                        | 2.378463000  | 2.293645000  | 0.833284000  |
| 6                                                        | 3.941734000  | 1.409991000  | -0.813586000 | 6                                                        | 3.950740000  | 1.412928000  | -0.785842000 |
| 1                                                        | 1.530804000  | 2.159157000  | 1.480836000  | 1                                                        | 1.497109000  | 2.161538000  | 1.462792000  |
| 1                                                        | 4.265428000  | 0.595772000  | -1.463889000 | 1                                                        | 4.289051000  | 0.598281000  | -1.428055000 |
| 6                                                        | 3.098310000  | 3.499985000  | 0.833792000  | 6                                                        | 3.070529000  | 3.505668000  | 0.838040000  |
| 6                                                        | 4.642682000  | 2.616857000  | -0.795763000 | 6                                                        | 4.646030000  | 2.622819000  | -0.760778000 |
| 1                                                        | 2.763598000  | 4.311475000  | 1.484431000  | 1                                                        | 2.720745000  | 4.318318000  | 1.479323000  |
| 1                                                        | 5.516896000  | 2.737157000  | -1.440080000 | 1                                                        | 5.530338000  | 2.744178000  | -1.391061000 |
| 6                                                        | 4.224889000  | 3.671009000  | 0.022868000  | 6                                                        | 4.210332000  | 3.678700000  | 0.046294000  |
| 6                                                        | -3.650681000 | -0.003685000 | 0.000076000  | 6                                                        | -3.654212000 | -0.000974000 | -0.004127000 |
| 6                                                        | -4.383344000 | 1.196351000  | -0.089340000 | 6                                                        | -4.390914000 | 1.189464000  | -0.155057000 |
| 6                                                        | -4.381593000 | -1.201478000 | 0.089388000  | 6                                                        | -4.391250000 | -1.191208000 | 0.147070000  |
| 1                                                        | -3.851421000 | 2.149334000  | -0.132607000 | 1                                                        | -3.862245000 | 2.140942000  | -0.245891000 |
| 1                                                        | -3.850628000 | -2.154957000 | 0.132552000  | 1                                                        | -3.862871000 | -2.142405000 | 0.242374000  |
| 6                                                        | -5.776892000 | 1.193677000  | -0.089930000 | 6                                                        | -5.783381000 | 1.195609000  | -0.155475000 |
| 6                                                        | -5.778167000 | -1.198765000 | 0.090512000  | 6                                                        | -5.783664000 | -1.196900000 | 0.147874000  |

|   |              |              |              |   |              |              |              |
|---|--------------|--------------|--------------|---|--------------|--------------|--------------|
| 1 | -6.312735000 | 2.145320000  | -0.152006000 | 1 | -6.320940000 | 2.141601000  | -0.266423000 |
| 1 | -6.314161000 | -2.149835000 | 0.153326000  | 1 | -6.321683000 | -2.143223000 | 0.253188000  |
| 6 | -6.505156000 | -0.003987000 | 0.000376000  | 6 | -6.509907000 | -0.000532000 | -0.003968000 |
| 6 | -8.014752000 | 0.006132000  | -0.000465000 | 7 | -7.904964000 | -0.008973000 | -0.067969000 |
| 1 | -8.412997000 | 0.454778000  | -0.926420000 | 1 | -8.345065000 | 0.870789000  | 0.185546000  |
| 1 | -8.425477000 | -1.011017000 | 0.083022000  | 1 | -8.345864000 | -0.787551000 | 0.413087000  |
| 1 | -8.412564000 | 0.599571000  | 0.840216000  | 1 | 4.752999000  | 4.626147000  | 0.057838000  |
| 1 | 4.771746000  | 4.616086000  | 0.028952000  | 1 | 4.754262000  | -4.625192000 | -0.054482000 |
| 1 | 4.777726000  | -4.612196000 | -0.028032000 |   |              |              |              |

**Table S6.** Cartesian coordinates (in Angstrom unit) of B3LYP/cc-pVDZ geometries of D4 based donor systems.

| D4<br>E(RB3LYP) = -517.504742141 a. u. |              |              |              | D4-CH <sub>3</sub><br>E(RB3LYP) = -556.822087110 a. u. |              |              |              |
|----------------------------------------|--------------|--------------|--------------|--------------------------------------------------------|--------------|--------------|--------------|
| 6                                      | 2.484393000  | 1.223499000  | 0.000001000  | 6                                                      | -2.859856000 | -1.295608000 | -0.000203000 |
| 6                                      | 1.133787000  | 0.856817000  | -0.000003000 | 6                                                      | -1.527008000 | -0.869668000 | -0.000184000 |
| 6                                      | 0.726133000  | -0.506712000 | -0.000003000 | 6                                                      | -1.178850000 | 0.510851000  | -0.000181000 |
| 6                                      | 1.702434000  | -1.513612000 | -0.000003000 | 6                                                      | -2.199199000 | 1.473185000  | -0.000256000 |
| 6                                      | 3.049786000  | -1.154266000 | 0.000001000  | 6                                                      | -3.529582000 | 1.054499000  | -0.000270000 |
| 6                                      | 3.433533000  | 0.200786000  | 0.000004000  | 6                                                      | -3.853602000 | -0.315850000 | -0.000225000 |
| 7                                      | 0.000000000  | 1.655193000  | -0.000014000 | 7                                                      | -0.358484000 | -1.617079000 | -0.000335000 |
| 6                                      | -0.726134000 | -0.506711000 | -0.000005000 | 6                                                      | 0.271487000  | 0.572432000  | -0.000065000 |
| 1                                      | 2.787389000  | 2.273092000  | 0.000002000  | 1                                                      | -3.115830000 | -2.357665000 | -0.000197000 |
| 1                                      | 1.410772000  | -2.566447000 | -0.000006000 | 1                                                      | -1.954756000 | 2.538006000  | -0.000284000 |
| 1                                      | 3.818214000  | -1.929999000 | 0.000001000  | 1                                                      | -4.331264000 | 1.795846000  | -0.000314000 |
| 6                                      | -2.484393000 | 1.223499000  | 0.000008000  | 6                                                      | 2.103798000  | -1.080047000 | 0.000197000  |
| 6                                      | -3.433533000 | 0.200787000  | 0.000009000  | 6                                                      | 3.030800000  | -0.033558000 | 0.000328000  |
| 6                                      | -1.133786000 | 0.856818000  | 0.000001000  | 6                                                      | 0.738452000  | -0.769184000 | 0.000001000  |
| 1                                      | -4.495045000 | 0.458516000  | 0.000015000  | 6                                                      | 2.569900000  | 1.304998000  | 0.000211000  |
| 6                                      | -3.049786000 | -1.154266000 | 0.000001000  | 1                                                      | 3.304096000  | 2.114752000  | 0.000282000  |
| 1                                      | -3.818215000 | -1.929999000 | 0.000002000  | 6                                                      | 1.212690000  | 1.613085000  | 0.000010000  |
| 6                                      | -1.702434000 | -1.513612000 | -0.000007000 | 1                                                      | 0.885643000  | 2.655576000  | -0.000070000 |
| 1                                      | -1.410770000 | -2.566446000 | -0.000011000 | 1                                                      | 2.442223000  | -2.119557000 | 0.000246000  |
| 1                                      | -2.787390000 | 2.273092000  | 0.000011000  | 1                                                      | -0.313838000 | -2.626040000 | 0.000971000  |
| 1                                      | 0.000001000  | 2.665157000  | 0.000052000  | 6                                                      | 4.514699000  | -0.316270000 | 0.000611000  |
| 1                                      | 4.495045000  | 0.458516000  | 0.000007000  | 1                                                      | 5.005214000  | 0.120763000  | 0.886994000  |
|                                        |              |              |              | 1                                                      | 4.722609000  | -1.396625000 | 0.000265000  |
|                                        |              |              |              | 1                                                      | 5.005683000  | 0.121433000  | -0.885177000 |
|                                        |              |              |              | 1                                                      | -4.902762000 | -0.620131000 | -0.000223000 |

| D4-C <sub>5</sub> H <sub>11</sub><br>E(RB3LYP) = -714.078236957 a. u. |              |              |              | D4-isopropyl<br>E(RB3LYP) = -635.449498257 a. u. |              |              |              |
|-----------------------------------------------------------------------|--------------|--------------|--------------|--------------------------------------------------|--------------|--------------|--------------|
| 6                                                                     | 4.248453000  | -1.841306000 | -0.000079000 | 6                                                | -3.461066000 | -1.452126000 | -0.000103000 |
| 6                                                                     | 3.080337000  | -1.070876000 | -0.000055000 | 6                                                | -2.173006000 | -0.905612000 | -0.000087000 |
| 6                                                                     | 3.118446000  | 0.352583000  | -0.000098000 | 6                                                | -1.953806000 | 0.500966000  | -0.000053000 |
| 6                                                                     | 4.361145000  | 1.003049000  | -0.000165000 | 6                                                | -3.057906000 | 1.365502000  | -0.000049000 |
| 6                                                                     | 5.528704000  | 0.240152000  | -0.000189000 | 6                                                | -4.344401000 | 0.826467000  | -0.000063000 |
| 6                                                                     | 5.470116000  | -1.166823000 | -0.000149000 | 6                                                | -4.540740000 | -0.567734000 | -0.000085000 |
| 7                                                                     | 1.753405000  | -1.474087000 | 0.000009000  | 7                                                | -0.940946000 | -1.542952000 | -0.000148000 |
| 6                                                                     | 1.738819000  | 0.803318000  | -0.000047000 | 6                                                | -0.514906000 | 0.696196000  | -0.000017000 |
| 1                                                                     | 4.207707000  | -2.933032000 | -0.000047000 | 1                                                | -3.618466000 | -2.533180000 | -0.000129000 |
| 1                                                                     | 4.413809000  | 2.094304000  | -0.000193000 | 1                                                | -2.912106000 | 2.448240000  | -0.000028000 |
| 1                                                                     | 6.501019000  | 0.737067000  | -0.000237000 | 1                                                | -5.210820000 | 1.490962000  | -0.000055000 |
| 6                                                                     | -0.473137000 | -0.296667000 | 0.000038000  | 6                                                | 1.460038000  | -0.783822000 | 0.000010000  |
| 6                                                                     | -1.086862000 | 0.959444000  | 0.000033000  | 6                                                | 2.291592000  | 0.344451000  | 0.000077000  |
| 6                                                                     | 0.926639000  | -0.360627000 | -0.000004000 | 6                                                | 0.074755000  | -0.598300000 | -0.000037000 |
| 6                                                                     | -0.278384000 | 2.123751000  | -0.000007000 | 6                                                | 1.707914000  | 1.631498000  | 0.000083000  |
| 1                                                                     | -0.768526000 | 3.101006000  | -0.000010000 | 1                                                | 2.364458000  | 2.505157000  | 0.000129000  |
| 6                                                                     | 1.110677000  | 2.058593000  | -0.000046000 | 6                                                | 0.325866000  | 1.816529000  | 0.000035000  |
| 1                                                                     | 1.704242000  | 2.975901000  | -0.000084000 | 1                                                | -0.093382000 | 2.825440000  | 0.000045000  |
| 1                                                                     | -1.063823000 | -1.213936000 | 0.000077000  | 1                                                | 1.882163000  | -1.791797000 | -0.000006000 |
| 1                                                                     | 1.437397000  | -2.433324000 | 0.000020000  | 1                                                | -0.804491000 | -2.543619000 | 0.000166000  |
| 6                                                                     | -2.597087000 | 1.131308000  | 0.000083000  | 6                                                | 3.809318000  | 0.195905000  | 0.000128000  |
| 1                                                                     | -2.874775000 | 1.744731000  | -0.877384000 | 1                                                | 4.227492000  | 1.217461000  | 0.000208000  |
| 1                                                                     | -2.874721000 | 1.744698000  | 0.877590000  | 6                                                | 4.320295000  | -0.509216000 | -1.269020000 |
| 6                                                                     | -3.445005000 | -0.142815000 | 0.000086000  | 6                                                | 4.320205000  | -0.509377000 | 1.269220000  |
| 1                                                                     | -3.193819000 | -0.757202000 | -0.883793000 | 1                                                | 3.985099000  | 0.013276000  | 2.179033000  |
| 1                                                                     | -3.193771000 | -0.757230000 | 0.883932000  | 1                                                | 3.954451000  | -1.548524000 | 1.326473000  |
| 6                                                                     | -4.950560000 | 0.143996000  | 0.000132000  | 1                                                | 5.422432000  | -0.544376000 | 1.279573000  |
| 1                                                                     | -5.205670000 | 0.760845000  | -0.882365000 | 1                                                | 3.954533000  | -1.548351000 | -1.326434000 |
| 1                                                                     | -5.205621000 | 0.760815000  | 0.882665000  | 1                                                | 5.422522000  | -0.544223000 | -1.279296000 |
| 6                                                                     | -5.816635000 | -1.120102000 | 0.000135000  | 1                                                | 3.985259000  | 0.013559000  | -2.178789000 |
| 1                                                                     | -5.560926000 | -1.735705000 | -0.882191000 | 1                                                | -5.557433000 | -0.967332000 | -0.000092000 |
| 1                                                                     | -5.560874000 | -1.735739000 | 0.882422000  |                                                  |              |              |              |
| 6                                                                     | -7.318462000 | -0.825927000 | 0.000185000  |                                                  |              |              |              |
| 1                                                                     | -7.611924000 | -0.241790000 | -0.888792000 |                                                  |              |              |              |
| 1                                                                     | -7.611871000 | -0.241827000 | 0.889204000  |                                                  |              |              |              |
| 1                                                                     | -7.912838000 | -1.753814000 | 0.000183000  |                                                  |              |              |              |
| 1                                                                     | 6.397922000  | -1.743470000 | -0.000168000 |                                                  |              |              |              |

| D4-t-but<br>E(RB3LYP) = -674.759728612 a. u. |              |              |              | D4-OH<br>E(RB3LYP) = -592.730528897 a. u |              |              |              |
|----------------------------------------------|--------------|--------------|--------------|------------------------------------------|--------------|--------------|--------------|
| 6                                            | 3.830184000  | -1.364250000 | 0.000023000  | 6                                        | 2.836453000  | -1.290837000 | -0.000028000 |
| 6                                            | 2.519077000  | -0.875683000 | -0.000023000 | 6                                        | 1.504599000  | -0.866444000 | -0.000011000 |
| 6                                            | 2.238384000  | 0.519998000  | -0.000024000 | 6                                        | 1.152132000  | 0.512417000  | -0.000018000 |
| 6                                            | 3.302707000  | 1.432766000  | 0.000005000  | 6                                        | 2.171046000  | 1.475835000  | -0.000041000 |
| 6                                            | 4.611929000  | 0.951362000  | 0.000052000  | 6                                        | 3.502744000  | 1.058967000  | -0.000057000 |
| 6                                            | 4.869697000  | -0.432782000 | 0.000066000  | 6                                        | 3.830244000  | -0.309663000 | -0.000051000 |
| 7                                            | 1.316594000  | -1.567057000 | -0.000120000 | 7                                        | 0.335138000  | -1.617606000 | 0.000016000  |
| 6                                            | 0.792089000  | 0.650901000  | -0.000047000 | 6                                        | -0.298510000 | 0.570186000  | -0.000003000 |
| 1                                            | 4.035643000  | -2.437220000 | 0.000025000  | 1                                        | 3.093563000  | -2.352706000 | -0.000023000 |
| 1                                            | 3.108651000  | 2.507886000  | -0.000002000 | 1                                        | 1.925680000  | 2.540440000  | -0.000047000 |
| 1                                            | 5.448124000  | 1.653510000  | 0.000080000  | 1                                        | 4.302493000  | 1.802500000  | -0.000076000 |
| 6                                            | -1.114210000 | -0.913667000 | -0.000063000 | 6                                        | -2.125371000 | -1.092332000 | 0.000039000  |
| 6                                            | -2.007136000 | 0.170413000  | -0.000053000 | 6                                        | -3.037914000 | -0.032831000 | 0.000045000  |
| 6                                            | 0.260068000  | -0.667370000 | -0.000060000 | 6                                        | -0.761938000 | -0.773639000 | 0.000022000  |
| 6                                            | -1.476129000 | 1.481268000  | -0.000032000 | 6                                        | -2.600284000 | 1.309501000  | 0.000023000  |
| 1                                            | -2.149614000 | 2.336845000  | -0.000017000 | 1                                        | -3.356018000 | 2.095922000  | 0.000032000  |
| 6                                            | -0.102088000 | 1.726813000  | -0.000040000 | 6                                        | -1.242390000 | 1.608604000  | -0.000004000 |
| 1                                            | 0.266503000  | 2.755347000  | -0.000031000 | 1                                        | -0.917189000 | 2.651407000  | -0.000019000 |
| 1                                            | -1.480985000 | -1.942317000 | -0.000059000 | 1                                        | -2.469160000 | -2.130820000 | 0.000033000  |
| 1                                            | 1.224758000  | -2.572793000 | 0.000236000  | 1                                        | 0.293958000  | -2.626643000 | -0.000011000 |
| 6                                            | -3.525528000 | -0.104209000 | 0.000024000  | 8                                        | -4.390044000 | -0.234493000 | 0.000039000  |
| 6                                            | -4.357175000 | 1.191674000  | 0.000476000  | 1                                        | -4.563508000 | -1.187094000 | 0.000249000  |
| 1                                            | -4.159980000 | 1.806643000  | 0.892571000  | 1                                        | 4.879701000  | -0.612404000 | -0.000065000 |
| 1                                            | -4.159856000 | 1.807334000  | -0.891117000 |                                          |              |              |              |
| 1                                            | -5.430381000 | 0.942866000  | 0.000314000  |                                          |              |              |              |
| 6                                            | -3.903722000 | -0.914616000 | -1.261702000 |                                          |              |              |              |
| 1                                            | -3.648939000 | -0.358346000 | -2.178124000 |                                          |              |              |              |
| 1                                            | -3.379674000 | -1.882135000 | -1.301042000 |                                          |              |              |              |
| 1                                            | -4.987170000 | -1.120915000 | -1.276598000 |                                          |              |              |              |
| 6                                            | -3.903417000 | -0.915320000 | 1.261389000  |                                          |              |              |              |
| 1                                            | -4.986838000 | -1.121759000 | 1.276365000  |                                          |              |              |              |
| 1                                            | -3.379233000 | -1.882793000 | 1.300125000  |                                          |              |              |              |
| 1                                            | -3.648541000 | -0.359503000 | 2.178061000  |                                          |              |              |              |
| 1                                            | 5.903000000  | -0.787041000 | 0.000107000  |                                          |              |              |              |



|                                                         |              |              |              |                                                                         |              |              |              |
|---------------------------------------------------------|--------------|--------------|--------------|-------------------------------------------------------------------------|--------------|--------------|--------------|
| D4-OCH <sub>3</sub><br>E(RB3LYP) = -632.032131995 a. u. |              |              |              | D4-OC <sub>2</sub> H <sub>5</sub><br>E(RB3LYP) = -671.352181336a. u.    |              |              |              |
| 6                                                       | 3.107455000  | -1.444362000 | 0.000004000  | 6                                                                       | 3.512989000  | -1.512856000 | -0.000008000 |
| 6                                                       | 1.818181000  | -0.903284000 | 0.000004000  | 6                                                                       | 2.242488000  | -0.929069000 | -0.000006000 |
| 6                                                       | 1.589916000  | 0.501899000  | -0.000042000 | 6                                                                       | 2.061276000  | 0.483012000  | -0.000055000 |
| 6                                                       | 2.690646000  | 1.370982000  | -0.000090000 | 6                                                                       | 3.190459000  | 1.314775000  | -0.000105000 |
| 6                                                       | 3.979840000  | 0.837263000  | -0.000090000 | 6                                                                       | 4.461168000  | 0.738309000  | -0.000107000 |
| 6                                                       | 4.184116000  | -0.555304000 | -0.000044000 | 6                                                                       | 4.618802000  | -0.660279000 | -0.000059000 |
| 7                                                       | 0.586934000  | -1.546250000 | 0.000046000  | 7                                                                       | 0.990500000  | -1.530500000 | 0.000038000  |
| 6                                                       | 0.150673000  | 0.687653000  | -0.000027000 | 6                                                                       | 0.629027000  | 0.716670000  | -0.000037000 |
| 1                                                       | 3.269163000  | -2.524872000 | 0.000040000  | 1                                                                       | 3.638501000  | -2.598175000 | 0.000029000  |
| 1                                                       | 2.540885000  | 2.453200000  | -0.000126000 | 1                                                                       | 3.076936000  | 2.401400000  | -0.000143000 |
| 1                                                       | 4.842739000  | 1.506477000  | -0.000127000 | 1                                                                       | 5.345932000  | 1.378349000  | -0.000147000 |
| 6                                                       | -1.818014000 | -0.814203000 | 0.000057000  | 6                                                                       | -1.388683000 | -0.719111000 | 0.000052000  |
| 6                                                       | -2.634732000 | 0.321840000  | 0.000029000  | 6                                                                       | -2.168416000 | 0.443133000  | 0.000024000  |
| 6                                                       | -0.430845000 | -0.606926000 | 0.000028000  | 6                                                                       | 0.004512000  | -0.557672000 | 0.000021000  |
| 6                                                       | -2.075523000 | 1.622456000  | -0.000025000 | 6                                                                       | -1.565037000 | 1.724201000  | -0.000033000 |
| 1                                                       | -2.762925000 | 2.469329000  | -0.000045000 | 1                                                                       | -2.223715000 | 2.593623000  | -0.000053000 |
| 6                                                       | -0.699947000 | 1.805799000  | -0.000053000 | 6                                                                       | -0.184200000 | 1.862252000  | -0.000064000 |
| 1                                                       | -0.286548000 | 2.816886000  | -0.000096000 | 1                                                                       | 0.262230000  | 2.859218000  | -0.000107000 |
| 1                                                       | -2.229556000 | -1.822904000 | 0.000099000  | 1                                                                       | -1.832657000 | -1.713855000 | 0.000096000  |
| 1                                                       | 0.455154000  | -2.547507000 | 0.000084000  | 1                                                                       | 0.825292000  | -2.526779000 | 0.000078000  |
| 8                                                       | -4.000220000 | 0.284476000  | 0.000051000  | 8                                                                       | -3.533428000 | 0.451118000  | 0.000048000  |
| 6                                                       | -4.638303000 | -0.980166000 | 0.000105000  | 6                                                                       | -4.231127000 | -0.792110000 | 0.000104000  |
| 1                                                       | -4.380948000 | -1.568975000 | -0.899200000 | 1                                                                       | -3.950108000 | -1.381373000 | 0.893614000  |
| 1                                                       | -4.380922000 | -1.568912000 | 0.899443000  | 1                                                                       | -3.950138000 | -1.381436000 | -0.893375000 |
| 1                                                       | -5.717243000 | -0.776591000 | 0.000113000  | 6                                                                       | -5.716511000 | -0.482115000 | 0.000118000  |
| 1                                                       | 5.202642000  | -0.950065000 | -0.000045000 | 1                                                                       | -5.991006000 | 0.101739000  | -0.891966000 |
|                                                         |              |              |              | 1                                                                       | -5.990975000 | 0.101802000  | 0.892170000  |
|                                                         |              |              |              | 1                                                                       | -6.300398000 | -1.415915000 | 0.000160000  |
|                                                         |              |              |              | 1                                                                       | 5.623568000  | -1.088879000 | -0.000062000 |
| D4-NH <sub>2</sub><br>E(RB3LYP) = -572.863738451 a. u.  |              |              |              | D4-N(CH <sub>3</sub> ) <sub>2</sub><br>E(RB3LYP) = -651.473709094 a. u. |              |              |              |
| 6                                                       | 2.847470000  | -1.290184000 | 0.001626000  | 6                                                                       | 3.551241000  | -1.342258000 | 0.019759000  |
| 6                                                       | 1.515813000  | -0.865972000 | -0.000014000 | 6                                                                       | 2.235894000  | -0.870513000 | 0.001448000  |
| 6                                                       | 1.164274000  | 0.513765000  | 0.000468000  | 6                                                                       | 1.934369000  | 0.521522000  | -0.002683000 |
| 6                                                       | 2.183647000  | 1.476303000  | 0.003179000  | 6                                                                       | 2.987990000  | 1.446345000  | 0.012606000  |
| 6                                                       | 3.515839000  | 1.058983000  | 0.005010000  | 6                                                                       | 4.304229000  | 0.981097000  | 0.031174000  |

|                                                           |              |              |              |                                                           |              |              |              |
|-----------------------------------------------------------|--------------|--------------|--------------|-----------------------------------------------------------|--------------|--------------|--------------|
| 6                                                         | 3.842539000  | -0.309393000 | 0.004100000  | 6                                                         | 4.581246000  | -0.398076000 | 0.034621000  |
| 7                                                         | 0.346093000  | -1.615975000 | -0.001675000 | 7                                                         | 1.040123000  | -1.577437000 | -0.015246000 |
| 6                                                         | -0.286166000 | 0.571565000  | -0.002856000 | 6                                                         | 0.487560000  | 0.629974000  | -0.023508000 |
| 1                                                         | 3.104192000  | -2.352226000 | 0.000886000  | 1                                                         | 3.769525000  | -2.412916000 | 0.022575000  |
| 1                                                         | 1.938675000  | 2.541076000  | 0.003338000  | 1                                                         | 2.781712000  | 2.519314000  | 0.009731000  |
| 1                                                         | 4.315899000  | 1.802292000  | 0.006888000  | 1                                                         | 5.130566000  | 1.695063000  | 0.043091000  |
| 6                                                         | -2.112502000 | -1.094098000 | -0.004341000 | 6                                                         | -1.395688000 | -0.975393000 | -0.045303000 |
| 6                                                         | -3.043715000 | -0.043313000 | -0.005993000 | 6                                                         | -2.308318000 | 0.103009000  | -0.066932000 |
| 6                                                         | -0.752566000 | -0.771918000 | -0.004785000 | 6                                                         | -0.027939000 | -0.693293000 | -0.031687000 |
| 6                                                         | -2.589884000 | 1.300941000  | -0.005093000 | 6                                                         | -1.794922000 | 1.434411000  | -0.045422000 |
| 1                                                         | -3.328620000 | 2.106425000  | -0.011343000 | 1                                                         | -2.480432000 | 2.279366000  | -0.044176000 |
| 6                                                         | -1.233119000 | 1.605538000  | -0.002920000 | 6                                                         | -0.428522000 | 1.689880000  | -0.028238000 |
| 1                                                         | -0.912837000 | 2.650087000  | 0.000491000  | 1                                                         | -0.078387000 | 2.724842000  | -0.013820000 |
| 1                                                         | -2.449283000 | -2.134125000 | -0.008409000 | 1                                                         | -1.735873000 | -2.009581000 | -0.042290000 |
| 1                                                         | 0.304094000  | -2.624918000 | -0.010002000 | 1                                                         | 0.961750000  | -2.584200000 | -0.019461000 |
| 7                                                         | -4.415200000 | -0.311767000 | -0.073774000 | 7                                                         | -3.680840000 | -0.125361000 | -0.115675000 |
| 1                                                         | -5.002389000 | 0.422807000  | 0.311279000  | 6                                                         | -4.600734000 | 0.975455000  | 0.105458000  |
| 1                                                         | -4.685288000 | -1.217463000 | 0.299477000  | 1                                                         | -4.469274000 | 1.766268000  | -0.651626000 |
| 1                                                         | 4.891758000  | -0.613070000 | 0.005260000  | 1                                                         | -5.630344000 | 0.604715000  | 0.015760000  |
|                                                           |              |              |              | 1                                                         | -4.488058000 | 1.443503000  | 1.104338000  |
|                                                           |              |              |              | 6                                                         | -4.179581000 | -1.474762000 | 0.062052000  |
|                                                           |              |              |              | 1                                                         | -5.273852000 | -1.470496000 | -0.026451000 |
|                                                           |              |              |              | 1                                                         | -3.788123000 | -2.150312000 | -0.717530000 |
|                                                           |              |              |              | 1                                                         | -3.913866000 | -1.910771000 | 1.047121000  |
|                                                           |              |              |              | 1                                                         | 5.618716000  | -0.739587000 | 0.049110000  |
| D4-PhCH <sub>3</sub><br>E (RB3LYP) = -787.892917043 a. u. |              |              |              | D4-PhNH <sub>2</sub><br>E (RB3LYP) = -803.935179188 a. u. |              |              |              |
| 6                                                         | -4.764384000 | -1.453146000 | -0.251722000 | 6                                                         | 4.757539000  | -1.450378000 | 0.251077000  |
| 6                                                         | -3.473073000 | -0.922363000 | -0.157998000 | 6                                                         | 3.465821000  | -0.920862000 | 0.157497000  |
| 6                                                         | -3.245664000 | 0.463924000  | 0.073962000  | 6                                                         | 3.237400000  | 0.465839000  | -0.072151000 |
| 6                                                         | -4.344887000 | 1.324253000  | 0.212642000  | 6                                                         | 4.335877000  | 1.327141000  | -0.208554000 |
| 6                                                         | -5.634001000 | 0.800657000  | 0.120120000  | 6                                                         | 5.625803000  | 0.804588000  | -0.116175000 |
| 6                                                         | -5.838421000 | -0.573643000 | -0.109651000 | 6                                                         | 5.831372000  | -0.569714000 | 0.111220000  |
| 7                                                         | -2.244969000 | -1.558739000 | -0.258867000 | 7                                                         | 2.238111000  | -1.558119000 | 0.256335000  |
| 6                                                         | -1.806861000 | 0.647203000  | 0.110139000  | 6                                                         | 1.798276000  | 0.647975000  | -0.109003000 |
| 1                                                         | -4.928208000 | -2.518394000 | -0.429867000 | 1                                                         | 4.922164000  | -2.515859000 | 0.427353000  |
| 1                                                         | -4.192716000 | 2.391251000  | 0.391047000  | 1                                                         | 4.182688000  | 2.394318000  | -0.385155000 |
| 1                                                         | -6.496680000 | 1.461419000  | 0.226611000  | 1                                                         | 6.487904000  | 1.466423000  | -0.220996000 |
| 6                                                         | 0.158853000  | -0.825013000 | -0.129348000 | 6                                                         | -0.166515000 | -0.826224000 | 0.129072000  |

|   |              |              |              |   |              |              |              |
|---|--------------|--------------|--------------|---|--------------|--------------|--------------|
| 6 | 0.998271000  | 0.285985000  | 0.051476000  | 6 | -1.009691000 | 0.282645000  | -0.052891000 |
| 6 | -1.224614000 | -0.633531000 | -0.097959000 | 6 | 1.216638000  | -0.633122000 | 0.096340000  |
| 6 | 0.420122000  | 1.564258000  | 0.260018000  | 6 | -0.430333000 | 1.561440000  | -0.260750000 |
| 1 | 1.077367000  | 2.418719000  | 0.429323000  | 1 | -1.087374000 | 2.415545000  | -0.432961000 |
| 6 | -0.958997000 | 1.749290000  | 0.290840000  | 6 | 0.948405000  | 1.748840000  | -0.288332000 |
| 1 | -1.373582000 | 2.745198000  | 0.463158000  | 1 | 1.361255000  | 2.745837000  | -0.459121000 |
| 1 | 0.581760000  | -1.813394000 | -0.320668000 | 1 | -0.586792000 | -1.815391000 | 0.322472000  |
| 1 | -2.113635000 | -2.546307000 | -0.424787000 | 1 | 2.107403000  | -2.546182000 | 0.419432000  |
| 6 | 4.693668000  | 0.931399000  | -0.597868000 | 6 | -4.708515000 | 0.944447000  | 0.573214000  |
| 6 | 5.311601000  | -0.191546000 | -0.031054000 | 6 | -5.322770000 | -0.197600000 | 0.025413000  |
| 6 | 4.483550000  | -1.156076000 | 0.566272000  | 6 | -4.493456000 | -1.178491000 | -0.550689000 |
| 6 | 3.306082000  | 1.088271000  | -0.571590000 | 6 | -3.324472000 | 1.094505000  | 0.542434000  |
| 6 | 3.098504000  | -1.003842000 | 0.595179000  | 6 | -3.110309000 | -1.018540000 | -0.574301000 |
| 6 | 2.475752000  | 0.123550000  | 0.025006000  | 6 | -2.485371000 | 0.119239000  | -0.029422000 |
| 1 | 5.308770000  | 1.697230000  | -1.078390000 | 1 | -5.327242000 | 1.719387000  | 1.034565000  |
| 1 | 2.487683000  | -1.760114000 | 1.093298000  | 1 | -2.500655000 | -1.788352000 | -1.052776000 |
| 1 | 4.933814000  | -2.039902000 | 1.027540000  | 1 | -4.944130000 | -2.068803000 | -0.998345000 |
| 1 | 2.858446000  | 1.964037000  | -1.046212000 | 1 | -2.881621000 | 1.981173000  | 1.001173000  |
| 6 | 6.811009000  | -0.365797000 | -0.053642000 | 7 | -6.713121000 | -0.322660000 | -0.005235000 |
| 1 | 7.223787000  | -0.420788000 | 0.968097000  | 1 | -7.201477000 | 0.202637000  | 0.714012000  |
| 1 | 7.099563000  | -1.298805000 | -0.566756000 | 1 | -7.051903000 | -1.279148000 | -0.051303000 |
| 1 | 7.306818000  | 0.469063000  | -0.570753000 | 1 | 6.850660000  | -0.956509000 | 0.179946000  |
| 1 | -6.857476000 | -0.961037000 | -0.178500000 |   |              |              |              |

**Table S7.** Cartesian coordinates (in Angstrom unit) of B3LYP/cc-pVDZ geometries of D5 based donor systems.

| D5<br>E(RB3LYP) = -994.310143043 a. u. |              |              |              | D5-CH <sub>3</sub><br>E(RB3LYP) = -1033.62761228 a. u. |              |              |              |
|----------------------------------------|--------------|--------------|--------------|--------------------------------------------------------|--------------|--------------|--------------|
| 6                                      | -2.401400000 | 1.085150000  | -0.112395000 | 6                                                      | -2.867230000 | 0.796336000  | -0.190252000 |
| 6                                      | -1.236025000 | 0.329759000  | 0.124991000  | 6                                                      | -1.616690000 | 0.218092000  | 0.106256000  |
| 7                                      | -0.000043000 | 0.946705000  | 0.431125000  | 7                                                      | -0.494168000 | 1.008274000  | 0.443843000  |
| 6                                      | -1.358187000 | -1.077639000 | 0.066228000  | 6                                                      | -1.536895000 | -1.193635000 | 0.074424000  |
| 16                                     | 0.000293000  | -2.123508000 | 0.555709000  | 16                                                     | -0.066454000 | -2.031016000 | 0.636373000  |
| 6                                      | 1.358544000  | -1.077337000 | 0.066219000  | 6                                                      | 1.152736000  | -0.811007000 | 0.184033000  |
| 6                                      | 1.236086000  | 0.330040000  | 0.124981000  | 6                                                      | 0.828945000  | 0.565056000  | 0.203073000  |
| 6                                      | -3.624678000 | 0.471472000  | -0.398825000 | 6                                                      | -3.979522000 | 0.010775000  | -0.507277000 |
| 6                                      | -2.572961000 | -1.683174000 | -0.263780000 | 6                                                      | -2.640705000 | -1.970381000 | -0.285787000 |
| 6                                      | 2.573456000  | -1.682623000 | -0.263740000 | 6                                                      | 2.452304000  | -1.244414000 | -0.078053000 |
| 6                                      | 2.401349000  | 1.085657000  | -0.112247000 | 6                                                      | 1.889289000  | 1.464635000  | -0.005678000 |
| 6                                      | 3.624764000  | 0.472227000  | -0.398623000 | 6                                                      | 3.197501000  | 1.018977000  | -0.224438000 |

|                                                                       |              |              |              |                                                  |              |              |              |
|-----------------------------------------------------------------------|--------------|--------------|--------------|--------------------------------------------------|--------------|--------------|--------------|
| 6                                                                     | 3.718995000  | -0.914761000 | -0.488571000 | 6                                                | 3.508081000  | -0.341080000 | -0.277424000 |
| 1                                                                     | 2.618750000  | -2.772597000 | -0.316663000 | 1                                                | 2.645992000  | -2.320258000 | -0.100075000 |
| 1                                                                     | 2.367205000  | 2.171975000  | -0.075952000 | 1                                                | 1.709654000  | 2.537322000  | -0.000698000 |
| 1                                                                     | 4.503871000  | 1.098389000  | -0.565108000 | 1                                                | 3.985884000  | 1.761608000  | -0.370867000 |
| 1                                                                     | 4.667487000  | -1.399301000 | -0.726814000 | 6                                                | -3.873568000 | -1.377009000 | -0.569514000 |
| 6                                                                     | -3.718639000 | -0.915541000 | -0.488697000 | 1                                                | -2.987971000 | 1.877054000  | -0.177373000 |
| 1                                                                     | -2.367436000 | 2.171483000  | -0.076214000 | 1                                                | -4.930957000 | 0.502969000  | -0.720007000 |
| 1                                                                     | -4.503888000 | 1.097459000  | -0.565427000 | 1                                                | -2.529823000 | -3.056578000 | -0.315836000 |
| 1                                                                     | -2.618034000 | -2.773158000 | -0.316694000 | 6                                                | -0.706225000 | 2.413623000  | 0.803394000  |
| 6                                                                     | -0.000267000 | 2.358651000  | 0.827762000  | 1                                                | -1.624418000 | 2.458152000  | 1.408717000  |
| 1                                                                     | -0.878885000 | 2.512605000  | 1.472565000  | 1                                                | 0.115361000  | 2.701847000  | 1.476762000  |
| 1                                                                     | 0.878806000  | 2.513166000  | 1.471819000  | 6                                                | -0.801854000 | 3.421048000  | -0.353905000 |
| 6                                                                     | -0.001188000 | 3.400229000  | -0.302766000 | 1                                                | -1.637458000 | 3.197043000  | -1.032603000 |
| 1                                                                     | -0.885541000 | 3.311740000  | -0.950055000 | 1                                                | 0.112596000  | 3.441653000  | -0.964067000 |
| 1                                                                     | 0.882527000  | 3.312342000  | -0.950996000 | 1                                                | -0.959351000 | 4.433076000  | 0.054712000  |
| 1                                                                     | -0.001302000 | 4.412700000  | 0.134094000  | 6                                                | 4.911166000  | -0.835535000 | -0.531886000 |
| 1                                                                     | -4.667020000 | -1.400272000 | -0.726991000 | 1                                                | 5.288684000  | -1.433452000 | 0.315198000  |
|                                                                       |              |              |              | 1                                                | 4.955585000  | -1.480654000 | -1.425675000 |
|                                                                       |              |              |              | 1                                                | 5.608651000  | 0.000947000  | -0.687447000 |
|                                                                       |              |              |              | 1                                                | -4.733985000 | -1.995266000 | -0.831410000 |
| D5-C <sub>5</sub> H <sub>11</sub><br>E(RB3LYP) = -1190.88380677 a. u. |              |              |              | D5-isopropyl<br>E(RB3LYP) = -1112.25529707 a. u. |              |              |              |
| 6                                                                     | 4.469774000  | 0.802255000  | 0.391129000  | 6                                                | 3.525296000  | 0.723361000  | 0.263882000  |
| 6                                                                     | 3.254048000  | 0.220522000  | -0.021133000 | 6                                                | 2.270682000  | 0.187591000  | -0.089264000 |
| 7                                                                     | 2.167036000  | 1.007613000  | -0.464771000 | 7                                                | 1.188521000  | 1.016021000  | -0.465717000 |
| 6                                                                     | 3.174853000  | -1.191480000 | 0.005887000  | 6                                                | 2.144724000  | -1.221058000 | -0.072918000 |
| 16                                                                    | 1.766559000  | -2.034319000 | -0.690818000 | 16                                               | 0.673141000  | -2.006863000 | -0.703286000 |
| 6                                                                     | 0.506907000  | -0.815984000 | -0.360885000 | 6                                                | -0.523329000 | -0.750505000 | -0.291036000 |
| 6                                                                     | 0.827993000  | 0.561107000  | -0.351626000 | 6                                                | -0.156079000 | 0.611773000  | -0.283716000 |
| 6                                                                     | 5.548902000  | 0.020120000  | 0.813590000  | 6                                                | 4.597914000  | -0.099697000 | 0.620348000  |
| 6                                                                     | 4.241574000  | -1.964654000 | 0.470528000  | 6                                                | 3.207105000  | -2.035219000 | 0.326880000  |
| 6                                                                     | -0.810392000 | -1.249861000 | -0.224769000 | 6                                                | -1.848475000 | -1.143293000 | -0.085318000 |
| 6                                                                     | -0.250457000 | 1.455616000  | -0.248268000 | 6                                                | -1.197007000 | 1.544198000  | -0.108311000 |
| 6                                                                     | -1.574744000 | 1.009066000  | -0.155634000 | 6                                                | -2.524494000 | 1.140876000  | 0.052903000  |
| 6                                                                     | -1.886766000 | -0.351564000 | -0.129732000 | 6                                                | -2.882283000 | -0.212173000 | 0.080422000  |
| 1                                                                     | -1.003446000 | -2.326308000 | -0.219590000 | 1                                                | -2.077273000 | -2.212366000 | -0.080699000 |
| 1                                                                     | -0.074983000 | 2.529016000  | -0.238344000 | 1                                                | -0.982073000 | 2.610409000  | -0.096505000 |
| 1                                                                     | -2.363863000 | 1.758939000  | -0.088926000 | 1                                                | -3.286954000 | 1.913822000  | 0.173725000  |
| 6                                                                     | 5.440716000  | -1.367802000 | 0.868432000  | 6                                                | 4.445288000  | -1.483686000 | 0.666695000  |

|                                                |              |              |              |                                           |              |              |              |
|------------------------------------------------|--------------|--------------|--------------|-------------------------------------------|--------------|--------------|--------------|
| 1                                              | 4.588717000  | 1.883243000  | 0.387480000  | 1                                         | 3.680667000  | 1.799731000  | 0.264932000  |
| 1                                              | 6.474778000  | 0.515116000  | 1.114396000  | 1                                         | 5.554821000  | 0.360187000  | 0.876403000  |
| 1                                              | 4.130806000  | -3.051069000 | 0.492304000  | 1                                         | 3.060650000  | -3.117483000 | 0.343195000  |
| 6                                              | 2.408222000  | 2.414159000  | -0.800127000 | 6                                         | 1.459294000  | 2.416534000  | -0.804218000 |
| 1                                              | 3.379920000  | 2.462915000  | -1.314780000 | 1                                         | 2.402355000  | 2.436145000  | -1.371446000 |
| 1                                              | 1.653748000  | 2.701355000  | -1.548263000 | 1                                         | 0.675559000  | 2.736000000  | -1.507917000 |
| 6                                              | 2.388961000  | 3.418654000  | 0.363455000  | 6                                         | 1.539528000  | 3.411879000  | 0.364636000  |
| 1                                              | 3.157725000  | 3.196368000  | 1.117546000  | 1                                         | 2.338765000  | 3.155947000  | 1.075079000  |
| 1                                              | 1.420599000  | 3.432339000  | 0.884038000  | 1                                         | 0.601788000  | 3.457668000  | 0.936945000  |
| 1                                              | 2.579174000  | 4.432778000  | -0.025584000 | 1                                         | 1.746146000  | 4.421229000  | -0.028427000 |
| 6                                              | -3.299656000 | -0.895209000 | -0.009464000 | 6                                         | -4.321691000 | -0.668743000 | 0.277566000  |
| 1                                              | -3.343829000 | -1.559616000 | 0.873724000  | 1                                         | -4.311318000 | -1.772753000 | 0.257404000  |
| 1                                              | -3.495859000 | -1.554537000 | -0.875682000 | 6                                         | -5.236413000 | -0.195062000 | -0.866020000 |
| 6                                              | -4.426425000 | 0.136019000  | 0.091333000  | 6                                         | -4.878295000 | -0.238053000 | 1.646394000  |
| 1                                              | -4.254041000 | 0.790684000  | 0.965053000  | 1                                         | -4.246288000 | -0.607806000 | 2.469218000  |
| 1                                              | -4.407431000 | 0.795526000  | -0.795457000 | 1                                         | -4.928988000 | 0.860652000  | 1.730774000  |
| 6                                              | -5.812604000 | -0.506542000 | 0.210177000  | 1                                         | -5.898431000 | -0.629999000 | 1.794111000  |
| 1                                              | -5.834252000 | -1.169250000 | 1.096061000  | 1                                         | -5.303160000 | 0.905610000  | -0.896191000 |
| 1                                              | -5.987332000 | -1.164293000 | -0.662346000 | 1                                         | -6.259183000 | -0.586413000 | -0.735864000 |
| 6                                              | -6.954100000 | 0.510591000  | 0.312411000  | 1                                         | -4.861476000 | -0.534172000 | -1.844636000 |
| 1                                              | -6.778510000 | 1.167286000  | 1.184577000  | 1                                         | 5.273894000  | -2.131093000 | 0.958972000  |
| 1                                              | -6.931532000 | 1.172283000  | -0.573272000 |                                           |              |              |              |
| 6                                              | -8.335022000 | -0.138282000 | 0.430764000  |                                           |              |              |              |
| 1                                              | -8.401003000 | -0.778475000 | 1.327118000  |                                           |              |              |              |
| 1                                              | -8.555092000 | -0.773625000 | -0.444202000 |                                           |              |              |              |
| 1                                              | -9.133041000 | 0.618227000  | 0.502249000  |                                           |              |              |              |
| 1                                              | 6.273840000  | -1.983475000 | 1.211968000  |                                           |              |              |              |
| D5-t-butyl<br>E(RB3LYP) = -1151.56629947 a. u. |              |              |              | D5-OH<br>E(RB3LYP) = -1069.53458714 a. u. |              |              |              |
| 6                                              | 3.811541000  | 0.565618000  | 0.278361000  | 6                                         | -2.841958000 | 0.829327000  | -0.182294000 |
| 6                                              | 2.521976000  | 0.129566000  | -0.086187000 | 6                                         | -1.596817000 | 0.234737000  | 0.106279000  |
| 7                                              | 1.507290000  | 1.041353000  | -0.457510000 | 7                                         | -0.463746000 | 1.005496000  | 0.443684000  |
| 6                                              | 2.290482000  | -1.265783000 | -0.086592000 | 6                                         | -1.535693000 | -1.178105000 | 0.070152000  |
| 16                                             | 0.767048000  | -1.932193000 | -0.730196000 | 16                                        | -0.077037000 | -2.038515000 | 0.630827000  |
| 6                                              | -0.335012000 | -0.593919000 | -0.310443000 | 6                                         | 1.160118000  | -0.838191000 | 0.180724000  |
| 6                                              | 0.135471000  | 0.738174000  | -0.288441000 | 6                                         | 0.854593000  | 0.542093000  | 0.191113000  |
| 6                                              | 4.817735000  | -0.339543000 | 0.629101000  | 6                                         | -3.964644000 | 0.058377000  | -0.498190000 |
| 6                                              | 3.287425000  | -2.161823000 | 0.306854000  | 6                                         | -2.649589000 | -1.940127000 | -0.289834000 |
| 6                                              | -1.683823000 | -0.888471000 | -0.117718000 | 6                                         | 2.449807000  | -1.299432000 | -0.081010000 |

|                                                         |              |              |              |                                                                       |              |              |              |
|---------------------------------------------------------|--------------|--------------|--------------|-----------------------------------------------------------------------|--------------|--------------|--------------|
| 6                                                       | -0.835377000 | 1.738172000  | -0.113321000 | 6                                                                     | 1.923459000  | 1.425807000  | -0.033638000 |
| 6                                                       | -2.193503000 | 1.432244000  | 0.035852000  | 6                                                                     | 3.228478000  | 0.970393000  | -0.253146000 |
| 6                                                       | -2.656996000 | 0.113409000  | 0.050515000  | 6                                                                     | 3.499840000  | -0.397240000 | -0.288179000 |
| 1                                                       | -1.975071000 | -1.940790000 | -0.127223000 | 1                                                                     | 2.657966000  | -2.370292000 | -0.100510000 |
| 1                                                       | -0.547041000 | 2.786744000  | -0.089841000 | 1                                                                     | 1.757217000  | 2.500518000  | -0.038137000 |
| 1                                                       | -2.885799000 | 2.264943000  | 0.156423000  | 1                                                                     | 4.029656000  | 1.698052000  | -0.410888000 |
| 6                                                       | 4.561799000  | -1.708733000 | 0.657836000  | 6                                                                     | -3.875955000 | -1.330407000 | -0.567606000 |
| 1                                                       | 4.047125000  | 1.627230000  | 0.293305000  | 1                                                                     | -2.949189000 | 1.911485000  | -0.164010000 |
| 1                                                       | 5.805048000  | 0.044368000  | 0.894721000  | 1                                                                     | -4.910965000 | 0.562853000  | -0.705108000 |
| 1                                                       | 3.060227000  | -3.230185000 | 0.309879000  | 1                                                                     | -2.552489000 | -3.027555000 | -0.323730000 |
| 6                                                       | 1.883653000  | 2.422806000  | -0.772443000 | 6                                                                     | -0.651127000 | 2.409326000  | 0.817641000  |
| 1                                                       | 2.830074000  | 2.381340000  | -1.332732000 | 1                                                                     | -1.564021000 | 2.463123000  | 1.430625000  |
| 1                                                       | 1.131139000  | 2.809729000  | -1.476292000 | 1                                                                     | 0.180498000  | 2.678678000  | 1.487048000  |
| 6                                                       | 2.026796000  | 3.390684000  | 0.413171000  | 6                                                                     | -0.741639000 | 3.431277000  | -0.327924000 |
| 1                                                       | 2.799121000  | 3.065044000  | 1.124879000  | 1                                                                     | -1.586013000 | 3.226706000  | -1.001883000 |
| 1                                                       | 1.089873000  | 3.495518000  | 0.978984000  | 1                                                                     | 0.167271000  | 3.446568000  | -0.946650000 |
| 1                                                       | 2.310101000  | 4.388412000  | 0.038697000  | 1                                                                     | -0.881410000 | 4.440867000  | 0.093088000  |
| 6                                                       | -4.136735000 | -0.268294000 | 0.234053000  | 8                                                                     | 4.744492000  | -0.917203000 | -0.513904000 |
| 6                                                       | -4.288396000 | -1.155603000 | 1.491326000  | 1                                                                     | 5.365739000  | -0.185758000 | -0.642386000 |
| 1                                                       | -3.697974000 | -2.081697000 | 1.413454000  | 1                                                                     | -4.744613000 | -1.936859000 | -0.829775000 |
| 1                                                       | -3.953817000 | -0.620198000 | 2.394438000  |                                                                       |              |              |              |
| 1                                                       | -5.343427000 | -1.443444000 | 1.634821000  |                                                                       |              |              |              |
| 6                                                       | -5.035012000 | 0.969743000  | 0.407383000  |                                                                       |              |              |              |
| 1                                                       | -4.754139000 | 1.559637000  | 1.294280000  |                                                                       |              |              |              |
| 1                                                       | -4.995748000 | 1.632070000  | -0.471950000 |                                                                       |              |              |              |
| 1                                                       | -6.082419000 | 0.654273000  | 0.537544000  |                                                                       |              |              |              |
| 6                                                       | -4.626764000 | -1.050980000 | -1.006376000 |                                                                       |              |              |              |
| 1                                                       | -5.685562000 | -1.336545000 | -0.888293000 |                                                                       |              |              |              |
| 1                                                       | -4.536966000 | -0.440048000 | -1.919046000 |                                                                       |              |              |              |
| 1                                                       | -4.048304000 | -1.974573000 | -1.163395000 |                                                                       |              |              |              |
| 1                                                       | 5.338199000  | -2.419793000 | 0.945468000  |                                                                       |              |              |              |
| D5-OCH <sub>3</sub><br>E(RB3LYP) = -1108.83620931 a. u. |              |              |              | D5-OC <sub>2</sub> H <sub>5</sub><br>E(RB3LYP) = -1148.15629098 a. u. |              |              |              |
| 6                                                       | -3.190244000 | 0.825154000  | -0.236408000 | 6                                                                     | -3.607917000 | 0.699869000  | -0.299460000 |
| 6                                                       | -1.953356000 | 0.232479000  | 0.089622000  | 6                                                                     | -2.351558000 | 0.174574000  | 0.065476000  |
| 7                                                       | -0.832777000 | 1.005852000  | 0.461422000  | 7                                                                     | -1.281680000 | 1.007975000  | 0.455891000  |
| 6                                                       | -1.888949000 | -1.180373000 | 0.054475000  | 6                                                                     | -2.215002000 | -1.233561000 | 0.049953000  |
| 16                                                      | -0.446790000 | -2.039583000 | 0.657065000  | 16                                                                    | -0.747782000 | -2.011554000 | 0.700531000  |
| 6                                                       | 0.801502000  | -0.835704000 | 0.248061000  | 6                                                                     | 0.448701000  | -0.750530000 | 0.308719000  |

|                                                        |              |              |              |                                                                         |              |              |              |
|--------------------------------------------------------|--------------|--------------|--------------|-------------------------------------------------------------------------|--------------|--------------|--------------|
| 6                                                      | 0.493722000  | 0.545701000  | 0.252434000  | 6                                                                       | 0.071530000  | 0.613142000  | 0.287075000  |
| 6                                                      | -4.301769000 | 0.052846000  | -0.586369000 | 6                                                                       | -4.669521000 | -0.131825000 | -0.667804000 |
| 6                                                      | -2.990724000 | -1.943667000 | -0.338910000 | 6                                                                       | -3.266210000 | -2.056190000 | -0.361761000 |
| 6                                                      | 2.098275000  | -1.289659000 | 0.027820000  | 6                                                                       | 1.772210000  | -1.140348000 | 0.127958000  |
| 6                                                      | 1.568303000  | 1.428282000  | 0.067027000  | 6                                                                       | 1.104894000  | 1.546638000  | 0.117484000  |
| 6                                                      | 2.885619000  | 0.981471000  | -0.111762000 | 6                                                                       | 2.447284000  | 1.165421000  | -0.021608000 |
| 6                                                      | 3.158950000  | -0.386827000 | -0.142862000 | 6                                                                       | 2.791148000  | -0.187737000 | -0.027547000 |
| 1                                                      | 2.312835000  | -2.359397000 | 0.012352000  | 1                                                                       | 2.040394000  | -2.198031000 | 0.132072000  |
| 1                                                      | 1.400632000  | 2.502867000  | 0.060520000  | 1                                                                       | 0.883525000  | 2.611206000  | 0.092490000  |
| 1                                                      | 3.674291000  | 1.722044000  | -0.237596000 | 1                                                                       | 3.199947000  | 1.944028000  | -0.137040000 |
| 6                                                      | -4.209081000 | -1.335815000 | -0.653254000 | 6                                                                       | -4.505117000 | -1.514666000 | -0.714766000 |
| 1                                                      | -3.299638000 | 1.907127000  | -0.221263000 | 1                                                                       | -3.772088000 | 1.775003000  | -0.300833000 |
| 1                                                      | -5.242035000 | 0.556142000  | -0.821817000 | 1                                                                       | -5.627538000 | 0.320349000  | -0.933507000 |
| 1                                                      | -2.890943000 | -3.030934000 | -0.370444000 | 1                                                                       | -3.110887000 | -3.137281000 | -0.376917000 |
| 6                                                      | -1.034870000 | 2.410648000  | 0.824408000  | 6                                                                       | -1.563682000 | 2.404773000  | 0.795495000  |
| 1                                                      | -1.967379000 | 2.464967000  | 1.406967000  | 1                                                                       | -2.512732000 | 2.418578000  | 1.353200000  |
| 1                                                      | -0.225974000 | 2.683714000  | 1.519529000  | 1                                                                       | -0.787992000 | 2.726461000  | 1.507466000  |
| 6                                                      | -1.088911000 | 3.427515000  | -0.327827000 | 6                                                                       | -1.638512000 | 3.404312000  | -0.370651000 |
| 1                                                      | -1.911066000 | 3.219340000  | -1.027692000 | 1                                                                       | -2.430542000 | 3.146875000  | -1.088642000 |
| 1                                                      | -0.160284000 | 3.439985000  | -0.916549000 | 1                                                                       | -0.696549000 | 3.456890000  | -0.935483000 |
| 1                                                      | -1.242529000 | 4.438940000  | 0.083858000  | 1                                                                       | -1.853465000 | 4.411354000  | 0.023993000  |
| 8                                                      | 4.392193000  | -0.946297000 | -0.325907000 | 8                                                                       | 4.054567000  | -0.685620000 | -0.171411000 |
| 6                                                      | 5.495090000  | -0.074584000 | -0.503769000 | 6                                                                       | 5.132711000  | 0.233282000  | -0.335959000 |
| 1                                                      | 5.376235000  | 0.558917000  | -1.401689000 | 1                                                                       | 5.187416000  | 0.910296000  | 0.537703000  |
| 1                                                      | 5.648859000  | 0.576857000  | 0.375848000  | 1                                                                       | 4.962153000  | 0.857022000  | -1.233974000 |
| 1                                                      | 6.374699000  | -0.719131000 | -0.632170000 | 6                                                                       | 6.407154000  | -0.578490000 | -0.473568000 |
| 1                                                      | -5.068512000 | -1.943486000 | -0.941722000 | 1                                                                       | 6.348559000  | -1.247870000 | -1.345712000 |
|                                                        |              |              |              | 1                                                                       | 6.573431000  | -1.194827000 | 0.423450000  |
|                                                        |              |              |              | 1                                                                       | 7.272361000  | 0.090403000  | -0.603568000 |
|                                                        |              |              |              | 1                                                                       | -5.324933000 | -2.168448000 | -1.017359000 |
| D5-NH <sub>2</sub><br>E(RB3LYP) = -1049.66783900 a. u. |              |              |              | D5-N(CH <sub>3</sub> ) <sub>2</sub><br>E(RB3LYP) = -1128.27832266 a. u. |              |              |              |
| 6                                                      | -2.857336000 | 0.808035000  | -0.188140000 | 6                                                                       | -3.548969000 | 0.619555000  | -0.237549000 |
| 6                                                      | -1.606021000 | 0.227200000  | 0.103992000  | 6                                                                       | -2.259236000 | 0.152899000  | 0.090458000  |
| 7                                                      | -0.482955000 | 1.008347000  | 0.443729000  | 7                                                                       | -1.219136000 | 1.031377000  | 0.454010000  |
| 6                                                      | -1.530431000 | -1.185751000 | 0.068856000  | 6                                                                       | -2.057743000 | -1.248115000 | 0.065756000  |
| 16                                                     | -0.067038000 | -2.030116000 | 0.642515000  | 16                                                                      | -0.540166000 | -1.956733000 | 0.680731000  |
| 6                                                      | 1.162021000  | -0.819207000 | 0.194716000  | 6                                                                       | 0.588249000  | -0.642958000 | 0.252379000  |
| 6                                                      | 0.842091000  | 0.554689000  | 0.197834000  | 6                                                                       | 0.146253000  | 0.694955000  | 0.245297000  |

|                                                          |              |              |              |                                                          |              |              |              |
|----------------------------------------------------------|--------------|--------------|--------------|----------------------------------------------------------|--------------|--------------|--------------|
| 6                                                        | -3.970508000 | 0.025168000  | -0.508151000 | 6                                                        | -4.579862000 | -0.260063000 | -0.580979000 |
| 6                                                        | -2.634906000 | -1.959097000 | -0.295749000 | 6                                                        | -3.079867000 | -2.117436000 | -0.322154000 |
| 6                                                        | 2.457267000  | -1.269199000 | -0.064235000 | 6                                                        | 1.922942000  | -0.982903000 | 0.031962000  |
| 6                                                        | 1.906025000  | 1.444238000  | -0.033690000 | 6                                                        | 1.139069000  | 1.669273000  | 0.050382000  |
| 6                                                        | 3.212405000  | 0.999915000  | -0.250405000 | 6                                                        | 2.485085000  | 1.343477000  | -0.128884000 |
| 6                                                        | 3.514237000  | -0.368392000 | -0.279607000 | 6                                                        | 2.915703000  | 0.002126000  | -0.170374000 |
| 1                                                        | 2.649239000  | -2.345244000 | -0.069704000 | 1                                                        | 2.180803000  | -2.040581000 | 0.039674000  |
| 1                                                        | 1.730390000  | 2.517759000  | -0.046624000 | 1                                                        | 0.877659000  | 2.725461000  | 0.044799000  |
| 1                                                        | 4.004444000  | 1.736030000  | -0.409707000 | 1                                                        | 3.193226000  | 2.160605000  | -0.253942000 |
| 6                                                        | -3.866836000 | -1.362614000 | -0.578382000 | 6                                                        | -4.352022000 | -1.633491000 | -0.639631000 |
| 1                                                        | -2.976194000 | 1.889021000  | -0.169459000 | 1                                                        | -3.763131000 | 1.685964000  | -0.229270000 |
| 1                                                        | -4.921583000 | 0.519613000  | -0.717814000 | 1                                                        | -5.565066000 | 0.147366000  | -0.818420000 |
| 1                                                        | -2.526435000 | -3.045557000 | -0.328231000 | 1                                                        | -2.874673000 | -3.190063000 | -0.345782000 |
| 6                                                        | -0.682973000 | 2.410673000  | 0.814792000  | 6                                                        | -1.550833000 | 2.413828000  | 0.803734000  |
| 1                                                        | -1.596998000 | 2.458621000  | 1.426908000  | 1                                                        | -2.484615000 | 2.388066000  | 1.386517000  |
| 1                                                        | 0.146101000  | 2.688630000  | 1.483797000  | 1                                                        | -0.770761000 | 2.768314000  | 1.495105000  |
| 6                                                        | -0.781032000 | 3.429762000  | -0.332877000 | 6                                                        | -1.698382000 | 3.409222000  | -0.359085000 |
| 1                                                        | -1.622853000 | 3.216666000  | -1.007491000 | 1                                                        | -2.497065000 | 3.117535000  | -1.056416000 |
| 1                                                        | 0.128773000  | 3.451260000  | -0.950072000 | 1                                                        | -0.773981000 | 3.500721000  | -0.947526000 |
| 1                                                        | -0.929907000 | 4.439071000  | 0.085854000  | 1                                                        | -1.945644000 | 4.406683000  | 0.041163000  |
| 7                                                        | 4.828400000  | -0.827181000 | -0.446237000 | 7                                                        | 4.246754000  | -0.341949000 | -0.409138000 |
| 1                                                        | 5.422911000  | -0.186172000 | -0.965040000 | 6                                                        | 4.672550000  | -1.707256000 | -0.162416000 |
| 1                                                        | 4.890632000  | -1.760321000 | -0.844872000 | 1                                                        | 4.547439000  | -2.022693000 | 0.894415000  |
| 1                                                        | -4.728041000 | -1.978205000 | -0.843962000 | 1                                                        | 4.112298000  | -2.416962000 | -0.792644000 |
|                                                          |              |              |              | 1                                                        | 5.734175000  | -1.804780000 | -0.426293000 |
|                                                          |              |              |              | 6                                                        | 5.257457000  | 0.696006000  | -0.330358000 |
|                                                          |              |              |              | 1                                                        | 5.321257000  | 1.172139000  | 0.670411000  |
|                                                          |              |              |              | 1                                                        | 6.237784000  | 0.261115000  | -0.567073000 |
|                                                          |              |              |              | 1                                                        | 5.065435000  | 1.492130000  | -1.068207000 |
|                                                          |              |              |              | 1                                                        | -5.148177000 | -2.324000000 | -0.923533000 |
| D5-PhCH <sub>3</sub><br>E(RB3LYP) = -1264.69880091 a. u. |              |              |              | D5-PhNH <sub>2</sub><br>E(RB3LYP) = -1280.74102337 a. u. |              |              |              |
| 6                                                        | 4.682755000  | 0.337932000  | 0.414561000  | 6                                                        | 4.676904000  | 0.343843000  | 0.413164000  |
| 6                                                        | 3.384112000  | 0.023244000  | -0.032222000 | 6                                                        | 3.377869000  | 0.027631000  | -0.032157000 |
| 7                                                        | 2.445234000  | 1.031881000  | -0.353248000 | 7                                                        | 2.438165000  | 1.033774000  | -0.354337000 |
| 6                                                        | 3.063200000  | -1.347275000 | -0.166830000 | 6                                                        | 3.058399000  | -1.343761000 | -0.165245000 |
| 16                                                       | 1.526031000  | -1.848940000 | -0.918215000 | 16                                                       | 1.522829000  | -1.847976000 | -0.918111000 |
| 6                                                        | 0.499149000  | -0.481800000 | -0.410340000 | 6                                                        | 0.492541000  | -0.482183000 | -0.411896000 |
| 6                                                        | 1.052904000  | 0.810003000  | -0.260726000 | 6                                                        | 1.044671000  | 0.809455000  | -0.260649000 |



|   |              |              |              |   |              |              |              |
|---|--------------|--------------|--------------|---|--------------|--------------|--------------|
| 6 | 5.613878000  | -0.660484000 | 0.716296000  | 6 | 5.609119000  | -0.653298000 | 0.715737000  |
| 6 | 3.983838000  | -2.339920000 | 0.177626000  | 6 | 3.980212000  | -2.334852000 | 0.180559000  |
| 6 | -0.872368000 | -0.700991000 | -0.289740000 | 6 | -0.878961000 | -0.703863000 | -0.294145000 |
| 6 | 0.144036000  | 1.862299000  | -0.037374000 | 6 | 0.134085000  | 1.859051000  | -0.034189000 |
| 6 | -1.231967000 | 1.641038000  | 0.038546000  | 6 | -1.241578000 | 1.635062000  | 0.043875000  |
| 6 | -1.777197000 | 0.354071000  | -0.072361000 | 6 | -1.787194000 | 0.347996000  | -0.071828000 |
| 1 | -1.246147000 | -1.718382000 | -0.421173000 | 1 | -1.250454000 | -1.721423000 | -0.430889000 |
| 1 | 0.503625000  | 2.880348000  | 0.093013000  | 1 | 0.491832000  | 2.877622000  | 0.098225000  |
| 1 | -1.886233000 | 2.493247000  | 0.231364000  | 1 | -1.895888000 | 2.486215000  | 0.241586000  |
| 6 | 5.269471000  | -2.006339000 | 0.611594000  | 6 | 5.265840000  | -1.999671000 | 0.613573000  |
| 1 | 4.984858000  | 1.375791000  | 0.533966000  | 1 | 4.978186000  | 1.382195000  | 0.530637000  |
| 1 | 6.612221000  | -0.369170000 | 1.049577000  | 1 | 6.607488000  | -0.360556000 | 1.047846000  |
| 1 | 3.688615000  | -3.386578000 | 0.076201000  | 1 | 3.685938000  | -3.381935000 | 0.080416000  |
| 6 | 2.925350000  | 2.405283000  | -0.539006000 | 6 | 2.915265000  | 2.407448000  | -0.541605000 |
| 1 | 3.888061000  | 2.342546000  | -1.068521000 | 1 | 3.877592000  | 2.346796000  | -1.072310000 |
| 1 | 2.229144000  | 2.899672000  | -1.233359000 | 1 | 2.216856000  | 2.900171000  | -1.235005000 |
| 6 | 3.086481000  | 3.260942000  | 0.727619000  | 6 | 3.076584000  | 3.264792000  | 0.724067000  |
| 1 | 3.806754000  | 2.825370000  | 1.435079000  | 1 | 3.799023000  | 2.831450000  | 1.430733000  |
| 1 | 2.137488000  | 3.385253000  | 1.268876000  | 1 | 2.128104000  | 3.387162000  | 1.266653000  |
| 1 | 3.450543000  | 4.263344000  | 0.447454000  | 1 | 3.437892000  | 4.267879000  | 0.442550000  |
| 6 | -5.113950000 | -1.277950000 | 0.747805000  | 6 | -5.122116000 | -1.304269000 | 0.732085000  |
| 6 | -6.044844000 | -0.358998000 | 0.236128000  | 6 | -6.053604000 | -0.372121000 | 0.237236000  |
| 6 | -5.543725000 | 0.796397000  | -0.378810000 | 6 | -5.556322000 | 0.800629000  | -0.362060000 |
| 6 | -3.742438000 | -1.050907000 | 0.650253000  | 6 | -3.753502000 | -1.068755000 | 0.629326000  |
| 6 | -4.170227000 | 1.027375000  | -0.481522000 | 6 | -4.185637000 | 1.025591000  | -0.460182000 |
| 6 | -3.237346000 | 0.109521000  | 0.031844000  | 6 | -3.245471000 | 0.100373000  | 0.031802000  |
| 1 | -5.470868000 | -2.186350000 | 1.241708000  | 1 | -5.479515000 | -2.220634000 | 1.210276000  |
| 1 | -3.817333000 | 1.925261000  | -0.993586000 | 1 | -3.837028000 | 1.935040000  | -0.954634000 |
| 1 | -6.241163000 | 1.527796000  | -0.796427000 | 1 | -6.256678000 | 1.535725000  | -0.768555000 |
| 1 | -3.049228000 | -1.774770000 | 1.084428000  | 1 | -3.061938000 | -1.801653000 | 1.050882000  |
| 6 | -7.528212000 | -0.614990000 | 0.350540000  | 7 | -7.425110000 | -0.632394000 | 0.279820000  |
| 1 | -7.811287000 | -1.562882000 | -0.137667000 | 1 | -8.013372000 | 0.195753000  | 0.271126000  |
| 1 | -7.841825000 | -0.691521000 | 1.405626000  | 1 | -7.710976000 | -1.273292000 | 1.014296000  |
| 1 | -8.114250000 | 0.191000000  | -0.115522000 | 1 | 5.983644000  | -2.783161000 | 0.862757000  |
| 1 | 5.986491000  | -2.790805000 | 0.859864000  |   |              |              |              |

**Table S8.** Cartesian coordinates (in Angstrom unit) of B3LYP/cc-pVDZ geometries of D6 based donor systems.

|                                                                       |              |              |              |                                                        |              |              |              |
|-----------------------------------------------------------------------|--------------|--------------|--------------|--------------------------------------------------------|--------------|--------------|--------------|
| D6<br>E(RB3LYP) = -497.056838502 a. u.                                |              |              |              | D6-CH <sub>3</sub><br>E(RB3LYP) = -536.375356562 a. u. |              |              |              |
| 6                                                                     | -2.168928000 | -0.271710000 | -0.000006000 | 6                                                      | -2.479449000 | -0.572951000 | -0.000618000 |
| 6                                                                     | -1.929250000 | 1.170351000  | 0.000002000  | 6                                                      | -2.534657000 | 0.886889000  | -0.000063000 |
| 6                                                                     | -0.676830000 | 1.684768000  | 0.000028000  | 6                                                      | -1.410105000 | 1.642655000  | -0.000019000 |
| 6                                                                     | 0.475620000  | 0.815688000  | 0.000027000  | 6                                                      | -0.108600000 | 1.022225000  | -0.000075000 |
| 6                                                                     | 0.237866000  | -0.574527000 | -0.000008000 | 6                                                      | -0.060392000 | -0.385597000 | -0.000082000 |
| 6                                                                     | 1.298182000  | -1.487160000 | -0.000018000 | 6                                                      | 1.160608000  | -1.068600000 | -0.000002000 |
| 6                                                                     | 2.606428000  | -1.009426000 | 0.000008000  | 6                                                      | 2.364129000  | -0.360392000 | 0.000062000  |
| 6                                                                     | 2.866733000  | 0.371569000  | 0.000042000  | 6                                                      | 2.323094000  | 1.051943000  | 0.000054000  |
| 6                                                                     | 1.808859000  | 1.272901000  | 0.000051000  | 6                                                      | 1.112158000  | 1.727869000  | 0.000003000  |
| 1                                                                     | -0.520128000 | 2.767079000  | 0.000043000  | 1                                                      | -1.473823000 | 2.734384000  | 0.000165000  |
| 1                                                                     | 1.996592000  | 2.349447000  | 0.000076000  | 1                                                      | 1.090013000  | 2.820531000  | 0.000028000  |
| 1                                                                     | 3.896160000  | 0.734026000  | 0.000062000  | 1                                                      | 3.259009000  | 1.615642000  | 0.000103000  |
| 1                                                                     | 1.072940000  | -2.554350000 | -0.000045000 | 1                                                      | 1.143829000  | -2.159846000 | -0.000023000 |
| 8                                                                     | -1.027578000 | -1.083614000 | -0.000030000 | 8                                                      | -1.197056000 | -1.139222000 | -0.000214000 |
| 8                                                                     | -3.243748000 | -0.817067000 | -0.000079000 | 8                                                      | -3.421975000 | -1.324869000 | 0.000423000  |
| 1                                                                     | -2.823385000 | 1.793820000  | -0.000010000 | 6                                                      | 3.689295000  | -1.081276000 | 0.000232000  |
| 1                                                                     | 3.436350000  | -1.719293000 | 0.000000000  | 1                                                      | 4.287674000  | -0.809072000 | -0.885366000 |
|                                                                       |              |              |              | 1                                                      | 4.286631000  | -0.810508000 | 0.886985000  |
|                                                                       |              |              |              | 1                                                      | 3.558360000  | -2.172734000 | -0.000704000 |
|                                                                       |              |              |              | 1                                                      | -3.535940000 | 1.317737000  | 0.000189000  |
| D6-C <sub>5</sub> H <sub>11</sub><br>E(RB3LYP) = -693.631324450 a. u. |              |              |              | D6-isopropyl<br>E(RB3LYP) = -615.002952802 a. u.       |              |              |              |
| 6                                                                     | -4.360268000 | -0.776307000 | -0.000033000 | 6                                                      | 2.977689000  | -0.915677000 | -0.000192000 |
| 6                                                                     | -4.563311000 | 0.671165000  | -0.000070000 | 6                                                      | 3.350566000  | 0.497068000  | -0.000118000 |
| 6                                                                     | -3.521257000 | 1.536596000  | -0.000086000 | 6                                                      | 2.418940000  | 1.480340000  | 0.000052000  |
| 6                                                                     | -2.163750000 | 1.050575000  | -0.000063000 | 6                                                      | 1.012961000  | 1.159530000  | 0.000106000  |
| 6                                                                     | -1.972472000 | -0.347596000 | -0.000022000 | 6                                                      | 0.657281000  | -0.205482000 | -0.000017000 |
| 6                                                                     | -0.692157000 | -0.899834000 | 0.000003000  | 6                                                      | -0.680045000 | -0.606230000 | 0.000000000  |
| 6                                                                     | 0.440679000  | -0.075081000 | -0.000011000 | 6                                                      | -1.704539000 | 0.347756000  | 0.000149000  |
| 6                                                                     | 0.255718000  | 1.322403000  | -0.000052000 | 6                                                      | -1.354087000 | 1.713822000  | 0.000274000  |
| 6                                                                     | -1.022215000 | 1.871780000  | -0.000077000 | 6                                                      | -0.022965000 | 2.112388000  | 0.000248000  |
| 1                                                                     | -3.694503000 | 2.616448000  | -0.000116000 | 1                                                      | 2.719914000  | 2.531721000  | 0.000127000  |
| 1                                                                     | -1.152300000 | 2.956930000  | -0.000108000 | 1                                                      | 0.234992000  | 3.174385000  | 0.000340000  |
| 1                                                                     | 1.118569000  | 1.988059000  | -0.000063000 | 1                                                      | -2.144572000 | 2.467815000  | 0.000388000  |
| 1                                                                     | -0.598042000 | -1.987837000 | 0.000035000  | 1                                                      | -0.891508000 | -1.676577000 | -0.000102000 |

|                                                |              |              |              |                                           |              |              |              |
|------------------------------------------------|--------------|--------------|--------------|-------------------------------------------|--------------|--------------|--------------|
| 8                                              | -3.029506000 | -1.211855000 | -0.000007000 | 8                                         | 1.604326000  | -1.188710000 | -0.000154000 |
| 8                                              | -5.223779000 | -1.618006000 | -0.000010000 | 8                                         | 3.734643000  | -1.854387000 | -0.000523000 |
| 6                                              | 1.813128000  | -0.725914000 | 0.000013000  | 6                                         | -3.167892000 | -0.074420000 | 0.000158000  |
| 1                                              | 1.873398000  | -1.396209000 | -0.877244000 | 1                                         | -3.765861000 | 0.853313000  | 0.000345000  |
| 1                                              | 1.873365000  | -1.396213000 | 0.877269000  | 6                                         | -3.534834000 | -0.862950000 | 1.270173000  |
| 6                                              | 3.027201000  | 0.206204000  | 0.000038000  | 6                                         | -3.534957000 | -0.862520000 | -1.270091000 |
| 1                                              | 2.989185000  | 0.868475000  | -0.883874000 | 1                                         | -3.303334000 | -0.287243000 | -2.180315000 |
| 1                                              | 2.989142000  | 0.868483000  | 0.883942000  | 1                                         | -2.983109000 | -1.815582000 | -1.325306000 |
| 6                                              | 4.356949000  | -0.555854000 | 0.000072000  | 1                                         | -4.611371000 | -1.099882000 | -1.279298000 |
| 1                                              | 4.396990000  | -1.222002000 | -0.882474000 | 1                                         | -2.982997000 | -1.816040000 | 1.325007000  |
| 1                                              | 4.396950000  | -1.221993000 | 0.882628000  | 1                                         | -4.611251000 | -1.100301000 | 1.279409000  |
| 6                                              | 5.586896000  | 0.358029000  | 0.000095000  | 1                                         | -3.303112000 | -0.287988000 | 2.180571000  |
| 1                                              | 5.545282000  | 1.023172000  | -0.882236000 | 1                                         | 4.421750000  | 0.699398000  | -0.000207000 |
| 1                                              | 5.545242000  | 1.023182000  | 0.882418000  |                                           |              |              |              |
| 6                                              | 6.910756000  | -0.409549000 | 0.000130000  |                                           |              |              |              |
| 1                                              | 6.998106000  | -1.057161000 | -0.888947000 |                                           |              |              |              |
| 1                                              | 6.998065000  | -1.057151000 | 0.889218000  |                                           |              |              |              |
| 1                                              | 7.774450000  | 0.274538000  | 0.000146000  |                                           |              |              |              |
| 1                                              | -5.602997000 | 0.998450000  | -0.000086000 |                                           |              |              |              |
| D6-t-butyl<br>E(RB3LYP) = -654.313904858 a. u. |              |              |              | D6-OH<br>E(RB3LYP) = -572.285516562 a. u. |              |              |              |
| 6                                              | -3.347883000 | -0.803411000 | -0.000731000 | 6                                         | -2.465986000 | -0.534341000 | -0.000636000 |
| 6                                              | -3.632912000 | 0.629766000  | 0.000016000  | 6                                         | -2.491621000 | 0.923372000  | -0.000027000 |
| 6                                              | -2.641677000 | 1.553414000  | 0.000062000  | 6                                         | -1.349628000 | 1.655632000  | 0.000002000  |
| 6                                              | -1.259346000 | 1.144132000  | -0.000064000 | 6                                         | -0.062100000 | 1.013596000  | -0.000078000 |
| 6                                              | -0.988816000 | -0.236280000 | -0.000110000 | 6                                         | -0.040845000 | -0.397455000 | -0.000079000 |
| 6                                              | 0.322869000  | -0.724050000 | -0.000048000 | 6                                         | 1.162690000  | -1.106568000 | 0.000004000  |
| 6                                              | 1.410686000  | 0.153932000  | 0.000041000  | 6                                         | 2.369557000  | -0.402073000 | 0.000057000  |
| 6                                              | 1.139363000  | 1.543933000  | 0.000056000  | 6                                         | 2.375569000  | 1.008284000  | 0.000052000  |
| 6                                              | -0.160363000 | 2.026350000  | 0.000022000  | 6                                         | 1.173335000  | 1.695427000  | 0.000001000  |
| 1                                              | -2.876157000 | 2.621580000  | 0.000325000  | 1                                         | -1.392576000 | 2.748434000  | 0.000206000  |
| 1                                              | -0.346718000 | 3.103260000  | 0.000081000  | 1                                         | 1.171960000  | 2.788030000  | 0.000038000  |
| 1                                              | 1.964056000  | 2.257943000  | 0.000102000  | 1                                         | 3.334121000  | 1.527970000  | 0.000112000  |
| 1                                              | 0.449699000  | -1.805078000 | -0.000093000 | 1                                         | 1.131768000  | -2.198366000 | -0.000001000 |
| 8                                              | -1.993182000 | -1.160558000 | -0.000259000 | 8                                         | -1.189236000 | -1.127178000 | -0.000207000 |
| 8                                              | -4.161000000 | -1.693967000 | 0.000603000  | 8                                         | -3.417467000 | -1.274287000 | 0.000518000  |
| 6                                              | 2.868142000  | -0.341787000 | 0.000032000  | 8                                         | 3.577847000  | -1.022869000 | 0.000123000  |
| 6                                              | 2.962378000  | -1.878060000 | -0.000588000 | 1                                         | 3.442824000  | -1.982506000 | 0.000121000  |
| 1                                              | 2.490331000  | -2.319733000 | 0.891008000  | 1                                         | -3.483073000 | 1.375874000  | 0.000277000  |

|                                                         |              |              |              |                                                                       |              |              |              |
|---------------------------------------------------------|--------------|--------------|--------------|-----------------------------------------------------------------------|--------------|--------------|--------------|
| 1                                                       | 2.491019000  | -2.318980000 | -0.892918000 |                                                                       |              |              |              |
| 1                                                       | 4.020324000  | -2.183864000 | -0.000318000 |                                                                       |              |              |              |
| 6                                                       | 3.587016000  | 0.188992000  | -1.262462000 |                                                                       |              |              |              |
| 1                                                       | 3.096885000  | -0.176229000 | -2.179173000 |                                                                       |              |              |              |
| 1                                                       | 3.595545000  | 1.289124000  | -1.300729000 |                                                                       |              |              |              |
| 1                                                       | 4.634852000  | -0.153650000 | -1.275819000 |                                                                       |              |              |              |
| 6                                                       | 3.586720000  | 0.187943000  | 1.263139000  |                                                                       |              |              |              |
| 1                                                       | 4.634498000  | -0.154874000 | 1.276551000  |                                                                       |              |              |              |
| 1                                                       | 3.595421000  | 1.288042000  | 1.302236000  |                                                                       |              |              |              |
| 1                                                       | 3.096260000  | -0.177890000 | 2.179429000  |                                                                       |              |              |              |
| 1                                                       | -4.689607000 | 0.897309000  | 0.000376000  |                                                                       |              |              |              |
| D6-OCH <sub>3</sub><br>E(RB3LYP) = -611.585898334 a. u. |              |              |              | D6-OC <sub>2</sub> H <sub>5</sub><br>E(RB3LYP) = -650.906112819 a. u. |              |              |              |
| 6                                                       | -2.875318000 | -0.600689000 | 0.000071000  | 6                                                                     | -3.265038000 | -0.776539000 | -0.000022000 |
| 6                                                       | -2.955342000 | 0.856423000  | -0.000179000 | 6                                                                     | -3.477974000 | 0.667318000  | 0.000047000  |
| 6                                                       | -1.842420000 | 1.630604000  | -0.000176000 | 6                                                                     | -2.440240000 | 1.539675000  | 0.000039000  |
| 6                                                       | -0.532195000 | 1.034725000  | -0.000066000 | 6                                                                     | -1.081234000 | 1.065454000  | -0.000004000 |
| 6                                                       | -0.457558000 | -0.378265000 | 0.000004000  | 6                                                                     | -0.878096000 | -0.334582000 | -0.000030000 |
| 6                                                       | 0.766254000  | -1.039397000 | 0.000070000  | 6                                                                     | 0.400528000  | -0.881798000 | -0.000057000 |
| 6                                                       | 1.953395000  | -0.294118000 | 0.000072000  | 6                                                                     | 1.516423000  | -0.032860000 | -0.000065000 |
| 6                                                       | 1.907121000  | 1.116188000  | 0.000003000  | 6                                                                     | 1.340921000  | 1.367872000  | -0.000044000 |
| 6                                                       | 0.673448000  | 1.757467000  | -0.000068000 | 6                                                                     | 0.054132000  | 1.894330000  | -0.000012000 |
| 1                                                       | -1.925251000 | 2.721180000  | -0.000291000 | 1                                                                     | -2.621881000 | 2.618230000  | 0.000074000  |
| 1                                                       | 0.633719000  | 2.849437000  | -0.000135000 | 1                                                                     | -0.084332000 | 2.978238000  | 0.000007000  |
| 1                                                       | 2.821130000  | 1.707615000  | -0.000009000 | 1                                                                     | 2.196747000  | 2.040518000  | -0.000057000 |
| 1                                                       | 0.804129000  | -2.128387000 | 0.000127000  | 1                                                                     | 0.536542000  | -1.962919000 | -0.000073000 |
| 8                                                       | -1.582786000 | -1.147717000 | 0.000028000  | 8                                                                     | -1.929125000 | -1.203599000 | -0.000026000 |
| 8                                                       | -3.803387000 | -1.370424000 | -0.000269000 | 8                                                                     | -4.119846000 | -1.627323000 | 0.000061000  |
| 8                                                       | 3.098102000  | -1.023565000 | 0.000121000  | 8                                                                     | 2.721549000  | -0.654795000 | -0.000110000 |
| 6                                                       | 4.344537000  | -0.339853000 | 0.000338000  | 6                                                                     | 3.917889000  | 0.132309000  | 0.000038000  |
| 1                                                       | 4.464267000  | 0.287811000  | -0.900023000 | 1                                                                     | 3.936057000  | 0.781777000  | 0.894343000  |
| 1                                                       | 4.463922000  | 0.287866000  | 0.900704000  | 1                                                                     | 3.936236000  | 0.781845000  | -0.894215000 |
| 1                                                       | 5.114175000  | -1.122149000 | 0.000505000  | 6                                                                     | 5.090922000  | -0.828893000 | 0.000114000  |
| 1                                                       | -3.963054000 | 1.271769000  | -0.000331000 | 1                                                                     | 5.065812000  | -1.472867000 | -0.892281000 |
|                                                         |              |              |              | 1                                                                     | 5.065660000  | -1.472916000 | 0.892470000  |
|                                                         |              |              |              | 1                                                                     | 6.038688000  | -0.268288000 | 0.000208000  |
|                                                         |              |              |              | 1                                                                     | -4.519550000 | 0.988401000  | 0.000095000  |

|                                                          |              |              |              |                                                                         |              |              |              |
|----------------------------------------------------------|--------------|--------------|--------------|-------------------------------------------------------------------------|--------------|--------------|--------------|
| D6-NH <sub>2</sub><br>E(RB3LYP) = -552.420154689 a. u.   |              |              |              | D6-N(CH <sub>3</sub> ) <sub>2</sub><br>E(RB3LYP) = -631.031239869 a. u. |              |              |              |
| 6                                                        | -2.473926000 | -0.545271000 | 0.001812000  | 6                                                                       | 3.087582000  | -0.751215000 | -0.000669000 |
| 6                                                        | -2.511118000 | 0.911617000  | 0.003594000  | 6                                                                       | 3.334570000  | 0.684280000  | -0.000061000 |
| 6                                                        | -1.371934000 | 1.650787000  | 0.002742000  | 6                                                                       | 2.313759000  | 1.580823000  | -0.000071000 |
| 6                                                        | -0.082873000 | 1.018335000  | -0.000935000 | 6                                                                       | 0.948197000  | 1.140287000  | -0.000153000 |
| 6                                                        | -0.047830000 | -0.394353000 | -0.004778000 | 6                                                                       | 0.707858000  | -0.251377000 | -0.000118000 |
| 6                                                        | 1.155765000  | -1.095885000 | -0.006021000 | 6                                                                       | -0.580219000 | -0.778601000 | -0.000022000 |
| 6                                                        | 2.373928000  | -0.396035000 | -0.005403000 | 6                                                                       | -1.702144000 | 0.081725000  | -0.000005000 |
| 6                                                        | 2.354075000  | 1.022354000  | -0.001164000 | 6                                                                       | -1.467390000 | 1.489151000  | -0.000041000 |
| 6                                                        | 1.149685000  | 1.703978000  | 0.001039000  | 6                                                                       | -0.177223000 | 1.988740000  | -0.000100000 |
| 1                                                        | -1.421459000 | 2.743597000  | 0.004796000  | 1                                                                       | 2.520825000  | 2.654980000  | 0.000113000  |
| 1                                                        | 1.144686000  | 2.796819000  | 0.005998000  | 1                                                                       | -0.020805000 | 3.070519000  | -0.000095000 |
| 1                                                        | 3.297872000  | 1.572510000  | -0.004124000 | 1                                                                       | -2.302715000 | 2.186396000  | -0.000032000 |
| 1                                                        | 1.127125000  | -2.186961000 | -0.010453000 | 1                                                                       | -0.677664000 | -1.861701000 | 0.000035000  |
| 8                                                        | -1.194334000 | -1.130376000 | -0.003112000 | 8                                                                       | 1.737961000  | -1.145550000 | -0.000214000 |
| 8                                                        | -3.420790000 | -1.292510000 | 0.004325000  | 8                                                                       | 3.917544000  | -1.627533000 | 0.000610000  |
| 7                                                        | 3.577994000  | -1.076421000 | -0.065395000 | 7                                                                       | -2.982793000 | -0.424426000 | 0.000048000  |
| 1                                                        | 3.563199000  | -2.044868000 | 0.235326000  | 6                                                                       | -4.126658000 | 0.470413000  | 0.000472000  |
| 1                                                        | 4.394296000  | -0.573606000 | 0.265046000  | 1                                                                       | -4.143969000 | 1.121615000  | 0.893384000  |
| 1                                                        | -3.505325000 | 1.357393000  | 0.006165000  | 1                                                                       | -4.144664000 | 1.121624000  | -0.892427000 |
|                                                          |              |              |              | 1                                                                       | -5.048087000 | -0.124803000 | 0.000834000  |
|                                                          |              |              |              | 6                                                                       | -3.195706000 | -1.861233000 | -0.000090000 |
|                                                          |              |              |              | 1                                                                       | -4.273208000 | -2.066635000 | -0.000433000 |
|                                                          |              |              |              | 1                                                                       | -2.756136000 | -2.343162000 | -0.892199000 |
|                                                          |              |              |              | 1                                                                       | -2.756644000 | -2.343329000 | 0.892192000  |
|                                                          |              |              |              | 1                                                                       | 4.382814000  | 0.982199000  | 0.000270000  |
| D6-PhCH <sub>3</sub><br>E(RB3LYP) = -767.445767092 a. u. |              |              |              | D6-PhNH <sub>2</sub><br>E(RB3LYP) = -783.489103748 a. u.                |              |              |              |
| 6                                                        | 4.192978000  | -1.109112000 | -0.171516000 | 6                                                                       | -4.186774000 | -1.101584000 | 0.166698000  |
| 6                                                        | 4.673718000  | 0.257464000  | 0.018934000  | 6                                                                       | -4.664842000 | 0.266509000  | -0.015938000 |
| 6                                                        | 3.820289000  | 1.299155000  | 0.169517000  | 6                                                                       | -3.807528000 | 1.306696000  | -0.161160000 |
| 6                                                        | 2.394725000  | 1.088256000  | 0.145689000  | 6                                                                       | -2.383883000 | 1.092705000  | -0.139316000 |
| 6                                                        | 1.934658000  | -0.232526000 | -0.033763000 | 6                                                                       | -1.925553000 | -0.230031000 | 0.031486000  |
| 6                                                        | 0.570840000  | -0.526944000 | -0.073093000 | 6                                                                       | -0.563230000 | -0.527898000 | 0.070015000  |
| 6                                                        | -0.379952000 | 0.494292000  | 0.069536000  | 6                                                                       | 0.393709000  | 0.490092000  | -0.068558000 |
| 6                                                        | 0.077426000  | 1.821619000  | 0.251804000  | 6                                                                       | -0.064076000 | 1.820021000  | -0.243372000 |
| 6                                                        | 1.433763000  | 2.108757000  | 0.288341000  | 6                                                                       | -1.419063000 | 2.111067000  | -0.275795000 |

|   |              |              |              |   |              |              |              |
|---|--------------|--------------|--------------|---|--------------|--------------|--------------|
| 1 | 4.200965000  | 2.314574000  | 0.310363000  | 1 | -4.185521000 | 2.324117000  | -0.296047000 |
| 1 | 1.773321000  | 3.136406000  | 0.439355000  | 1 | -1.755546000 | 3.140717000  | -0.420760000 |
| 1 | -0.647019000 | 2.624690000  | 0.393360000  | 1 | 0.660444000  | 2.623164000  | -0.384046000 |
| 1 | 0.273081000  | -1.561989000 | -0.242411000 | 1 | -0.270543000 | -1.564803000 | 0.236586000  |
| 8 | 2.801908000  | -1.275168000 | -0.186249000 | 8 | -2.796119000 | -1.271526000 | 0.178977000  |
| 8 | 4.874876000  | -2.093143000 | -0.314491000 | 8 | -4.870368000 | -2.085653000 | 0.305121000  |
| 6 | -4.619644000 | -0.402666000 | -0.042283000 | 6 | 4.630598000  | -0.417997000 | 0.036855000  |
| 6 | -3.703098000 | -1.291293000 | 0.544242000  | 6 | 3.705394000  | -1.330255000 | -0.508360000 |
| 6 | -4.114386000 | 0.784918000  | -0.589052000 | 6 | 4.135519000  | 0.799005000  | 0.545440000  |
| 1 | -4.065664000 | -2.222353000 | 0.988739000  | 1 | 4.063098000  | -2.276475000 | -0.923237000 |
| 1 | -4.800276000 | 1.493597000  | -1.060722000 | 1 | 4.829435000  | 1.521635000  | 0.983445000  |
| 6 | -2.340021000 | -1.006343000 | 0.580224000  | 6 | 2.346681000  | -1.034605000 | -0.538146000 |
| 6 | -2.749728000 | 1.077678000  | -0.552387000 | 6 | 2.775089000  | 1.086984000  | 0.504488000  |
| 1 | -1.660214000 | -1.709377000 | 1.066092000  | 1 | 1.663363000  | -1.757640000 | -0.988274000 |
| 1 | -2.390720000 | 2.001049000  | -1.011727000 | 1 | 2.426847000  | 2.028819000  | 0.933579000  |
| 6 | -1.832236000 | 0.187515000  | 0.032036000  | 6 | 1.841823000  | 0.180478000  | -0.035125000 |
| 6 | -6.093233000 | -0.726054000 | -0.079368000 | 7 | 5.995920000  | -0.684147000 | 0.016077000  |
| 1 | -6.492026000 | -0.891848000 | 0.935486000  | 1 | 6.246422000  | -1.667261000 | -0.019790000 |
| 1 | -6.674044000 | 0.085611000  | -0.541576000 | 1 | 6.547178000  | -0.180657000 | 0.703884000  |
| 1 | -6.285567000 | -1.647762000 | -0.654319000 | 1 | -5.747909000 | 0.387732000  | -0.025926000 |
| 1 | 5.757301000  | 0.375598000  | 0.030109000  |   |              |              |              |

**Table S9.** Cartesian coordinates (in Angstrom unit) of B3LYP/cc-pVDZ optimized geometries of benzene based D- $\pi$ -A systems.

| D1<br>E(RB3LYP) = -749.742344106 a. u. |              |              |              | D1-CH <sub>3</sub><br>E(RB3LYP) = -784.652966670 a. u. |              |              |              |
|----------------------------------------|--------------|--------------|--------------|--------------------------------------------------------|--------------|--------------|--------------|
| 6                                      | 6.357744000  | 0.474263000  | -0.000036000 | 6                                                      | 5.879651000  | 0.278923000  | -0.000011000 |
| 6                                      | 6.024458000  | -0.883126000 | -0.000331000 | 6                                                      | 5.491164000  | -1.067794000 | -0.000017000 |
| 6                                      | 5.340030000  | 1.437344000  | 0.000247000  | 6                                                      | 4.864056000  | 1.255018000  | -0.000002000 |
| 1                                      | 5.594396000  | 2.499522000  | 0.000491000  | 1                                                      | 5.139039000  | 2.313274000  | 0.000009000  |
| 1                                      | 6.810777000  | -1.641118000 | -0.000591000 | 1                                                      | 6.256206000  | -1.848351000 | -0.000032000 |
| 6                                      | 4.002990000  | 1.049874000  | 0.000329000  | 6                                                      | 3.520504000  | 0.903004000  | -0.000002000 |
| 6                                      | 4.685311000  | -1.272498000 | -0.000246000 | 6                                                      | 4.143874000  | -1.427760000 | -0.000013000 |
| 1                                      | 3.226402000  | 1.816662000  | 0.000623000  | 1                                                      | 2.766178000  | 1.691902000  | -0.000005000 |
| 1                                      | 4.429107000  | -2.335163000 | -0.000423000 | 1                                                      | 3.869024000  | -2.485856000 | -0.000019000 |
| 6                                      | 3.647030000  | -0.317111000 | 0.000061000  | 6                                                      | 3.125281000  | -0.454166000 | -0.000008000 |
| 6                                      | 2.264047000  | -0.784335000 | 0.000099000  | 6                                                      | 1.733239000  | -0.886272000 | -0.000009000 |
| 6                                      | 1.131312000  | -0.031456000 | 0.000005000  | 6                                                      | 0.618191000  | -0.105869000 | -0.000016000 |
| 6                                      | -0.184398000 | -0.605448000 | 0.000059000  | 6                                                      | -0.709954000 | -0.647908000 | -0.000008000 |

|                                                                       |              |              |              |                                                  |              |              |              |
|-----------------------------------------------------------------------|--------------|--------------|--------------|--------------------------------------------------|--------------|--------------|--------------|
| 6                                                                     | -1.344282000 | 0.116842000  | -0.000028000 | 6                                                | -1.853873000 | 0.100621000  | -0.000010000 |
| 6                                                                     | -2.630078000 | -0.506022000 | 0.000036000  | 6                                                | -3.152524000 | -0.493063000 | -0.000001000 |
| 6                                                                     | -3.841555000 | 0.133352000  | -0.000036000 | 6                                                | -4.350585000 | 0.172341000  | 0.000000000  |
| 6                                                                     | -3.942015000 | 1.559723000  | -0.000198000 | 6                                                | -4.420080000 | 1.600446000  | -0.000010000 |
| 7                                                                     | -3.985265000 | 2.724429000  | -0.000252000 | 7                                                | -4.437932000 | 2.765887000  | -0.000011000 |
| 6                                                                     | -5.077561000 | -0.694270000 | 0.000052000  | 6                                                | -5.603457000 | -0.628131000 | 0.000015000  |
| 8                                                                     | -5.093121000 | -1.908081000 | 0.000188000  | 8                                                | -5.646027000 | -1.841529000 | 0.000019000  |
| 8                                                                     | -6.197890000 | 0.059541000  | -0.000017000 | 8                                                | -6.707977000 | 0.149378000  | 0.000011000  |
| 1                                                                     | -6.944066000 | -0.567085000 | 0.000055000  | 1                                                | -7.466640000 | -0.461998000 | 0.000017000  |
| 1                                                                     | 2.143206000  | -1.874036000 | 0.000198000  | 1                                                | 1.585425000  | -1.972744000 | 0.000000000  |
| 1                                                                     | 1.192450000  | 1.061225000  | -0.000132000 | 1                                                | 0.706214000  | 0.985001000  | -0.000026000 |
| 1                                                                     | -0.250525000 | -1.700236000 | 0.000182000  | 1                                                | -0.801796000 | -1.740922000 | 0.000002000  |
| 1                                                                     | -1.299745000 | 1.210638000  | -0.000149000 | 1                                                | -1.784530000 | 1.193120000  | -0.000020000 |
| 1                                                                     | -2.680426000 | -1.599361000 | 0.000148000  | 1                                                | -3.226949000 | -1.585059000 | 0.000008000  |
| 1                                                                     | 7.405155000  | 0.783477000  | -0.000071000 | 6                                                | 7.332292000  | 0.682939000  | 0.000040000  |
|                                                                       |              |              |              | 1                                                | 7.575978000  | 1.293015000  | 0.886244000  |
|                                                                       |              |              |              | 1                                                | 7.996893000  | -0.193155000 | -0.000387000 |
|                                                                       |              |              |              | 1                                                | 7.575831000  | 1.293797000  | -0.885658000 |
| D1-C <sub>5</sub> H <sub>11</sub><br>E(RB3LYP) = -941.909101875 a. u. |              |              |              | D1-isopropyl<br>E(RB3LYP) = -863.280577609 a. u. |              |              |              |
| 6                                                                     | 3.830108000  | -1.001819000 | 0.000219000  | 6                                                | 5.002137000  | -0.143311000 | -0.000320000 |
| 6                                                                     | 3.217041000  | -2.267629000 | -0.000116000 | 6                                                | 4.543064000  | -1.468362000 | -0.001144000 |
| 6                                                                     | 2.991255000  | 0.125757000  | 0.000459000  | 6                                                | 4.035201000  | 0.881494000  | 0.000640000  |
| 1                                                                     | 3.423838000  | 1.126907000  | 0.000690000  | 1                                                | 4.353170000  | 1.926660000  | 0.001314000  |
| 1                                                                     | 3.842480000  | -3.164760000 | -0.000350000 | 1                                                | 5.268056000  | -2.286651000 | -0.001937000 |
| 6                                                                     | 1.603872000  | -0.001793000 | 0.000415000  | 6                                                | 2.675164000  | 0.596205000  | 0.000783000  |
| 6                                                                     | 1.833202000  | -2.401100000 | -0.000152000 | 6                                                | 3.180124000  | -1.762030000 | -0.000977000 |
| 1                                                                     | 0.992766000  | 0.902680000  | 0.000627000  | 1                                                | 1.961555000  | 1.422177000  | 0.001620000  |
| 1                                                                     | 1.386740000  | -3.399075000 | -0.000401000 | 1                                                | 2.853019000  | -2.805212000 | -0.001618000 |
| 6                                                                     | 0.987990000  | -1.269818000 | 0.000114000  | 6                                                | 2.211471000  | -0.738537000 | -0.000044000 |
| 6                                                                     | -0.456277000 | -1.465799000 | 0.000036000  | 6                                                | 0.799373000  | -1.100078000 | 0.000024000  |
| 6                                                                     | -1.427613000 | -0.512290000 | 0.000076000  | 6                                                | -0.274959000 | -0.264554000 | -0.000032000 |
| 6                                                                     | -2.826614000 | -0.828451000 | -0.000008000 | 6                                                | -1.628694000 | -0.739152000 | 0.000046000  |
| 6                                                                     | -3.832418000 | 0.097633000  | 0.000021000  | 6                                                | -2.733585000 | 0.065857000  | -0.000019000 |
| 6                                                                     | -5.210585000 | -0.275304000 | -0.000068000 | 6                                                | -4.060363000 | -0.462007000 | 0.000065000  |
| 6                                                                     | -6.283905000 | 0.577042000  | -0.000049000 | 6                                                | -5.223633000 | 0.262490000  | 0.000021000  |
| 6                                                                     | -6.119013000 | 1.997272000  | 0.000065000  | 6                                                | -5.221681000 | 1.692286000  | -0.000109000 |
| 7                                                                     | -5.946159000 | 3.149977000  | 0.000185000  | 7                                                | -5.181243000 | 2.857161000  | -0.000293000 |
| 6                                                                     | -7.650589000 | -0.007817000 | -0.000153000 | 6                                                | -6.514927000 | -0.474413000 | 0.000112000  |

|                                              |              |              |              |                                           |              |              |              |
|----------------------------------------------|--------------|--------------|--------------|-------------------------------------------|--------------|--------------|--------------|
| 8                                            | -7.891193000 | -1.197945000 | -0.000255000 | 8                                         | -6.618016000 | -1.684175000 | 0.000236000  |
| 8                                            | -8.613363000 | 0.939735000  | -0.000121000 | 8                                         | -7.579253000 | 0.357264000  | 0.000060000  |
| 1                                            | -9.461570000 | 0.460280000  | -0.000195000 | 1                                         | -8.367488000 | -0.215481000 | 0.000133000  |
| 1                                            | -0.781659000 | -2.512939000 | -0.000082000 | 1                                         | 0.597124000  | -2.177742000 | 0.000057000  |
| 1                                            | -1.160832000 | 0.549124000  | 0.000165000  | 1                                         | -0.132099000 | 0.820490000  | -0.000192000 |
| 1                                            | -3.096798000 | -1.891546000 | -0.000102000 | 1                                         | -1.775327000 | -1.826173000 | 0.000167000  |
| 1                                            | -3.584871000 | 1.163970000  | 0.000116000  | 1                                         | -2.609521000 | 1.153500000  | -0.000133000 |
| 1                                            | -5.462683000 | -1.340414000 | -0.000163000 | 1                                         | -4.189385000 | -1.548903000 | 0.000176000  |
| 6                                            | 5.344929000  | -0.912196000 | 0.000246000  | 6                                         | 6.491625000  | 0.168039000  | -0.000348000 |
| 1                                            | 5.721634000  | -1.470975000 | -0.876845000 | 1                                         | 7.019564000  | -0.801492000 | -0.001649000 |
| 1                                            | 5.721579000  | -1.470702000 | 0.877539000  | 6                                         | 6.917448000  | 0.925462000  | 1.270588000  |
| 6                                            | 5.960649000  | 0.489193000  | 0.000050000  | 6                                         | 6.916865000  | 0.928495000  | -1.269661000 |
| 1                                            | 5.607751000  | 1.051143000  | -0.883734000 | 1                                         | 6.644538000  | 0.372466000  | -2.180565000 |
| 1                                            | 5.607928000  | 1.051320000  | 0.883792000  | 1                                         | 6.436833000  | 1.919821000  | -1.324925000 |
| 6                                            | 7.492998000  | 0.462565000  | -0.000083000 | 1                                         | 8.007768000  | 1.086795000  | -1.278078000 |
| 1                                            | 7.849095000  | -0.101873000 | -0.882677000 | 1                                         | 6.437234000  | 1.916541000  | 1.328516000  |
| 1                                            | 7.849251000  | -0.101733000 | 0.882537000  | 1                                         | 8.008331000  | 1.083915000  | 1.278763000  |
| 6                                            | 8.130332000  | 1.856059000  | -0.000251000 | 1                                         | 6.645709000  | 0.367158000  | 2.180272000  |
| 1                                            | 7.773198000  | 2.418722000  | -0.882541000 |                                           |              |              |              |
| 1                                            | 7.773358000  | 2.418862000  | 0.882014000  |                                           |              |              |              |
| 6                                            | 9.660202000  | 1.821422000  | -0.000387000 |                                           |              |              |              |
| 1                                            | 10.048779000 | 1.296050000  | -0.889503000 |                                           |              |              |              |
| 1                                            | 10.048941000 | 1.296193000  | 0.888742000  |                                           |              |              |              |
| 1                                            | 10.087270000 | 2.837048000  | -0.000508000 |                                           |              |              |              |
| D1-t-but<br>E(RB3LYP) = -902.591347521 a. u. |              |              |              | D1-OH<br>E(RB3LYP) = -820.563021181 a. u. |              |              |              |
| 6                                            | -4.620590000 | -0.036443000 | -0.000065000 | 6                                         | -5.880544000 | 0.285186000  | 0.000105000  |
| 6                                            | -4.172749000 | -1.366488000 | 0.000156000  | 6                                         | -5.512938000 | -1.068359000 | 0.000710000  |
| 6                                            | -3.630879000 | 0.970291000  | -0.000267000 | 6                                         | -4.882300000 | 1.274636000  | -0.000703000 |
| 1                                            | -3.927548000 | 2.020934000  | -0.000455000 | 1                                         | -5.164217000 | 2.331814000  | -0.001249000 |
| 1                                            | -4.888461000 | -2.187978000 | 0.000307000  | 1                                         | -6.297154000 | -1.826858000 | 0.001294000  |
| 6                                            | -2.275260000 | 0.669947000  | -0.000267000 | 6                                         | -3.540319000 | 0.914862000  | -0.000861000 |
| 6                                            | -2.811804000 | -1.675474000 | 0.000136000  | 6                                         | -4.168018000 | -1.415842000 | 0.000509000  |
| 1                                            | -1.553390000 | 1.488735000  | -0.000406000 | 1                                         | -2.787401000 | 1.704709000  | -0.001553000 |
| 1                                            | -2.501903000 | -2.723966000 | 0.000315000  | 1                                         | -3.892287000 | -2.473493000 | 0.000949000  |
| 6                                            | -1.827290000 | -0.669805000 | -0.000053000 | 6                                         | -3.144645000 | -0.440895000 | -0.000225000 |
| 6                                            | -0.420742000 | -1.051130000 | -0.000056000 | 6                                         | -1.755268000 | -0.871744000 | -0.000280000 |
| 6                                            | 0.664602000  | -0.229950000 | -0.000002000 | 6                                         | -0.636818000 | -0.093954000 | -0.000060000 |
| 6                                            | 2.011975000  | -0.722300000 | -0.000031000 | 6                                         | 0.688441000  | -0.639106000 | -0.000165000 |



|                                                         |              |              |              |                                                                       |              |              |              |
|---------------------------------------------------------|--------------|--------------|--------------|-----------------------------------------------------------------------|--------------|--------------|--------------|
| 6                                                       | 3.127421000  | 0.068047000  | 0.000021000  | 6                                                                     | 1.836290000  | 0.105114000  | 0.000036000  |
| 6                                                       | 4.447087000  | -0.477302000 | -0.000020000 | 6                                                                     | 3.131638000  | -0.493071000 | -0.000082000 |
| 6                                                       | 5.619879000  | 0.231714000  | 0.000019000  | 6                                                                     | 4.333475000  | 0.167201000  | 0.000079000  |
| 6                                                       | 5.636910000  | 1.661406000  | 0.000107000  | 6                                                                     | 4.408482000  | 1.594867000  | 0.000394000  |
| 7                                                       | 5.611986000  | 2.826719000  | 0.000182000  | 7                                                                     | 4.429775000  | 2.760350000  | 0.000626000  |
| 6                                                       | 6.901279000  | -0.522218000 | -0.000032000 | 6                                                                     | 5.582080000  | -0.638159000 | -0.000084000 |
| 8                                                       | 6.988385000  | -1.733245000 | -0.000104000 | 8                                                                     | 5.620460000  | -1.851979000 | -0.000359000 |
| 8                                                       | 7.976558000  | 0.295277000  | 0.000012000  | 8                                                                     | 6.690732000  | 0.134316000  | 0.000086000  |
| 1                                                       | 8.757100000  | -0.287903000 | -0.000025000 | 1                                                                     | 7.445821000  | -0.481394000 | -0.000047000 |
| 1                                                       | -0.233446000 | -2.131505000 | -0.000099000 | 1                                                                     | -1.608121000 | -1.958347000 | -0.000463000 |
| 1                                                       | 0.535797000  | 0.856867000  | 0.000081000  | 1                                                                     | -0.721386000 | 0.997332000  | 0.000257000  |
| 1                                                       | 2.144232000  | -1.811167000 | -0.000108000 | 1                                                                     | 0.777011000  | -1.732477000 | -0.000427000 |
| 1                                                       | 3.017724000  | 1.157232000  | 0.000093000  | 1                                                                     | 1.771033000  | 1.197875000  | 0.000291000  |
| 1                                                       | 4.561692000  | -1.565814000 | -0.000088000 | 1                                                                     | 3.201804000  | -1.585388000 | -0.000324000 |
| 6                                                       | -6.110358000 | 0.347807000  | 0.000040000  | 8                                                                     | -7.207428000 | 0.577587000  | 0.000357000  |
| 6                                                       | -6.422416000 | 1.185432000  | 1.262532000  | 1                                                                     | -7.320984000 | 1.539971000  | -0.000027000 |
| 1                                                       | -6.213215000 | 0.611454000  | 2.179504000  |                                                                       |              |              |              |
| 1                                                       | -5.826138000 | 2.109978000  | 1.301251000  |                                                                       |              |              |              |
| 1                                                       | -7.486486000 | 1.473951000  | 1.275326000  |                                                                       |              |              |              |
| 6                                                       | -6.422656000 | 1.185452000  | -1.262404000 |                                                                       |              |              |              |
| 1                                                       | -5.826439000 | 2.110029000  | -1.301240000 |                                                                       |              |              |              |
| 1                                                       | -6.213572000 | 0.611501000  | -2.179423000 |                                                                       |              |              |              |
| 1                                                       | -7.486744000 | 1.473920000  | -1.275069000 |                                                                       |              |              |              |
| 6                                                       | -7.031218000 | -0.885768000 | 0.000063000  |                                                                       |              |              |              |
| 1                                                       | -8.083907000 | -0.562071000 | 0.000184000  |                                                                       |              |              |              |
| 1                                                       | -6.878997000 | -1.513330000 | -0.892277000 |                                                                       |              |              |              |
| 1                                                       | -6.878896000 | -1.513435000 | 0.892317000  |                                                                       |              |              |              |
| D1-OCH <sub>3</sub><br>E(RB3LYP) = -859.864424848 a. u. |              |              |              | D1-OC <sub>2</sub> H <sub>5</sub><br>E(RB3LYP) = -899.184641823 a. u. |              |              |              |
| 6                                                       | 5.422864000  | -0.049373000 | -0.000169000 | 6                                                                     | 4.912108000  | -0.256222000 | -0.000069000 |
| 6                                                       | 4.993919000  | -1.388844000 | -0.000728000 | 6                                                                     | 4.446206000  | -1.583696000 | -0.000523000 |
| 6                                                       | 4.464994000  | 0.980710000  | 0.000552000  | 6                                                                     | 3.980570000  | 0.798666000  | 0.000520000  |
| 1                                                       | 4.768011000  | 2.027108000  | 0.001073000  | 1                                                                     | 4.310526000  | 1.836751000  | 0.000959000  |
| 1                                                       | 5.749872000  | -2.175663000 | -0.001316000 | 1                                                                     | 5.180690000  | -2.390600000 | -0.000978000 |
| 6                                                       | 3.108446000  | 0.666812000  | 0.000692000  | 6                                                                     | 2.616403000  | 0.520656000  | 0.000617000  |
| 6                                                       | 3.639794000  | -1.685500000 | -0.000566000 | 6                                                                     | 3.084792000  | -1.844685000 | -0.000398000 |
| 1                                                       | 2.387862000  | 1.486524000  | 0.001324000  | 1                                                                     | 1.917813000  | 1.359230000  | 0.001128000  |
| 1                                                       | 3.322765000  | -2.731570000 | -0.000984000 | 1                                                                     | 2.740362000  | -2.882088000 | -0.000738000 |
| 6                                                       | 2.655934000  | -0.668571000 | 0.000115000  | 6                                                                     | 2.128164000  | -0.802204000 | 0.000139000  |

|                                                        |              |              |              |                                                                         |              |              |              |
|--------------------------------------------------------|--------------|--------------|--------------|-------------------------------------------------------------------------|--------------|--------------|--------------|
| 6                                                      | 1.250311000  | -1.042245000 | 0.000207000  | 6                                                                       | 0.713292000  | -1.138141000 | 0.000183000  |
| 6                                                      | 0.164031000  | -0.219756000 | -0.000025000 | 6                                                                       | -0.350920000 | -0.287053000 | 0.000022000  |
| 6                                                      | -1.181839000 | -0.711048000 | 0.000144000  | 6                                                                       | -1.709160000 | -0.742498000 | 0.000114000  |
| 6                                                      | -2.299298000 | 0.078447000  | -0.000072000 | 6                                                                       | -2.805631000 | 0.076112000  | -0.000034000 |
| 6                                                      | -3.617152000 | -0.467750000 | 0.000116000  | 6                                                                       | -4.137194000 | -0.435328000 | 0.000070000  |
| 6                                                      | -4.792280000 | 0.239335000  | -0.000052000 | 6                                                                       | -5.293657000 | 0.302114000  | -0.000050000 |
| 6                                                      | -4.811179000 | 1.668808000  | -0.000453000 | 6                                                                       | -5.275376000 | 1.731575000  | -0.000302000 |
| 7                                                      | -4.786845000 | 2.834254000  | -0.000763000 | 7                                                                       | -5.220776000 | 2.896009000  | -0.000509000 |
| 6                                                      | -6.071343000 | -0.516273000 | 0.000197000  | 6                                                                       | -6.591799000 | -0.419923000 | 0.000092000  |
| 8                                                      | -6.157651000 | -1.727709000 | 0.000519000  | 8                                                                       | -6.709769000 | -1.628736000 | 0.000294000  |
| 8                                                      | -7.149056000 | 0.299041000  | -0.000019000 | 8                                                                       | -7.648099000 | 0.423085000  | -0.000060000 |
| 1                                                      | -7.927449000 | -0.286905000 | 0.000152000  | 1                                                                       | -8.441298000 | -0.142642000 | 0.000037000  |
| 1                                                      | 1.058842000  | -2.121983000 | 0.000442000  | 1                                                                       | 0.493075000  | -2.212411000 | 0.000325000  |
| 1                                                      | 0.292941000  | 0.867169000  | -0.000396000 | 1                                                                       | -0.193127000 | 0.796047000  | -0.000220000 |
| 1                                                      | -1.314220000 | -1.800009000 | 0.000473000  | 1                                                                       | -1.870256000 | -1.827599000 | 0.000320000  |
| 1                                                      | -2.190485000 | 1.167731000  | -0.000391000 | 1                                                                       | -2.668239000 | 1.162160000  | -0.000235000 |
| 1                                                      | -3.730471000 | -1.556444000 | 0.000427000  | 1                                                                       | -4.278908000 | -1.520697000 | 0.000265000  |
| 8                                                      | 6.766375000  | 0.141547000  | -0.000481000 | 8                                                                       | 6.258887000  | -0.101001000 | -0.000254000 |
| 6                                                      | 7.266152000  | 1.472902000  | 0.000435000  | 6                                                                       | 6.811567000  | 1.220531000  | 0.000186000  |
| 1                                                      | 6.946468000  | 2.027027000  | -0.899389000 | 1                                                                       | 6.462803000  | 1.768549000  | 0.894598000  |
| 1                                                      | 6.946500000  | 2.025749000  | 0.901068000  | 1                                                                       | 6.462494000  | 1.769282000  | -0.893655000 |
| 1                                                      | 8.359820000  | 1.382540000  | 0.000340000  | 6                                                                       | 8.321557000  | 1.080608000  | -0.000136000 |
|                                                        |              |              |              | 1                                                                       | 8.661282000  | 0.533531000  | -0.892912000 |
|                                                        |              |              |              | 1                                                                       | 8.661610000  | 0.532859000  | 0.892102000  |
|                                                        |              |              |              | 1                                                                       | 8.792926000  | 2.075710000  | 0.000151000  |
| D1-NH <sub>2</sub><br>E(RB3LYP) = -800.698145256 a. u. |              |              |              | D1-N(CH <sub>3</sub> ) <sub>2</sub><br>E(RB3LYP) = -879.309419441 a. u. |              |              |              |
| 6                                                      | -5.892602000 | 0.286076000  | -0.001512000 | 6                                                                       | 5.003777000  | 0.058963000  | -0.000227000 |
| 6                                                      | -5.501881000 | -1.069362000 | 0.000399000  | 6                                                                       | 4.562565000  | -1.290235000 | -0.000470000 |
| 6                                                      | -4.878896000 | 1.272298000  | -0.004657000 | 6                                                                       | 4.001865000  | 1.069347000  | 0.000236000  |
| 1                                                      | -5.159831000 | 2.328768000  | -0.008615000 | 1                                                                       | 4.283429000  | 2.121082000  | 0.000506000  |
| 1                                                      | -6.266452000 | -1.850570000 | 0.000825000  | 1                                                                       | 5.282969000  | -2.106518000 | -0.000775000 |
| 6                                                      | -3.540230000 | 0.915994000  | -0.005504000 | 6                                                                       | 2.655931000  | 0.744730000  | 0.000353000  |
| 6                                                      | -4.157456000 | -1.414197000 | -0.001036000 | 6                                                                       | 3.209342000  | -1.594659000 | -0.000323000 |
| 1                                                      | -2.789751000 | 1.708552000  | -0.005426000 | 1                                                                       | 1.929025000  | 1.559177000  | 0.000735000  |
| 1                                                      | -3.881015000 | -2.471906000 | 0.002527000  | 1                                                                       | 2.907740000  | -2.645684000 | -0.000511000 |
| 6                                                      | -3.134367000 | -0.439612000 | -0.003852000 | 6                                                                       | 2.209293000  | -0.597312000 | 0.000054000  |
| 6                                                      | -1.747424000 | -0.863999000 | -0.002965000 | 6                                                                       | 0.813443000  | -0.983475000 | 0.000152000  |
| 6                                                      | -0.628084000 | -0.083507000 | -0.004280000 | 6                                                                       | -0.285375000 | -0.172368000 | -0.000039000 |

|                                                          |              |              |              |                                                          |              |              |              |
|----------------------------------------------------------|--------------|--------------|--------------|----------------------------------------------------------|--------------|--------------|--------------|
| 6                                                        | 0.695271000  | -0.627146000 | -0.002687000 | 6                                                        | -1.621906000 | -0.679272000 | 0.000119000  |
| 6                                                        | 1.846523000  | 0.114908000  | -0.002507000 | 6                                                        | -2.754087000 | 0.093199000  | -0.000062000 |
| 6                                                        | 3.138242000  | -0.486638000 | -0.000433000 | 6                                                        | -4.060257000 | -0.473795000 | 0.000104000  |
| 6                                                        | 4.344995000  | 0.167688000  | 0.000815000  | 6                                                        | -5.250755000 | 0.211272000  | -0.000045000 |
| 6                                                        | 4.427238000  | 1.594663000  | 0.000379000  | 6                                                        | -5.296442000 | 1.639725000  | -0.000396000 |
| 7                                                        | 4.454437000  | 2.760188000  | 0.000165000  | 7                                                        | -5.293635000 | 2.805656000  | -0.000690000 |
| 6                                                        | 5.587883000  | -0.643369000 | 0.002935000  | 6                                                        | -6.513142000 | -0.567439000 | 0.000169000  |
| 8                                                        | 5.622002000  | -1.857894000 | 0.003854000  | 8                                                        | -6.579228000 | -1.780933000 | 0.000496000  |
| 8                                                        | 6.702164000  | 0.122636000  | 0.003788000  | 8                                                        | -7.608371000 | 0.226415000  | 0.000023000  |
| 1                                                        | 7.452058000  | -0.499227000 | 0.005047000  | 1                                                        | -8.372900000 | -0.377282000 | 0.000204000  |
| 1                                                        | -1.596011000 | -1.950301000 | -0.001064000 | 1                                                        | 0.632229000  | -2.065310000 | 0.000379000  |
| 1                                                        | -0.714875000 | 1.007571000  | -0.006523000 | 1                                                        | -0.168174000 | 0.915877000  | -0.000353000 |
| 1                                                        | 0.783571000  | -1.720727000 | -0.001286000 | 1                                                        | -1.739865000 | -1.770130000 | 0.000405000  |
| 1                                                        | 1.783679000  | 1.207804000  | -0.003809000 | 1                                                        | -2.662148000 | 1.184041000  | -0.000340000 |
| 1                                                        | 3.204075000  | -1.579294000 | 0.000354000  | 1                                                        | -4.154515000 | -1.564395000 | 0.000378000  |
| 7                                                        | -7.226929000 | 0.643964000  | -0.056441000 | 7                                                        | 6.342098000  | 0.378543000  | -0.000452000 |
| 1                                                        | -7.459113000 | 1.582048000  | 0.250745000  | 6                                                        | 7.343491000  | -0.673714000 | -0.000283000 |
| 1                                                        | -7.897484000 | -0.052502000 | 0.249445000  | 1                                                        | 7.263123000  | -1.320431000 | -0.892929000 |
|                                                          |              |              |              | 1                                                        | 8.342521000  | -0.220927000 | -0.000448000 |
|                                                          |              |              |              | 1                                                        | 7.263205000  | -1.320211000 | 0.892557000  |
|                                                          |              |              |              | 6                                                        | 6.763933000  | 1.768942000  | 0.000781000  |
|                                                          |              |              |              | 1                                                        | 7.859911000  | 1.812571000  | 0.000689000  |
|                                                          |              |              |              | 1                                                        | 6.402396000  | 2.311502000  | -0.891498000 |
|                                                          |              |              |              | 1                                                        | 6.402562000  | 2.309957000  | 0.894106000  |
| D1-PhCH <sub>3</sub><br>E(RB3LYP) = -1015.72383802 a. u. |              |              |              | D1-PhNH <sub>2</sub><br>E(RB3LYP) = -1031.76723247 a. u. |              |              |              |
| 6                                                        | -3.549888000 | -0.282080000 | 0.035942000  | 6                                                        | 3.561835000  | -0.279931000 | -0.037216000 |
| 6                                                        | -3.060090000 | -1.594675000 | 0.177110000  | 6                                                        | 3.067049000  | -1.593170000 | -0.171453000 |
| 6                                                        | -2.601615000 | 0.757767000  | -0.075954000 | 6                                                        | 2.610709000  | 0.760309000  | 0.068256000  |
| 1                                                        | -2.946094000 | 1.784369000  | -0.213877000 | 1                                                        | 2.953393000  | 1.787938000  | 0.202594000  |
| 1                                                        | -3.762094000 | -2.422475000 | 0.293381000  | 1                                                        | 3.766305000  | -2.423432000 | -0.286118000 |
| 6                                                        | -1.237001000 | 0.501852000  | -0.048322000 | 6                                                        | 1.246615000  | 0.505775000  | 0.040471000  |
| 6                                                        | -1.693310000 | -1.852850000 | 0.205253000  | 6                                                        | 1.700772000  | -1.850220000 | -0.196724000 |
| 1                                                        | -0.542265000 | 1.337631000  | -0.148353000 | 1                                                        | 0.552868000  | 1.343146000  | 0.135036000  |
| 1                                                        | -1.343751000 | -2.881566000 | 0.325871000  | 1                                                        | 1.350801000  | -2.879607000 | -0.311395000 |
| 6                                                        | -0.744448000 | -0.814606000 | 0.093696000  | 6                                                        | 0.751207000  | -0.811152000 | -0.092587000 |
| 6                                                        | 0.673430000  | -1.144654000 | 0.129160000  | 6                                                        | -0.665238000 | -1.139395000 | -0.126058000 |
| 6                                                        | 1.730213000  | -0.291468000 | 0.033042000  | 6                                                        | -1.723120000 | -0.285414000 | -0.033874000 |
| 6                                                        | 3.093415000  | -0.734070000 | 0.080371000  | 6                                                        | -3.084897000 | -0.728731000 | -0.078415000 |

|   |              |              |              |   |              |              |              |
|---|--------------|--------------|--------------|---|--------------|--------------|--------------|
| 6 | 4.180579000  | 0.089859000  | -0.013118000 | 6 | -4.174596000 | 0.093676000  | 0.012059000  |
| 6 | 5.518572000  | -0.405577000 | 0.040247000  | 6 | -5.510413000 | -0.404897000 | -0.038379000 |
| 6 | 6.665455000  | 0.339987000  | -0.044450000 | 6 | -6.660698000 | 0.337197000  | 0.044028000  |
| 6 | 6.631554000  | 1.760569000  | -0.202571000 | 6 | -6.631556000 | 1.758334000  | 0.196616000  |
| 7 | 6.565099000  | 2.917117000  | -0.331284000 | 7 | -6.568921000 | 2.915683000  | 0.320825000  |
| 6 | 7.972914000  | -0.363683000 | 0.032030000  | 6 | -7.964843000 | -0.370904000 | -0.028893000 |
| 8 | 8.103018000  | -1.563438000 | 0.165472000  | 8 | -8.092110000 | -1.571814000 | -0.157478000 |
| 8 | 9.018337000  | 0.486202000  | -0.064127000 | 8 | -9.014138000 | 0.475433000  | 0.064389000  |
| 1 | 9.819221000  | -0.065439000 | -0.003860000 | 1 | -9.812067000 | -0.080624000 | 0.006552000  |
| 1 | 0.898499000  | -2.211218000 | 0.247214000  | 1 | -0.891443000 | -2.206450000 | -0.238533000 |
| 1 | 1.563928000  | 0.783616000  | -0.086447000 | 1 | -1.556725000 | 0.790236000  | 0.080256000  |
| 1 | 3.263785000  | -1.810949000 | 0.200290000  | 1 | -3.254233000 | -1.806399000 | -0.193472000 |
| 1 | 4.032470000  | 1.167827000  | -0.133220000 | 1 | -4.028538000 | 1.172438000  | 0.127415000  |
| 1 | 5.671759000  | -1.482683000 | 0.160065000  | 1 | -5.660583000 | -1.482948000 | -0.153769000 |
| 6 | -7.276455000 | -0.631112000 | -0.627431000 | 6 | 7.295123000  | -0.658804000 | 0.583411000  |
| 6 | -7.805286000 | 0.536629000  | -0.052444000 | 6 | 7.816629000  | 0.537636000  | 0.052263000  |
| 6 | -6.907031000 | 1.428036000  | 0.550467000  | 6 | 6.911060000  | 1.460161000  | -0.508703000 |
| 6 | -5.909435000 | -0.897176000 | -0.598857000 | 6 | 5.928958000  | -0.917211000 | 0.548842000  |
| 6 | -5.535688000 | 1.168353000  | 0.578909000  | 6 | 5.546261000  | 1.193916000  | -0.532126000 |
| 6 | -5.005619000 | -0.001147000 | 0.005646000  | 6 | 5.014036000  | -0.000879000 | -0.007241000 |
| 1 | -7.948929000 | -1.342466000 | -1.115051000 | 1 | 7.973320000  | -1.388280000 | 1.034444000  |
| 1 | -4.870715000 | 1.874390000  | 1.080748000  | 1 | 4.879729000  | 1.923389000  | -0.996829000 |
| 1 | -7.287371000 | 2.341722000  | 1.014848000  | 1 | 7.289362000  | 2.390343000  | -0.941230000 |
| 1 | -5.532009000 | -1.802292000 | -1.079446000 | 1 | 5.560765000  | -1.842939000 | 0.995933000  |
| 6 | -9.288658000 | 0.811692000  | -0.087689000 | 7 | 9.187150000  | 0.772838000  | 0.025971000  |
| 1 | -9.664343000 | 0.846192000  | -1.124196000 | 1 | 9.729153000  | 0.268037000  | 0.720105000  |
| 1 | -9.854667000 | 0.020577000  | 0.432659000  | 1 | 9.460896000  | 1.748778000  | -0.029518000 |
| 1 | -9.533615000 | 1.770970000  | 0.391371000  |   |              |              |              |

**Table S10.** Cartesian coordinates (in Angstrom unit) of B3LYP/cc-pVDZ optimized geometries of pyrene based D- $\pi$ -A systems.

| D2<br>E(RB3LYP) = -1128.88061603 a. u. |             |              |             | D2-CH <sub>3</sub><br>E(RB3LYP) = -1168.19847043 a. u. |             |              |              |
|----------------------------------------|-------------|--------------|-------------|--------------------------------------------------------|-------------|--------------|--------------|
| 6                                      | 5.631431000 | -0.482809000 | 0.000042000 | 6                                                      | 6.028999000 | -0.442115000 | 0.000408000  |
| 6                                      | 6.794548000 | 0.241238000  | 0.000050000 | 6                                                      | 7.182210000 | 0.298062000  | 0.000255000  |
| 6                                      | 6.792874000 | 1.671097000  | 0.000047000 | 6                                                      | 7.160963000 | 1.727725000  | 0.000303000  |
| 7                                      | 6.753355000 | 2.835964000  | 0.000067000 | 7                                                      | 7.104949000 | 2.891941000  | 0.000299000  |
| 6                                      | 8.086100000 | -0.496085000 | 0.000066000 | 6                                                      | 8.483597000 | -0.421287000 | -0.000064000 |

|   |              |              |              |   |              |              |              |
|---|--------------|--------------|--------------|---|--------------|--------------|--------------|
| 8 | 8.188399000  | -1.705762000 | -0.000094000 | 8 | 8.602905000  | -1.629490000 | -0.000203000 |
| 8 | 9.150128000  | 0.335591000  | -0.000116000 | 8 | 9.536326000  | 0.424859000  | -0.000322000 |
| 1 | 9.938765000  | -0.236697000 | -0.000238000 | 1 | 10.332479000 | -0.136843000 | -0.000558000 |
| 6 | 1.846208000  | -0.278144000 | 0.000027000  | 6 | 2.241320000  | -0.292033000 | 0.000563000  |
| 1 | 1.707212000  | 0.807262000  | 0.000026000  | 1 | 2.086150000  | 0.791219000  | 0.001024000  |
| 1 | 5.759735000  | -1.569731000 | 0.000042000  | 1 | 6.172453000  | -1.527179000 | 0.000298000  |
| 6 | 3.199068000  | -0.756705000 | 0.000034000  | 6 | 3.600778000  | -0.750648000 | 0.000607000  |
| 6 | 4.304796000  | 0.046504000  | 0.000039000  | 6 | 4.695225000  | 0.068326000  | 0.000595000  |
| 1 | 3.343169000  | -1.843955000 | 0.000034000  | 1 | 3.760674000  | -1.835744000 | 0.000581000  |
| 1 | 4.182140000  | 1.134273000  | 0.000039000  | 1 | 4.557084000  | 1.154265000  | 0.000740000  |
| 6 | 0.769783000  | -1.109983000 | 0.000022000  | 6 | 1.177123000  | -1.139972000 | -0.000128000 |
| 1 | 0.967885000  | -2.188064000 | 0.000021000  | 1 | 1.391716000  | -2.214976000 | -0.000500000 |
| 6 | -2.922325000 | 2.275872000  | 0.000047000  | 6 | -3.543471000 | -2.646471000 | -0.000101000 |
| 6 | -2.451847000 | 0.912872000  | 0.000027000  | 6 | -2.565824000 | -1.589029000 | -0.000116000 |
| 6 | -4.254262000 | 2.564971000  | 0.000038000  | 6 | -4.880664000 | -2.374341000 | -0.000203000 |
| 6 | -3.419803000 | -0.142496000 | -0.000002000 | 6 | -3.024977000 | -0.235576000 | -0.000274000 |
| 6 | -5.249521000 | 1.523235000  | 0.000009000  | 6 | -5.370337000 | -1.020705000 | -0.000156000 |
| 6 | -4.813329000 | 0.160848000  | -0.000011000 | 6 | -4.421658000 | 0.046591000  | -0.000227000 |
| 1 | -2.182371000 | 3.079899000  | 0.000069000  | 1 | -3.190484000 | -3.680678000 | -0.000045000 |
| 6 | -1.088668000 | 0.595172000  | 0.000035000  | 6 | -1.185719000 | -1.838530000 | -0.000094000 |
| 6 | -2.979875000 | -1.502426000 | -0.000021000 | 6 | -2.073520000 | 0.834683000  | -0.000493000 |
| 6 | -5.775770000 | -0.897442000 | -0.000039000 | 6 | -4.883047000 | 1.400119000  | -0.000361000 |
| 6 | -1.603917000 | -1.772518000 | -0.000011000 | 6 | -0.706302000 | 0.537545000  | -0.000671000 |
| 6 | -0.642877000 | -0.742768000 | 0.000016000  | 6 | -0.240506000 | -0.794393000 | -0.000310000 |
| 1 | -0.365969000 | 1.413183000  | 0.000059000  | 1 | -0.835504000 | -2.874327000 | 0.000068000  |
| 6 | -3.971107000 | -2.547360000 | -0.000049000 | 6 | -2.567339000 | 2.190229000  | -0.000647000 |
| 1 | -1.269659000 | -2.813474000 | -0.000025000 | 1 | 0.004619000  | 1.365941000  | -0.000767000 |
| 6 | -6.627889000 | 1.796990000  | -0.000001000 | 6 | -6.743490000 | -0.714369000 | -0.000168000 |
| 6 | -7.144523000 | -0.573580000 | -0.000048000 | 6 | -6.263107000 | 1.649780000  | -0.000335000 |
| 6 | -7.561917000 | 0.758235000  | -0.000029000 | 6 | -7.203601000 | 0.607136000  | -0.000111000 |
| 1 | -4.592404000 | 3.604141000  | 0.000053000  | 1 | -5.608437000 | -3.189646000 | -0.000273000 |
| 6 | -5.303864000 | -2.257474000 | -0.000058000 | 6 | -3.903624000 | 2.458262000  | -0.000655000 |
| 1 | -3.631385000 | -3.585930000 | -0.000064000 | 1 | -1.840657000 | 3.006380000  | -0.000800000 |
| 1 | -7.882280000 | -1.379564000 | -0.000070000 | 1 | -6.610455000 | 2.687096000  | -0.000616000 |
| 1 | -8.629054000 | 0.990739000  | -0.000036000 | 1 | -4.257673000 | 3.492194000  | -0.000828000 |
| 1 | -6.042950000 | -3.062449000 | -0.000080000 | 1 | -7.465589000 | -1.535547000 | -0.000326000 |
| 1 | -6.964432000 | 2.836519000  | 0.000014000  | 6 | -8.681279000 | 0.918736000  | 0.001740000  |
|   |              |              |              | 1 | -8.964935000 | 1.497236000  | 0.896956000  |
|   |              |              |              | 1 | -8.961664000 | 1.525473000  | -0.875419000 |
|   |              |              |              | 1 | -9.288742000 | 0.002245000  | -0.013562000 |

| D2-C <sub>5</sub> H <sub>11</sub><br>E(RB3LYP) = -1325.45460791 a. u. |              |              |              | D2-isopropyl<br>E(RB3LYP) = -1246.82605409 a. u. |               |              |              |
|-----------------------------------------------------------------------|--------------|--------------|--------------|--------------------------------------------------|---------------|--------------|--------------|
| 6                                                                     | 7.725450000  | -0.485844000 | -0.000177000 | 6                                                | -6.760441000  | 0.341859000  | -0.000072000 |
| 6                                                                     | 8.888181000  | 0.239443000  | -0.000077000 | 6                                                | -7.887607000  | -0.437430000 | 0.000198000  |
| 6                                                                     | 8.885324000  | 1.669247000  | 0.000130000  | 6                                                | -7.817260000  | -1.865522000 | 0.000638000  |
| 7                                                                     | 8.844256000  | 2.834094000  | 0.000295000  | 7                                                | -7.721168000  | -3.027117000 | 0.000999000  |
| 6                                                                     | 10.180060000 | -0.496581000 | -0.000189000 | 6                                                | -9.212862000  | 0.236849000  | 0.000021000  |
| 8                                                                     | 10.283934000 | -1.706248000 | -0.000355000 | 8                                                | -9.373577000  | 1.440250000  | -0.000352000 |
| 8                                                                     | 11.243739000 | 0.335882000  | -0.000063000 | 8                                                | -10.235976000 | -0.644912000 | 0.000317000  |
| 1                                                                     | 12.032434000 | -0.236234000 | -0.000141000 | 1                                                | -11.050898000 | -0.110801000 | 0.000169000  |
| 6                                                                     | 3.939976000  | -0.289062000 | -0.000148000 | 6                                                | -2.969842000  | 0.322267000  | -0.000160000 |
| 1                                                                     | 3.797642000  | 0.795933000  | 0.000034000  | 1                                                | -2.777305000  | -0.754957000 | 0.000194000  |
| 1                                                                     | 7.855061000  | -1.572658000 | -0.000336000 | 1                                                | -6.941046000  | 1.421366000  | -0.000404000 |
| 6                                                                     | 5.293754000  | -0.763963000 | -0.000218000 | 6                                                | -4.344348000  | 0.733654000  | -0.000254000 |
| 6                                                                     | 6.398339000  | 0.041389000  | -0.000096000 | 6                                                | -5.409948000  | -0.122496000 | 0.000041000  |
| 1                                                                     | 5.440388000  | -1.850947000 | -0.000383000 | 1                                                | -4.541536000  | 1.812601000  | -0.000590000 |
| 1                                                                     | 6.273787000  | 1.128972000  | 0.000068000  | 1                                                | -5.234575000  | -1.203049000 | 0.000373000  |
| 6                                                                     | 2.865821000  | -1.124460000 | -0.000281000 | 6                                                | -1.935665000  | 1.206547000  | -0.000449000 |
| 1                                                                     | 3.067867000  | -2.201888000 | -0.000422000 | 1                                                | -2.187347000  | 2.273463000  | -0.000718000 |
| 6                                                                     | -1.872047000 | -2.576591000 | 0.000173000  | 6                                                | 2.729572000   | 2.877363000  | 0.000349000  |
| 6                                                                     | -0.881923000 | -1.531109000 | 0.000002000  | 6                                                | 1.789298000   | 1.786329000  | 0.000017000  |
| 6                                                                     | -3.206078000 | -2.288125000 | 0.000247000  | 6                                                | 4.075408000   | 2.652166000  | 0.000462000  |
| 6                                                                     | -1.325297000 | -0.172552000 | -0.000089000 | 6                                                | 2.295289000   | 0.449741000  | -0.000184000 |
| 6                                                                     | -3.679963000 | -0.928984000 | 0.000155000  | 6                                                | 4.611946000   | 1.316267000  | 0.000241000  |
| 6                                                                     | -2.718538000 | 0.125292000  | -0.000015000 | 6                                                | 3.700987000   | 0.216663000  | -0.000067000 |
| 1                                                                     | -1.531685000 | -3.615022000 | 0.000243000  | 1                                                | 2.340574000   | 3.898581000  | 0.000505000  |
| 6                                                                     | 0.495532000  | -1.796261000 | -0.000080000 | 6                                                | 0.401340000   | 1.987344000  | -0.000107000 |
| 6                                                                     | -0.362021000 | 0.887150000  | -0.000265000 | 6                                                | 1.382158000   | -0.653329000 | -0.000524000 |
| 6                                                                     | -3.165366000 | 1.483614000  | -0.000115000 | 6                                                | 4.210221000   | -1.119005000 | -0.000293000 |
| 6                                                                     | 1.001564000  | 0.574653000  | -0.000334000 | 6                                                | 0.005231000   | -0.404245000 | -0.000624000 |
| 6                                                                     | 1.452265000  | -0.762809000 | -0.000232000 | 6                                                | -0.506764000  | 0.910555000  | -0.000393000 |
| 1                                                                     | 0.833995000  | -2.835939000 | -0.000012000 | 1                                                | 0.015118000   | 3.010229000  | 0.000049000  |
| 6                                                                     | -0.841146000 | 2.248343000  | -0.000369000 | 6                                                | 1.923610000   | -1.990497000 | -0.000762000 |
| 1                                                                     | 1.721914000  | 1.394833000  | -0.000495000 | 1                                                | -0.676290000  | -1.256951000 | -0.000935000 |
| 6                                                                     | -5.051638000 | -0.609875000 | 0.000226000  | 6                                                | 5.994324000   | 1.056540000  | 0.000347000  |
| 6                                                                     | -4.541865000 | 1.746009000  | -0.000038000 | 6                                                | 5.598775000   | -1.321360000 | -0.000184000 |
| 6                                                                     | -5.498754000 | 0.716032000  | 0.000134000  | 6                                                | 6.503984000   | -0.247553000 | 0.000145000  |
| 1                                                                     | -3.943398000 | -3.094884000 | 0.000377000  | 1                                                | 4.774262000   | 3.492405000  | 0.000722000  |
| 6                                                                     | -2.174248000 | 2.531267000  | -0.000295000 | 6                                                | 3.268678000   | -2.210923000 | -0.000651000 |
| 1                                                                     | -0.105396000 | 3.056349000  | -0.000506000 | 1                                                | 1.226355000   | -2.831921000 | -0.001038000 |

|                                              |               |              |              |                                           |               |              |              |
|----------------------------------------------|---------------|--------------|--------------|-------------------------------------------|---------------|--------------|--------------|
| 1                                            | -4.878029000  | 2.787292000  | -0.000115000 | 1                                         | 5.972204000   | -2.348561000 | -0.000330000 |
| 1                                            | -2.516815000  | 3.569081000  | -0.000373000 | 1                                         | 3.658935000   | -3.231781000 | -0.000842000 |
| 1                                            | -5.769975000  | -1.431220000 | 0.000356000  | 1                                         | 6.687225000   | 1.902858000  | 0.000580000  |
| 6                                            | -6.971844000  | 1.090541000  | 0.000215000  | 6                                         | 8.009280000   | -0.486958000 | 0.000288000  |
| 1                                            | -7.161579000  | 1.736083000  | -0.877315000 | 1                                         | 8.489117000   | 0.507136000  | 0.000330000  |
| 1                                            | -7.161475000  | 1.736116000  | 0.877745000  | 6                                         | 8.472543000   | -1.222998000 | -1.269558000 |
| 6                                            | -7.983580000  | -0.057892000 | 0.000298000  | 6                                         | 8.472235000   | -1.222897000 | 1.270341000  |
| 1                                            | -7.817893000  | -0.700510000 | -0.883456000 | 1                                         | 8.171638000   | -0.679834000 | 2.180222000  |
| 1                                            | -7.817820000  | -0.700451000 | 0.884082000  | 1                                         | 8.042479000   | -2.236976000 | 1.327436000  |
| 6                                            | -9.436035000  | 0.431333000  | 0.000345000  | 1                                         | 9.569766000   | -1.326505000 | 1.279746000  |
| 1                                            | -9.604821000  | 1.076967000  | -0.882252000 | 1                                         | 8.042854000   | -2.237107000 | -1.326673000 |
| 1                                            | -9.604742000  | 1.077030000  | 0.882911000  | 1                                         | 9.570077000   | -1.326592000 | -1.278765000 |
| 6                                            | -10.465189000 | -0.703873000 | 0.000431000  | 1                                         | 8.172136000   | -0.680074000 | -2.179592000 |
| 1                                            | -10.295263000 | -1.348332000 | -0.881856000 |                                           |               |              |              |
| 1                                            | -10.295186000 | -1.348268000 | 0.882751000  |                                           |               |              |              |
| 6                                            | -11.913006000 | -0.208185000 | 0.000477000  |                                           |               |              |              |
| 1                                            | -12.124616000 | 0.410021000  | -0.888656000 |                                           |               |              |              |
| 1                                            | -12.124538000 | 0.410086000  | 0.889582000  |                                           |               |              |              |
| 1                                            | -12.627406000 | -1.047019000 | 0.000539000  |                                           |               |              |              |
| D2-t-but<br>E(RB3LYP) = -1286.13661914 a. u. |               |              |              | D2-OH<br>E(RB3LYP) = -1204.10771937 a. u. |               |              |              |
| 6                                            | 7.088336000   | -0.360998000 | -0.000016000 | 6                                         | -6.016413000  | -0.445604000 | 0.000043000  |
| 6                                            | 8.219790000   | 0.412094000  | 0.000154000  | 6                                         | -7.170803000  | 0.293087000  | -0.000059000 |
| 6                                            | 8.157313000   | 1.840548000  | 0.000374000  | 6                                         | -7.151227000  | 1.722740000  | -0.000242000 |
| 7                                            | 8.067694000   | 3.002664000  | 0.000550000  | 7                                         | -7.096240000  | 2.887029000  | -0.000393000 |
| 6                                            | 9.541298000   | -0.269439000 | 0.000107000  | 6                                         | -8.471055000  | -0.427847000 | 0.000028000  |
| 8                                            | 9.695450000   | -1.473709000 | -0.000075000 | 8                                         | -8.589021000  | -1.636241000 | 0.000167000  |
| 8                                            | 10.569266000  | 0.606684000  | 0.000295000  | 8                                         | -9.525063000  | 0.416896000  | -0.000107000 |
| 1                                            | 11.381210000  | 0.068062000  | 0.000249000  | 1                                         | -10.320291000 | -0.146100000 | -0.000052000 |
| 6                                            | 3.297927000   | -0.320603000 | -0.000148000 | 6                                         | -2.229158000  | -0.290962000 | 0.000054000  |
| 1                                            | 3.111361000   | 0.757665000  | 0.000016000  | 1                                         | -2.075493000  | 0.792524000  | -0.000098000 |
| 1                                            | 7.263025000   | -1.441478000 | -0.000177000 | 1                                         | -6.158539000  | -1.530853000 | 0.000183000  |
| 6                                            | 4.670118000   | -0.739559000 | -0.000168000 | 6                                         | -3.587773000  | -0.751140000 | 0.000103000  |
| 6                                            | 5.740432000   | 0.110729000  | 0.000002000  | 6                                         | -4.683519000  | 0.066418000  | -0.000014000 |
| 1                                            | 4.861375000   | -1.819576000 | -0.000326000 | 1                                         | -3.746331000  | -1.836451000 | 0.000245000  |
| 1                                            | 5.570975000   | 1.192227000  | 0.000161000  | 1                                         | -4.546753000  | 1.152540000  | -0.000156000 |
| 6                                            | 2.258822000   | -1.199127000 | -0.000297000 | 6                                         | -1.163510000  | -1.137485000 | 0.000172000  |
| 1                                            | 2.504550000   | -2.267431000 | -0.000414000 | 1                                         | -1.376824000  | -2.212751000 | 0.000291000  |
| 6                                            | -2.417290000  | -2.842143000 | 0.000133000  | 6                                         | 3.558813000   | -2.640515000 | -0.000136000 |

|                                                         |              |              |              |                                                                       |             |              |              |
|---------------------------------------------------------|--------------|--------------|--------------|-----------------------------------------------------------------------|-------------|--------------|--------------|
| 6                                                       | -1.469256000 | -1.757924000 | -0.000069000 | 6                                                                     | 2.580046000 | -1.583233000 | -0.000018000 |
| 6                                                       | -3.761802000 | -2.607227000 | 0.000223000  | 6                                                                     | 4.895399000 | -2.370375000 | -0.000186000 |
| 6                                                       | -1.966544000 | -0.418393000 | -0.000203000 | 6                                                                     | 3.039982000 | -0.229701000 | 0.000046000  |
| 6                                                       | -4.289311000 | -1.267679000 | 0.000083000  | 6                                                                     | 5.387456000 | -1.015680000 | -0.000121000 |
| 6                                                       | -3.370483000 | -0.177400000 | -0.000139000 | 6                                                                     | 4.435377000 | 0.053300000  | -0.000002000 |
| 1                                                       | -2.035805000 | -3.866184000 | 0.000203000  | 1                                                                     | 3.205931000 | -3.674809000 | -0.000186000 |
| 6                                                       | -0.082233000 | -1.966935000 | -0.000121000 | 6                                                                     | 1.201368000 | -1.833731000 | 0.000038000  |
| 6                                                       | -1.047908000 | 0.679890000  | -0.000395000 | 6                                                                     | 2.086370000 | 0.838682000  | 0.000168000  |
| 6                                                       | -3.873986000 | 1.159291000  | -0.000278000 | 6                                                                     | 4.894566000 | 1.407000000  | 0.000069000  |
| 6                                                       | 0.327356000  | 0.423008000  | -0.000433000 | 6                                                                     | 0.718897000 | 0.540626000  | 0.000214000  |
| 6                                                       | 0.831612000  | -0.895148000 | -0.000287000 | 6                                                                     | 0.253319000 | -0.790680000 | 0.000142000  |
| 1                                                       | 0.298374000  | -2.991923000 | -0.000020000 | 1                                                                     | 0.852607000 | -2.870051000 | -0.000009000 |
| 6                                                       | -1.583302000 | 2.020017000  | -0.000547000 | 6                                                                     | 2.578447000 | 2.193489000  | 0.000243000  |
| 1                                                       | 1.014006000  | 1.271583000  | -0.000598000 | 1                                                                     | 0.007914000 | 1.369008000  | 0.000328000  |
| 6                                                       | -5.672322000 | -1.003307000 | 0.000157000  | 6                                                                     | 6.757508000 | -0.719507000 | -0.000168000 |
| 6                                                       | -5.260562000 | 1.366429000  | -0.000196000 | 6                                                                     | 6.274555000 | 1.663508000  | 0.000018000  |
| 6                                                       | -6.181468000 | 0.302106000  | 0.000022000  | 6                                                                     | 7.196891000 | 0.609683000  | -0.000100000 |
| 1                                                       | -4.466157000 | -3.442951000 | 0.000370000  | 1                                                                     | 5.622679000 | -3.185773000 | -0.000277000 |
| 6                                                       | -2.927185000 | 2.247240000  | -0.000506000 | 6                                                                     | 3.914773000 | 2.463726000  | 0.000194000  |
| 1                                                       | -0.881917000 | 2.858010000  | -0.000680000 | 1                                                                     | 1.851659000 | 3.009566000  | 0.000339000  |
| 1                                                       | -5.620861000 | 2.397499000  | -0.000252000 | 1                                                                     | 6.628858000 | 2.699059000  | 0.000071000  |
| 1                                                       | -3.312211000 | 3.270119000  | -0.000634000 | 1                                                                     | 4.266323000 | 3.498486000  | 0.000250000  |
| 1                                                       | -6.348673000 | -1.858132000 | 0.000313000  | 1                                                                     | 7.501456000 | -1.518206000 | -0.000257000 |
| 6                                                       | -7.693391000 | 0.603552000  | 0.000249000  | 8                                                                     | 8.544356000 | 0.816825000  | -0.000153000 |
| 6                                                       | -8.053038000 | 1.421577000  | -1.261919000 | 1                                                                     | 8.716453000 | 1.769972000  | -0.000089000 |
| 1                                                       | -7.510186000 | 2.378484000  | -1.301386000 |                                                                       |             |              |              |
| 1                                                       | -7.811181000 | 0.860193000  | -2.178699000 |                                                                       |             |              |              |
| 1                                                       | -9.131790000 | 1.649459000  | -1.275349000 |                                                                       |             |              |              |
| 6                                                       | -8.545784000 | -0.678397000 | 0.000213000  |                                                                       |             |              |              |
| 1                                                       | -8.359628000 | -1.296810000 | -0.892035000 |                                                                       |             |              |              |
| 1                                                       | -8.359821000 | -1.296771000 | 0.892522000  |                                                                       |             |              |              |
| 1                                                       | -9.614427000 | -0.412181000 | 0.000109000  |                                                                       |             |              |              |
| 6                                                       | -8.052561000 | 1.421258000  | 1.262793000  |                                                                       |             |              |              |
| 1                                                       | -9.131274000 | 1.649316000  | 1.276629000  |                                                                       |             |              |              |
| 1                                                       | -7.810499000 | 0.859556000  | 2.179319000  |                                                                       |             |              |              |
| 1                                                       | -7.509496000 | 2.378042000  | 1.302334000  |                                                                       |             |              |              |
| D2-OCH <sub>3</sub><br>E(RB3LYP) = -1243.40889665 a. u. |              |              |              | D2-OC <sub>2</sub> H <sub>5</sub><br>E(RB3LYP) = -1282.72902623 a. u. |             |              |              |
| 6                                                       | 6.399672000  | -0.371656000 | 0.000069000  | 6                                                                     | 6.813958000 | -0.307504000 | 0.000008000  |



|   |              |              |              |   |              |              |              |
|---|--------------|--------------|--------------|---|--------------|--------------|--------------|
| 6 | 7.535746000  | 0.395084000  | -0.000067000 | 6 | 7.936277000  | 0.479325000  | -0.000090000 |
| 6 | 7.481230000  | 1.823814000  | -0.000200000 | 6 | 7.856361000  | 1.906851000  | -0.000236000 |
| 7 | 7.397908000  | 2.986429000  | -0.000305000 | 7 | 7.752407000  | 3.067809000  | -0.000357000 |
| 6 | 8.853120000  | -0.293782000 | -0.000077000 | 6 | 9.265622000  | -0.185982000 | -0.000041000 |
| 8 | 9.000803000  | -1.498950000 | 0.000038000  | 8 | 9.434819000  | -1.388342000 | 0.000072000  |
| 8 | 9.886293000  | 0.576447000  | -0.000211000 | 8 | 10.283235000 | 0.702462000  | -0.000158000 |
| 1 | 10.694896000 | 0.032851000  | -0.000199000 | 1 | 11.101295000 | 0.173214000  | -0.000123000 |
| 6 | 2.609833000  | -0.311384000 | 0.000178000  | 6 | 3.023689000  | -0.315715000 | 0.000061000  |
| 1 | 2.428732000  | 0.767850000  | 0.000129000  | 1 | 2.822785000  | 0.760009000  | -0.000054000 |
| 1 | 6.568414000  | -1.453092000 | 0.000162000  | 1 | 7.001953000  | -1.385763000 | 0.000118000  |
| 6 | 3.979456000  | -0.737247000 | 0.000201000  | 6 | 4.400785000  | -0.716515000 | 0.000085000  |
| 6 | 5.054673000  | 0.107295000  | 0.000082000  | 6 | 5.460662000  | 0.147280000  | -0.000020000 |
| 1 | 4.165111000  | -1.818265000 | 0.000318000  | 1 | 4.606004000  | -1.794000000 | 0.000195000  |
| 1 | 4.891028000  | 1.189690000  | -0.000009000 | 1 | 5.277598000  | 1.226557000  | -0.000128000 |
| 6 | 1.565914000  | -1.184709000 | 0.000176000  | 6 | 1.995979000  | -1.208145000 | 0.000160000  |
| 1 | 1.806723000  | -2.254173000 | 0.000178000  | 1 | 2.256611000  | -2.272966000 | 0.000245000  |
| 6 | -3.115866000 | -2.810960000 | -0.000108000 | 6 | -2.654502000 | -2.921651000 | -0.000107000 |
| 6 | -2.164250000 | -1.727969000 | 0.000016000  | 6 | -1.723251000 | -1.821090000 | 0.000002000  |
| 6 | -4.458570000 | -2.576056000 | -0.000179000 | 6 | -4.001371000 | -2.711794000 | -0.000141000 |
| 6 | -2.659058000 | -0.386625000 | 0.000066000  | 6 | -2.243081000 | -0.489208000 | 0.000084000  |
| 6 | -4.985653000 | -1.233703000 | -0.000121000 | 6 | -4.553435000 | -1.379510000 | -0.000089000 |
| 6 | -4.061293000 | -0.139836000 | 0.000005000  | 6 | -3.649622000 | -0.268752000 | 0.000044000  |
| 1 | -2.735707000 | -3.835564000 | -0.000138000 | 1 | -2.255278000 | -3.938986000 | -0.000163000 |
| 6 | -0.780159000 | -1.942427000 | 0.000062000  | 6 | -0.335403000 | -2.009582000 | 0.000043000  |
| 6 | -1.734128000 | 0.706446000  | 0.000179000  | 6 | -1.338783000 | 0.621046000  | 0.000222000  |
| 6 | -4.557369000 | 1.198516000  | 0.000062000  | 6 | -4.170997000 | 1.059938000  | 0.000198000  |
| 6 | -0.358750000 | 0.443948000  | 0.000206000  | 6 | 0.041245000  | 0.384350000  | 0.000244000  |
| 6 | 0.140738000  | -0.874387000 | 0.000158000  | 6 | 0.565335000  | -0.924453000 | 0.000147000  |
| 1 | -0.404166000 | -2.969183000 | 0.000003000  | 1 | 0.059762000  | -3.029117000 | -0.000015000 |
| 6 | -2.262232000 | 2.047032000  | 0.000236000  | 6 | -1.892060000 | 1.951483000  | 0.000330000  |
| 1 | 0.330472000  | 1.290536000  | 0.000320000  | 1 | 0.714518000  | 1.243687000  | 0.000364000  |
| 6 | -6.359303000 | -0.969891000 | -0.000181000 | 6 | -5.931686000 | -1.141035000 | -0.000121000 |
| 6 | -5.945627000 | 1.427404000  | -0.000003000 | 6 | -5.563172000 | 1.263105000  | 0.000156000  |
| 6 | -6.840295000 | 0.349108000  | -0.000123000 | 6 | -6.438756000 | 0.168514000  | -0.000106000 |
| 1 | -5.164690000 | -3.409881000 | -0.000286000 | 1 | -4.691812000 | -3.558671000 | -0.000217000 |
| 6 | -3.605998000 | 2.280505000  | 0.000182000  | 6 | -3.239983000 | 2.159599000  | 0.000319000  |
| 1 | -1.557985000 | 2.882640000  | 0.000345000  | 1 | -1.203653000 | 2.800194000  | 0.000438000  |
| 1 | -6.305039000 | 2.456139000  | 0.000039000  | 1 | -5.940933000 | 2.285136000  | 0.000387000  |
| 1 | -3.985281000 | 3.305483000  | 0.000233000  | 1 | -3.638481000 | 3.177271000  | 0.000393000  |
| 1 | -7.085305000 | -1.785053000 | -0.000277000 | 1 | -6.641993000 | -1.969920000 | -0.000222000 |
| 8 | -8.196932000 | 0.472595000  | -0.000193000 | 8 | -7.796179000 | 0.266744000  | -0.000048000 |

|                                                        |              |              |              |                                                                         |               |              |              |
|--------------------------------------------------------|--------------|--------------|--------------|-------------------------------------------------------------------------|---------------|--------------|--------------|
| 6                                                      | -8.759896000 | 1.776068000  | -0.000083000 | 6                                                                       | -8.401468000  | 1.561939000  | -0.000017000 |
| 1                                                      | -8.468640000 | 2.346477000  | 0.899782000  | 1                                                                       | -8.077351000  | 2.126391000  | 0.894019000  |
| 1                                                      | -8.468615000 | 2.346642000  | -0.899836000 | 1                                                                       | -8.076789000  | 2.126734000  | -0.893613000 |
| 1                                                      | -9.848239000 | 1.633618000  | -0.000112000 | 6                                                                       | -9.904857000  | 1.360262000  | -0.000505000 |
|                                                        |              |              |              | 1                                                                       | -10.221855000 | 0.798627000  | 0.891665000  |
|                                                        |              |              |              | 1                                                                       | -10.221339000 | 0.798834000  | -0.892981000 |
|                                                        |              |              |              | 1                                                                       | -10.417785000 | 2.334672000  | -0.000516000 |
| D2-NH <sub>2</sub><br>E(RB3LYP) = -1184.24159401 a. u. |              |              |              | D2-N(CH <sub>3</sub> ) <sub>2</sub><br>E(RB3LYP) = -1262.85188298 a. u. |               |              |              |
| 6                                                      | 6.021580000  | -0.442570000 | 0.000364000  | 6                                                                       | -6.762189000  | -0.383642000 | 0.006482000  |
| 6                                                      | 7.178643000  | 0.292961000  | 0.001804000  | 6                                                                       | -7.905268000  | 0.374028000  | 0.006218000  |
| 6                                                      | 7.163195000  | 1.722562000  | 0.002954000  | 6                                                                       | -7.862434000  | 1.803000000  | 0.001159000  |
| 7                                                      | 7.111774000  | 2.887073000  | 0.003969000  | 7                                                                       | -7.788867000  | 2.966352000  | -0.003119000 |
| 6                                                      | 8.476174000  | -0.431428000 | 0.002282000  | 6                                                                       | -9.216092000  | -0.325192000 | 0.011387000  |
| 8                                                      | 8.591585000  | -1.640303000 | 0.001568000  | 8                                                                       | -9.355166000  | -1.531692000 | 0.015919000  |
| 8                                                      | 9.533311000  | 0.410053000  | 0.003578000  | 8                                                                       | -10.257291000 | 0.536284000  | 0.010520000  |
| 1                                                      | 10.326129000 | -0.156255000 | 0.003708000  | 1                                                                       | -11.060393000 | -0.015285000 | 0.014116000  |
| 6                                                      | 2.235065000  | -0.284305000 | -0.001818000 | 6                                                                       | -2.973608000  | -0.301479000 | -0.001536000 |
| 1                                                      | 2.080767000  | 0.799070000  | -0.001723000 | 1                                                                       | -2.796856000  | 0.778444000  | -0.005701000 |
| 1                                                      | 6.161173000  | -1.528176000 | -0.000289000 | 1                                                                       | -6.922837000  | -1.466340000 | 0.010597000  |
| 6                                                      | 3.592862000  | -0.744433000 | -0.001320000 | 6                                                                       | -4.340083000  | -0.733616000 | 0.002723000  |
| 6                                                      | 4.690342000  | 0.071794000  | -0.000297000 | 6                                                                       | -5.421498000  | 0.104351000  | 0.002009000  |
| 1                                                      | 3.750847000  | -1.829900000 | -0.001682000 | 1                                                                       | -4.520012000  | -1.815691000 | 0.006862000  |
| 1                                                      | 4.555143000  | 1.158105000  | 0.000116000  | 1                                                                       | -5.264780000  | 1.187756000  | -0.002093000 |
| 6                                                      | 1.169211000  | -1.131687000 | -0.002197000 | 6                                                                       | -1.925177000  | -1.170957000 | -0.000601000 |
| 1                                                      | 1.384075000  | -2.206736000 | -0.002116000 | 1                                                                       | -2.162778000  | -2.241249000 | 0.003469000  |
| 6                                                      | -3.551345000 | -2.639730000 | 0.000786000  | 6                                                                       | 2.763542000   | -2.778194000 | -0.004272000 |
| 6                                                      | -2.572719000 | -1.582731000 | -0.001017000 | 6                                                                       | 1.805555000   | -1.701921000 | -0.006948000 |
| 6                                                      | -4.888304000 | -2.369450000 | 0.001103000  | 6                                                                       | 4.105544000   | -2.534432000 | -0.007215000 |
| 6                                                      | -3.034714000 | -0.229445000 | -0.002788000 | 6                                                                       | 2.295583000   | -0.358609000 | -0.012555000 |
| 6                                                      | -5.381678000 | -1.015137000 | -0.001054000 | 6                                                                       | 4.626893000   | -1.189758000 | -0.014949000 |
| 6                                                      | -4.428968000 | 0.051803000  | -0.003204000 | 6                                                                       | 3.694713000   | -0.107240000 | -0.017060000 |
| 1                                                      | -3.198602000 | -3.674164000 | 0.001676000  | 1                                                                       | 2.390481000   | -3.805507000 | 0.000533000  |
| 6                                                      | -1.193787000 | -1.831593000 | -0.001089000 | 6                                                                       | 0.421911000   | -1.921464000 | -0.003305000 |
| 6                                                      | -2.081922000 | 0.840509000  | -0.004032000 | 6                                                                       | 1.366290000   | 0.731759000  | -0.012461000 |
| 6                                                      | -4.894049000 | 1.404463000  | -0.004256000 | 6                                                                       | 4.192215000   | 1.231877000  | -0.020240000 |
| 6                                                      | -0.714926000 | 0.544204000  | -0.003899000 | 6                                                                       | -0.006479000  | 0.464797000  | -0.008735000 |
| 6                                                      | -0.247053000 | -0.787284000 | -0.002478000 | 6                                                                       | -0.502512000  | -0.856864000 | -0.004442000 |
| 1                                                      | -0.843460000 | -2.867473000 | 0.000045000  | 1                                                                       | 0.049358000   | -2.949589000 | 0.000814000  |

|                                                          |              |              |              |                                                          |              |              |              |
|----------------------------------------------------------|--------------|--------------|--------------|----------------------------------------------------------|--------------|--------------|--------------|
| 6                                                        | -2.577356000 | 2.194864000  | -0.005395000 | 6                                                        | 1.892827000  | 2.074776000  | -0.015182000 |
| 1                                                        | -0.004670000 | 1.373296000  | -0.005064000 | 1                                                        | -0.699211000 | 1.308621000  | -0.008759000 |
| 6                                                        | -6.751107000 | -0.717403000 | 0.000910000  | 6                                                        | 6.002756000  | -0.925906000 | -0.017576000 |
| 6                                                        | -6.270642000 | 1.660436000  | -0.002507000 | 6                                                        | 5.572681000  | 1.463069000  | -0.022757000 |
| 6                                                        | -7.210753000 | 0.612200000  | -0.000174000 | 6                                                        | 6.506073000  | 0.397172000  | -0.030927000 |
| 1                                                        | -5.614295000 | -3.186393000 | 0.002169000  | 1                                                        | 4.814735000  | -3.366162000 | -0.004787000 |
| 6                                                        | -3.913789000 | 2.462738000  | -0.005210000 | 6                                                        | 3.234966000  | 2.312124000  | -0.017958000 |
| 1                                                        | -1.851840000 | 3.012192000  | -0.006854000 | 1                                                        | 1.186150000  | 2.908494000  | -0.014619000 |
| 1                                                        | -6.620930000 | 2.696488000  | -0.007084000 | 1                                                        | 5.916387000  | 2.496489000  | -0.020323000 |
| 1                                                        | -4.266978000 | 3.496995000  | -0.006602000 | 1                                                        | 3.610980000  | 3.338441000  | -0.019648000 |
| 1                                                        | -7.475388000 | -1.536876000 | -0.000762000 | 1                                                        | 6.684405000  | -1.775265000 | -0.010924000 |
| 7                                                        | -8.573911000 | 0.888397000  | -0.060922000 | 7                                                        | 7.868009000  | 0.642801000  | -0.053674000 |
| 1                                                        | -8.848159000 | 1.801033000  | 0.288606000  | 6                                                        | 8.804523000  | -0.459315000 | 0.067798000  |
| 1                                                        | -9.181775000 | 0.154468000  | 0.288539000  | 1                                                        | 8.698737000  | -1.006526000 | 1.024855000  |
|                                                          |              |              |              | 1                                                        | 8.679609000  | -1.188842000 | -0.751100000 |
|                                                          |              |              |              | 1                                                        | 9.828541000  | -0.069406000 | 0.010278000  |
|                                                          |              |              |              | 6                                                        | 8.361528000  | 2.002548000  | 0.066480000  |
|                                                          |              |              |              | 1                                                        | 9.457336000  | 1.993604000  | 0.011063000  |
|                                                          |              |              |              | 1                                                        | 7.992140000  | 2.641715000  | -0.754114000 |
|                                                          |              |              |              | 1                                                        | 8.070119000  | 2.480024000  | 1.022286000  |
| D2-PhCH <sub>3</sub><br>E(RB3LYP) = -1399.26883364 a. u. |              |              |              | D2-PhNH <sub>2</sub><br>E(RB3LYP) = -1415.31174049 a. u. |              |              |              |
| 6                                                        | 7.970684000  | 0.256951000  | -0.011199000 | 6                                                        | 7.965555000  | 0.258597000  | -0.009841000 |
| 6                                                        | 9.083072000  | -0.541902000 | 0.034482000  | 6                                                        | 9.080090000  | -0.537839000 | 0.035485000  |
| 6                                                        | 8.986124000  | -1.966281000 | 0.112892000  | 6                                                        | 8.986431000  | -1.962431000 | 0.112975000  |
| 7                                                        | 8.868416000  | -3.124131000 | 0.176546000  | 7                                                        | 8.871553000  | -3.120642000 | 0.175912000  |
| 6                                                        | 10.420749000 | 0.106699000  | 0.000740000  | 6                                                        | 10.415897000 | 0.113689000  | 0.002351000  |
| 8                                                        | 10.603771000 | 1.305078000  | -0.065090000 | 8                                                        | 10.596765000 | 1.312577000  | -0.062601000 |
| 8                                                        | 11.427153000 | -0.792555000 | 0.051900000  | 8                                                        | 11.424780000 | -0.783195000 | 0.052973000  |
| 1                                                        | 12.251979000 | -0.274581000 | 0.024607000  | 1                                                        | 12.247971000 | -0.262658000 | 0.026064000  |
| 6                                                        | 4.180356000  | 0.307124000  | -0.018307000 | 6                                                        | 4.175503000  | 0.304064000  | -0.017693000 |
| 1                                                        | 3.968014000  | -0.764773000 | 0.040414000  | 1                                                        | 3.963602000  | -0.767952000 | 0.040247000  |
| 1                                                        | 8.171310000  | 1.331295000  | -0.070181000 | 1                                                        | 8.164044000  | 1.333395000  | -0.068095000 |
| 6                                                        | 5.562233000  | 0.692602000  | -0.038199000 | 6                                                        | 5.556652000  | 0.690564000  | -0.036998000 |
| 6                                                        | 6.611757000  | -0.181739000 | 0.011165000  | 6                                                        | 6.607791000  | -0.182381000 | 0.011991000  |
| 1                                                        | 5.779293000  | 1.766105000  | -0.097054000 | 1                                                        | 5.772624000  | 1.764369000  | -0.095099000 |
| 1                                                        | 6.416418000  | -1.257246000 | 0.070206000  | 1                                                        | 6.414052000  | -1.258214000 | 0.070260000  |
| 6                                                        | 3.162680000  | 1.208967000  | -0.068359000 | 6                                                        | 3.157087000  | 1.205628000  | -0.067421000 |
| 1                                                        | 3.433994000  | 2.269476000  | -0.126055000 | 1                                                        | 3.428427000  | 2.266226000  | -0.124316000 |
| 6                                                        | -1.470537000 | 2.964497000  | -0.161448000 | 6                                                        | -1.475992000 | 2.961372000  | -0.160546000 |

|   |               |              |              |   |               |              |              |
|---|---------------|--------------|--------------|---|---------------|--------------|--------------|
| 6 | -0.550565000  | 1.857272000  | -0.102224000 | 6 | -0.555625000  | 1.854385000  | -0.101837000 |
| 6 | -2.819922000  | 2.765566000  | -0.148339000 | 6 | -2.825360000  | 2.762029000  | -0.147996000 |
| 6 | -1.081652000  | 0.532185000  | -0.031266000 | 6 | -1.086984000  | 0.529073000  | -0.032199000 |
| 6 | -3.382265000  | 1.441426000  | -0.073643000 | 6 | -3.388045000  | 1.437782000  | -0.074401000 |
| 6 | -2.490964000  | 0.325768000  | -0.019346000 | 6 | -2.495866000  | 0.322748000  | -0.020984000 |
| 1 | -1.062275000  | 3.976611000  | -0.217166000 | 1 | -1.067964000  | 3.973669000  | -0.215491000 |
| 6 | 0.840391000   | 2.031992000  | -0.112301000 | 6 | 0.835197000   | 2.029014000  | -0.111277000 |
| 6 | -0.189257000  | -0.586256000 | 0.027806000  | 6 | -0.194368000  | -0.589558000 | 0.026157000  |
| 6 | -3.024547000  | -0.998256000 | 0.046889000  | 6 | -3.030560000  | -1.000941000 | 0.043698000  |
| 6 | 1.192242000   | -0.363168000 | 0.015409000  | 6 | 1.186989000   | -0.366547000 | 0.014337000  |
| 6 | 1.728616000   | 0.939760000  | -0.054190000 | 6 | 1.723531000   | 0.936591000  | -0.053894000 |
| 1 | 1.245695000   | 3.046001000  | -0.166476000 | 1 | 1.240652000   | 3.043064000  | -0.164413000 |
| 6 | -0.755278000  | -1.911047000 | 0.099406000  | 6 | -0.760944000  | -1.914254000 | 0.096423000  |
| 1 | 1.857624000   | -1.227309000 | 0.061089000  | 1 | 1.852423000   | -1.230730000 | 0.059291000  |
| 6 | -4.767435000  | 1.212587000  | -0.060298000 | 6 | -4.772853000  | 1.208800000  | -0.063926000 |
| 6 | -4.416003000  | -1.175789000 | 0.056643000  | 6 | -4.421641000  | -1.178131000 | 0.055116000  |
| 6 | -5.302663000  | -0.085142000 | 0.004237000  | 6 | -5.311559000  | -0.088713000 | 0.001234000  |
| 1 | -3.502942000  | 3.617413000  | -0.193898000 | 1 | -3.508418000  | 3.613929000  | -0.193338000 |
| 6 | -2.104260000  | -2.106282000 | 0.109046000  | 6 | -2.110021000  | -2.109019000 | 0.105343000  |
| 1 | -0.073849000  | -2.764037000 | 0.145982000  | 1 | -0.079740000  | -2.767507000 | 0.142480000  |
| 1 | -4.814627000  | -2.189783000 | 0.133652000  | 1 | -4.818400000  | -2.192631000 | 0.135222000  |
| 1 | -2.513982000  | -3.117897000 | 0.163716000  | 1 | -2.519841000  | -3.120724000 | 0.158953000  |
| 1 | -5.441030000  | 2.069668000  | -0.128782000 | 1 | -5.444744000  | 2.066913000  | -0.136264000 |
| 6 | -8.737505000  | -1.576042000 | -0.667954000 | 6 | -8.743616000  | -1.609181000 | -0.635237000 |
| 6 | -9.593878000  | -0.715976000 | 0.039262000  | 6 | -9.602787000  | -0.718266000 | 0.037108000  |
| 6 | -9.011902000  | 0.353726000  | 0.733158000  | 6 | -9.024725000  | 0.383197000  | 0.697613000  |
| 6 | -7.358456000  | -1.376132000 | -0.679361000 | 6 | -7.367178000  | -1.403296000 | -0.641815000 |
| 6 | -7.630721000  | 0.559916000  | 0.723114000  | 6 | -7.647228000  | 0.581662000  | 0.680383000  |
| 6 | -6.773678000  | -0.301030000 | 0.016839000  | 6 | -6.779945000  | -0.303934000 | 0.012920000  |
| 1 | -9.160426000  | -2.414772000 | -1.228154000 | 1 | -9.166341000  | -2.464820000 | -1.168920000 |
| 1 | -7.210412000  | 1.389192000  | 1.296320000  | 1 | -7.232699000  | 1.431883000  | 1.226499000  |
| 1 | -9.650029000  | 1.036351000  | 1.300727000  | 1 | -9.666795000  | 1.085787000  | 1.235995000  |
| 1 | -6.725092000  | -2.049855000 | -1.260684000 | 1 | -6.734763000  | -2.102574000 | -1.193176000 |
| 6 | -11.085744000 | -0.945198000 | 0.046414000  | 7 | -10.985212000 | -0.886246000 | -0.004247000 |
| 1 | -11.497404000 | -0.934153000 | -0.976867000 | 1 | -11.494815000 | -0.446917000 | 0.756208000  |
| 1 | -11.338035000 | -1.926299000 | 0.483293000  | 1 | -11.298586000 | -1.839570000 | -0.159155000 |
| 1 | -11.610552000 | -0.173482000 | 0.628599000  |   |               |              |              |

**Table S11.** Cartesian coordinates (in Angstrom unit) of B3LYP/cc-pVDZ optimized geometries of TPA based D- $\pi$ -A systems.

| D3<br>E(RB3LYP) = -1262.81666934 a. u. |              |              |              | D3-CH <sub>3</sub><br>E(RB3LYP) = -1302.13432812 a. u. |              |              |              |
|----------------------------------------|--------------|--------------|--------------|--------------------------------------------------------|--------------|--------------|--------------|
| 6                                      | 6.566075000  | -0.477895000 | -0.168300000 | 6                                                      | 6.841975000  | -0.607304000 | -0.163439000 |
| 6                                      | 7.729039000  | 0.177953000  | 0.148553000  | 6                                                      | 8.032006000  | -0.008807000 | 0.167520000  |
| 6                                      | 7.722488000  | 1.471860000  | 0.755940000  | 6                                                      | 8.080515000  | 1.275840000  | 0.792319000  |
| 7                                      | 7.677758000  | 2.526518000  | 1.250651000  | 7                                                      | 8.080533000  | 2.324786000  | 1.301079000  |
| 6                                      | 9.020757000  | -0.488692000 | -0.154579000 | 6                                                      | 9.293518000  | -0.728802000 | -0.138750000 |
| 8                                      | 9.129674000  | -1.584287000 | -0.667821000 | 8                                                      | 9.355967000  | -1.821344000 | -0.666427000 |
| 8                                      | 10.084376000 | 0.263335000  | 0.206745000  | 8                                                      | 10.388487000 | -0.030518000 | 0.237164000  |
| 1                                      | 10.872355000 | -0.257650000 | -0.031640000 | 1                                                      | 11.152931000 | -0.583727000 | -0.005073000 |
| 6                                      | 2.782018000  | -0.310637000 | -0.119437000 | 6                                                      | 3.069152000  | -0.272344000 | -0.130212000 |
| 1                                      | 2.629733000  | 0.671546000  | 0.338759000  | 1                                                      | 2.957672000  | 0.709380000  | 0.340638000  |
| 1                                      | 6.699732000  | -1.461653000 | -0.629186000 | 1                                                      | 6.933603000  | -1.589906000 | -0.637011000 |
| 6                                      | 4.136184000  | -0.733810000 | -0.307473000 | 6                                                      | 4.403960000  | -0.752433000 | -0.317434000 |
| 6                                      | 5.239112000  | -0.002719000 | 0.044590000  | 6                                                      | 5.536831000  | -0.076001000 | 0.049753000  |
| 1                                      | 4.290789000  | -1.717272000 | -0.768252000 | 1                                                      | 4.517295000  | -1.735618000 | -0.790824000 |
| 1                                      | 5.109025000  | 0.981395000  | 0.505978000  | 1                                                      | 5.448344000  | 0.906748000  | 0.523852000  |
| 6                                      | 1.711573000  | -1.073124000 | -0.485363000 | 6                                                      | 1.967885000  | -0.982097000 | -0.511838000 |
| 1                                      | 1.925572000  | -2.046446000 | -0.942992000 | 1                                                      | 2.141738000  | -1.957710000 | -0.981644000 |
| 7                                      | -3.871877000 | 0.027046000  | -0.015130000 | 7                                                      | -3.564275000 | 0.353277000  | -0.053746000 |
| 6                                      | -5.966600000 | -1.092449000 | -0.636807000 | 6                                                      | -5.681766000 | -0.685540000 | -0.747296000 |
| 6                                      | -4.806017000 | -1.039988000 | 0.152284000  | 6                                                      | -4.544174000 | -0.679316000 | 0.076260000  |
| 6                                      | -6.889921000 | -2.124458000 | -0.458827000 | 6                                                      | -6.646234000 | -1.681722000 | -0.606402000 |
| 1                                      | -7.788542000 | -2.153050000 | -1.079162000 | 1                                                      | -7.524268000 | -1.666512000 | -1.258079000 |
| 6                                      | -4.585157000 | -2.037186000 | 1.117252000  | 6                                                      | -4.397912000 | -1.691887000 | 1.035174000  |
| 6                                      | -6.663424000 | -3.122524000 | 0.493974000  | 6                                                      | -6.507046000 | -2.708835000 | 0.342245000  |
| 1                                      | -3.689969000 | -1.993467000 | 1.739835000  | 1                                                      | -3.523345000 | -1.693614000 | 1.688241000  |
| 1                                      | -7.384838000 | -3.931202000 | 0.626840000  | 6                                                      | -5.363904000 | -2.693481000 | 1.154216000  |
| 6                                      | -5.505647000 | -3.074278000 | 1.277322000  | 1                                                      | -5.229623000 | -3.473616000 | 1.908140000  |
| 1                                      | -5.321990000 | -3.842701000 | 2.031645000  | 1                                                      | -5.806311000 | 0.097932000  | -1.496881000 |
| 1                                      | -6.140658000 | -0.319312000 | -1.386881000 | 6                                                      | 0.573261000  | -0.607111000 | -0.375677000 |
| 6                                      | 0.302071000  | -0.757505000 | -0.346416000 | 6                                                      | -0.429215000 | -1.479489000 | -0.854842000 |
| 6                                      | -0.663060000 | -1.679284000 | -0.808959000 | 6                                                      | 0.138704000  | 0.600542000  | 0.219726000  |
| 6                                      | -0.181662000 | 0.437891000  | 0.235192000  | 1                                                      | -0.132258000 | -2.418771000 | -1.328995000 |
| 1                                      | -0.327465000 | -2.610552000 | -1.272817000 | 1                                                      | 0.870111000  | 1.303387000  | 0.622827000  |
| 1                                      | 0.520176000  | 1.177590000  | 0.624455000  | 6                                                      | -1.780053000 | -1.173398000 | -0.758958000 |
| 6                                      | -2.025701000 | -1.430994000 | -0.710066000 | 6                                                      | -1.206587000 | 0.914692000  | 0.327723000  |
| 6                                      | -1.539129000 | 0.693937000  | 0.346645000  | 1                                                      | -2.522956000 | -1.867615000 | -1.152160000 |

|                                                                       |              |              |              |                                                  |              |              |              |
|-----------------------------------------------------------------------|--------------|--------------|--------------|--------------------------------------------------|--------------|--------------|--------------|
| 1                                                                     | -2.739322000 | -2.161601000 | -1.091436000 | 1                                                | -1.505490000 | 1.847508000  | 0.806396000  |
| 1                                                                     | -1.876950000 | 1.619294000  | 0.813781000  | 6                                                | -2.200483000 | 0.035056000  | -0.163422000 |
| 6                                                                     | -2.495022000 | -0.235071000 | -0.127074000 | 6                                                | -4.006050000 | 1.710378000  | -0.075994000 |
| 6                                                                     | -4.366966000 | 1.365014000  | -0.077112000 | 6                                                | -4.941512000 | 2.162746000  | 0.869218000  |
| 6                                                                     | -5.300125000 | 1.816170000  | 0.870679000  | 6                                                | -3.529422000 | 2.602504000  | -1.051763000 |
| 6                                                                     | -3.941268000 | 2.238108000  | -1.092386000 | 1                                                | -5.314259000 | 1.472317000  | 1.627539000  |
| 1                                                                     | -5.632255000 | 1.140294000  | 1.660330000  | 1                                                | -2.812253000 | 2.252274000  | -1.796059000 |
| 1                                                                     | -3.224925000 | 1.887632000  | -1.837312000 | 6                                                | -5.390755000 | 3.484096000  | 0.835256000  |
| 6                                                                     | -5.798768000 | 3.118157000  | 0.799385000  | 6                                                | -3.972016000 | 3.926306000  | -1.068105000 |
| 6                                                                     | -4.432757000 | 3.543606000  | -1.146293000 | 1                                                | -6.118025000 | 3.822380000  | 1.576860000  |
| 1                                                                     | -6.523889000 | 3.456248000  | 1.543041000  | 1                                                | -3.592923000 | 4.608890000  | -1.832124000 |
| 1                                                                     | -4.093261000 | 4.212077000  | -1.940681000 | 6                                                | -4.906200000 | 4.374061000  | -0.128400000 |
| 6                                                                     | -5.365427000 | 3.989922000  | -0.204497000 | 6                                                | -7.557042000 | -3.785156000 | 0.475636000  |
| 1                                                                     | -5.752882000 | 5.009468000  | -0.253704000 | 1                                                | -7.677290000 | -4.346939000 | -0.466144000 |
|                                                                       |              |              |              | 1                                                | -7.298465000 | -4.505886000 | 1.265272000  |
|                                                                       |              |              |              | 1                                                | -8.542950000 | -3.355835000 | 0.721385000  |
|                                                                       |              |              |              | 1                                                | -5.255324000 | 5.408407000  | -0.148478000 |
| D3-C <sub>5</sub> H <sub>11</sub><br>E(RB3LYP) = -1459.39052995 a. u. |              |              |              | D3-isopropyl<br>E(RB3LYP) = -1380.76204245 a. u. |              |              |              |
| 6                                                                     | 8.094959000  | -1.340020000 | -0.180188000 | 6                                                | 7.308276000  | -0.147511000 | -0.169989000 |
| 6                                                                     | 9.374809000  | -0.936262000 | 0.108029000  | 6                                                | 8.376203000  | 0.660596000  | 0.130660000  |
| 6                                                                     | 9.650224000  | 0.348557000  | 0.670517000  | 6                                                | 8.200684000  | 1.956321000  | 0.708033000  |
| 7                                                                     | 9.836082000  | 1.404262000  | 1.128871000  | 7                                                | 8.018292000  | 3.007377000  | 1.178290000  |
| 6                                                                     | 10.491470000 | -1.871323000 | -0.178440000 | 6                                                | 9.743642000  | 0.160170000  | -0.157986000 |
| 8                                                                     | 10.359712000 | -2.981294000 | -0.654534000 | 8                                                | 9.995038000  | -0.923485000 | -0.646290000 |
| 8                                                                     | 11.695197000 | -1.351296000 | 0.151142000  | 8                                                | 10.700516000 | 1.051589000  | 0.184995000  |
| 1                                                                     | 12.351099000 | -2.035657000 | -0.073632000 | 1                                                | 11.549486000 | 0.631236000  | -0.042272000 |
| 6                                                                     | 4.433047000  | -0.373742000 | -0.118771000 | 6                                                | 3.534654000  | -0.471417000 | -0.120730000 |
| 1                                                                     | 4.496746000  | 0.633004000  | 0.305872000  | 1                                                | 3.255260000  | 0.493015000  | 0.314851000  |
| 1                                                                     | 8.011294000  | -2.344252000 | -0.607627000 | 1                                                | 7.569085000  | -1.116047000 | -0.608269000 |
| 6                                                                     | 5.664558000  | -1.079486000 | -0.298398000 | 6                                                | 4.932296000  | -0.719461000 | -0.300638000 |
| 6                                                                     | 6.901843000  | -0.587578000 | 0.022738000  | 6                                                | 5.930793000  | 0.156501000  | 0.033173000  |
| 1                                                                     | 5.602260000  | -2.088068000 | -0.725590000 | 1                                                | 5.214051000  | -1.684992000 | -0.738751000 |
| 1                                                                     | 6.988608000  | 0.416378000  | 0.450448000  | 1                                                | 5.673296000  | 1.125846000  | 0.471880000  |
| 6                                                                     | 3.221158000  | -0.904605000 | -0.453307000 | 6                                                | 2.572572000  | -1.374989000 | -0.467230000 |
| 1                                                                     | 3.220076000  | -1.915699000 | -0.878125000 | 1                                                | 2.912096000  | -2.322725000 | -0.902276000 |
| 7                                                                     | -1.999086000 | 1.360979000  | 0.004454000  | 7                                                | -3.106139000 | -0.997852000 | -0.010684000 |
| 6                                                                     | -4.268322000 | 0.658449000  | -0.626265000 | 6                                                | -5.053634000 | -2.367418000 | -0.608525000 |
| 6                                                                     | -3.135691000 | 0.512428000  | 0.183914000  | 6                                                | -3.900706000 | -2.169979000 | 0.169065000  |

|   |               |              |              |   |              |              |              |
|---|---------------|--------------|--------------|---|--------------|--------------|--------------|
| 6 | -5.388080000  | -0.156643000 | -0.434231000 | 6 | -5.843524000 | -3.502618000 | -0.417005000 |
| 1 | -6.252586000  | -0.012411000 | -1.083590000 | 1 | -6.737496000 | -3.643224000 | -1.028882000 |
| 6 | -3.146252000  | -0.469891000 | 1.189089000  | 6 | -3.553203000 | -3.127482000 | 1.137365000  |
| 6 | -5.408859000  | -1.148559000 | 0.556130000  | 6 | -5.489977000 | -4.460427000 | 0.538417000  |
| 1 | -2.274818000  | -0.588484000 | 1.835661000  | 1 | -2.665215000 | -2.971965000 | 1.752388000  |
| 6 | -4.261651000  | -1.285678000 | 1.359118000  | 6 | -4.340011000 | -4.267279000 | 1.310968000  |
| 1 | -4.248973000  | -2.043036000 | 2.148252000  | 1 | -4.058357000 | -5.002960000 | 2.067829000  |
| 1 | -4.274538000  | 1.418485000  | -1.409590000 | 1 | -5.326896000 | -1.625270000 | -1.360328000 |
| 6 | 1.912036000   | -0.294757000 | -0.319180000 | 6 | 1.134272000  | -1.242199000 | -0.333252000 |
| 6 | 0.768661000   | -1.006170000 | -0.745899000 | 6 | 0.297251000  | -2.292719000 | -0.770786000 |
| 6 | 1.697258000   | 0.993995000  | 0.224089000  | 6 | 0.498255000  | -0.105729000 | 0.219628000  |
| 1 | 0.894997000   | -2.002014000 | -1.179037000 | 1 | 0.751470000  | -3.183437000 | -1.212994000 |
| 1 | 2.543593000   | 1.580724000  | 0.585911000  | 1 | 1.097608000  | 0.728760000  | 0.588185000  |
| 6 | -0.509730000  | -0.473123000 | -0.649530000 | 6 | -1.086009000 | -2.221860000 | -0.674186000 |
| 6 | 0.426093000   | 1.534582000  | 0.332210000  | 6 | -0.880879000 | -0.025622000 | 0.327969000  |
| 1 | -1.365722000  | -1.048788000 | -1.002108000 | 1 | -1.697892000 | -3.048274000 | -1.036356000 |
| 1 | 0.296898000   | 2.524534000  | 0.770282000  | 1 | -1.336840000 | 0.859704000  | 0.771730000  |
| 6 | -0.710494000  | 0.814047000  | -0.106436000 | 6 | -1.708030000 | -1.083176000 | -0.118990000 |
| 6 | -2.208547000  | 2.770698000  | -0.075030000 | 6 | -3.766402000 | 0.266992000  | -0.092647000 |
| 6 | -3.037938000  | 3.413624000  | 0.858739000  | 6 | -4.728745000 | 0.628195000  | 0.863832000  |
| 6 | -1.607476000  | 3.527622000  | -1.095180000 | 6 | -3.479728000 | 1.162137000  | -1.133554000 |
| 1 | -3.507258000  | 2.828419000  | 1.651175000  | 1 | -4.960404000 | -0.060150000 | 1.678578000  |
| 1 | -0.972730000  | 3.030498000  | -1.830658000 | 1 | -2.741392000 | 0.891139000  | -1.890426000 |
| 6 | -3.260539000  | 4.788861000  | 0.769974000  | 6 | -5.386278000 | 1.854328000  | 0.773905000  |
| 6 | -1.822832000  | 4.905073000  | -1.166650000 | 6 | -4.134071000 | 2.393778000  | -1.201084000 |
| 1 | -3.907427000  | 5.275770000  | 1.503323000  | 1 | -6.129907000 | 2.105449000  | 1.534076000  |
| 1 | -1.349036000  | 5.481021000  | -1.964877000 | 1 | -3.894082000 | 3.076889000  | -2.020481000 |
| 6 | -2.651667000  | 5.542972000  | -0.238135000 | 6 | -5.101444000 | 2.767127000  | -0.256307000 |
| 1 | -2.823315000  | 6.619415000  | -0.301139000 | 1 | -6.107098000 | -5.349661000 | 0.681952000  |
| 6 | -6.596032000  | -2.065165000 | 0.796361000  | 6 | -5.810681000 | 4.111549000  | -0.352389000 |
| 1 | -6.891724000  | -1.976903000 | 1.858421000  | 1 | -5.406574000 | 4.621032000  | -1.244732000 |
| 1 | -6.255521000  | -3.111052000 | 0.679654000  | 6 | -5.511940000 | 5.005709000  | 0.864419000  |
| 6 | -7.830440000  | -1.845979000 | -0.081885000 | 6 | -7.326780000 | 3.947542000  | -0.561224000 |
| 1 | -8.190104000  | -0.807305000 | 0.034216000  | 1 | -7.544846000 | 3.338323000  | -1.452642000 |
| 1 | -7.555411000  | -1.959116000 | -1.146372000 | 1 | -7.801034000 | 3.456311000  | 0.305020000  |
| 6 | -8.972360000  | -2.813842000 | 0.246751000  | 1 | -7.809835000 | 4.930044000  | -0.691193000 |
| 1 | -9.249994000  | -2.704132000 | 1.312244000  | 1 | -5.902893000 | 4.561480000  | 1.795239000  |
| 1 | -8.613850000  | -3.854643000 | 0.134413000  | 1 | -5.983603000 | 5.995051000  | 0.745080000  |
| 6 | -10.217407000 | -2.611579000 | -0.623286000 | 1 | -4.428629000 | 5.156559000  | 0.994438000  |
| 1 | -10.574479000 | -1.571206000 | -0.510204000 |   |              |              |              |
| 1 | -9.938553000  | -2.721327000 | -1.687649000 |   |              |              |              |

|                                              |               |              |              |                                           |              |              |              |
|----------------------------------------------|---------------|--------------|--------------|-------------------------------------------|--------------|--------------|--------------|
| 6                                            | -11.353194000 | -3.581346000 | -0.289504000 |                                           |              |              |              |
| 1                                            | -11.678966000 | -3.470788000 | 0.758933000  |                                           |              |              |              |
| 1                                            | -11.038068000 | -4.629776000 | -0.427561000 |                                           |              |              |              |
| 1                                            | -12.232363000 | -3.410510000 | -0.931269000 |                                           |              |              |              |
| D3-t-but<br>E(RB3LYP) = -1420.07278757 a. u. |               |              |              | D3-OH<br>E(RB3LYP) = -1338.04286702 a. u. |              |              |              |
| 6                                            | -7.487911000  | -0.060727000 | 0.184688000  | 6                                         | 6.807551000  | -0.406214000 | -0.163510000 |
| 6                                            | -8.530918000  | 0.769802000  | -0.141359000 | 6                                         | 7.943748000  | 0.303515000  | 0.136154000  |
| 6                                            | -8.317614000  | 2.032387000  | -0.776529000 | 6                                         | 7.885056000  | 1.608405000  | 0.716460000  |
| 7                                            | -8.104609000  | 3.055110000  | -1.294021000 | 7                                         | 7.797604000  | 2.670402000  | 1.189427000  |
| 6                                            | -9.911411000  | 0.329801000  | 0.181445000  | 6                                         | 9.260548000  | -0.315530000 | -0.156661000 |
| 8                                            | -10.194328000 | -0.722298000 | 0.719042000  | 8                                         | 9.414048000  | -1.416347000 | -0.647375000 |
| 8                                            | -10.841029000 | 1.237896000  | -0.191490000 | 8                                         | 10.293725000 | 0.486880000  | 0.185286000  |
| 1                                            | -11.701320000 | 0.857300000  | 0.061768000  | 1                                         | 11.101287000 | -0.006925000 | -0.045075000 |
| 6                                            | -3.728123000  | -0.515404000 | 0.116397000  | 6                                         | 3.020352000  | -0.397077000 | -0.108148000 |
| 1                                            | -3.420859000  | 0.419048000  | -0.363513000 | 1                                         | 2.826810000  | 0.587618000  | 0.328730000  |
| 1                                            | -7.776813000  | -0.999749000 | 0.667335000  | 1                                         | 6.980828000  | -1.393199000 | -0.603997000 |
| 6                                            | -5.131407000  | -0.707596000 | 0.319065000  | 6                                         | 4.390353000  | -0.766318000 | -0.290347000 |
| 6                                            | -6.103140000  | 0.186672000  | -0.043996000 | 6                                         | 5.462929000  | 0.017835000  | 0.042869000  |
| 1                                            | -5.441099000  | -1.642940000 | 0.801563000  | 1                                         | 4.585593000  | -1.752245000 | -0.730195000 |
| 1                                            | -5.817538000  | 1.126615000  | -0.527046000 | 1                                         | 5.292657000  | 1.005443000  | 0.483362000  |
| 6                                            | -2.793427000  | -1.434961000 | 0.494450000  | 6                                         | 1.982398000  | -1.212896000 | -0.454452000 |
| 1                                            | -3.160153000  | -2.350590000 | 0.973914000  | 1                                         | 2.237810000  | -2.186204000 | -0.890639000 |
| 7                                            | 2.890352000   | -1.266994000 | -0.018584000 | 7                                         | -3.640816000 | -0.338269000 | -0.000017000 |
| 6                                            | 4.791706000   | -2.675375000 | 0.635302000  | 6                                         | -5.730513000 | -1.462243000 | -0.626066000 |
| 6                                            | 3.644320000   | -2.472292000 | -0.148908000 | 6                                         | -4.552906000 | -1.426148000 | 0.139416000  |
| 6                                            | 5.541255000   | -3.844545000 | 0.492724000  | 6                                         | -6.637532000 | -2.512098000 | -0.471058000 |
| 1                                            | 6.431420000   | -3.989440000 | 1.109135000  | 1                                         | -7.548376000 | -2.526660000 | -1.074028000 |
| 6                                            | 3.261049000   | -3.458322000 | -1.073859000 | 6                                         | -4.302958000 | -2.458142000 | 1.060799000  |
| 6                                            | 5.152061000   | -4.830275000 | -0.419607000 | 6                                         | -6.380953000 | -3.544613000 | 0.436358000  |
| 1                                            | 2.377054000   | -3.298998000 | -1.693656000 | 1                                         | -3.397306000 | -2.428463000 | 1.668901000  |
| 6                                            | 4.007429000   | -4.631352000 | -1.198457000 | 6                                         | -5.208248000 | -3.511673000 | 1.197985000  |
| 1                                            | 3.698380000   | -5.389240000 | -1.921978000 | 1                                         | -5.000460000 | -4.305980000 | 1.918663000  |
| 1                                            | 5.092355000   | -1.910831000 | 1.353476000  | 1                                         | -5.930599000 | -0.661847000 | -1.340119000 |
| 6                                            | -1.352875000  | -1.356653000 | 0.343210000  | 6                                         | 0.561638000  | -0.955739000 | -0.319370000 |
| 6                                            | -0.546890000  | -2.413386000 | 0.822296000  | 6                                         | -0.364382000 | -1.928966000 | -0.757227000 |
| 6                                            | -0.684859000  | -0.268517000 | -0.266194000 | 6                                         | 0.026492000  | 0.231452000  | 0.233475000  |
| 1                                            | -1.026205000  | -3.267507000 | 1.308074000  | 1                                         | 0.010345000  | -2.855272000 | -1.200910000 |
| 1                                            | -1.259759000  | 0.567419000  | -0.668860000 | 1                                         | 0.695978000  | 1.011618000  | 0.600365000  |



|                                                         |              |              |              |                                                                       |              |              |              |
|---------------------------------------------------------|--------------|--------------|--------------|-----------------------------------------------------------------------|--------------|--------------|--------------|
| 6                                                       | 0.837008000  | -2.392797000 | 0.712844000  | 6                                                                     | -1.735913000 | -1.738978000 | -0.659794000 |
| 6                                                       | 0.695194000  | -0.239141000 | -0.387964000 | 6                                                                     | -1.340370000 | 0.431324000  | 0.342167000  |
| 1                                                       | 1.424628000  | -3.221604000 | 1.108207000  | 1                                                                     | -2.416247000 | -2.508853000 | -1.024135000 |
| 1                                                       | 1.175953000  | 0.609050000  | -0.875886000 | 1                                                                     | -1.716857000 | 1.354067000  | 0.784071000  |
| 6                                                       | 1.491232000  | -1.301576000 | 0.101928000  | 6                                                                     | -2.257555000 | -0.550763000 | -0.102853000 |
| 6                                                       | 3.591382000  | -0.022161000 | -0.003660000 | 6                                                                     | -4.171678000 | 0.990638000  | -0.044647000 |
| 6                                                       | 4.563707000  | 0.260775000  | -0.970556000 | 6                                                                     | -5.016121000 | 1.451954000  | 0.974082000  |
| 6                                                       | 3.335776000  | 0.937226000  | 0.989729000  | 6                                                                     | -3.870451000 | 1.848444000  | -1.116030000 |
| 1                                                       | 4.777320000  | -0.472670000 | -1.750113000 | 1                                                                     | -5.258451000 | 0.794697000  | 1.810907000  |
| 1                                                       | 2.589418000  | 0.731504000  | 1.759217000  | 1                                                                     | -3.219363000 | 1.496313000  | -1.918244000 |
| 6                                                       | 5.262767000  | 1.470781000  | -0.942085000 | 6                                                                     | -5.553642000 | 2.738874000  | 0.922776000  |
| 6                                                       | 4.028963000  | 2.145421000  | 0.996090000  | 6                                                                     | -4.388412000 | 3.139923000  | -1.161991000 |
| 1                                                       | 6.010409000  | 1.645498000  | -1.715399000 | 1                                                                     | -6.214140000 | 3.083933000  | 1.723939000  |
| 1                                                       | 3.800629000  | 2.864596000  | 1.785415000  | 1                                                                     | -4.156360000 | 3.811187000  | -1.990383000 |
| 6                                                       | 5.013134000  | 2.447289000  | 0.034887000  | 6                                                                     | -5.238742000 | 3.593079000  | -0.142702000 |
| 1                                                       | 5.737608000  | -5.745844000 | -0.524787000 | 8                                                                     | -5.724463000 | 4.863015000  | -0.245764000 |
| 6                                                       | 5.758871000  | 3.793557000  | 0.088430000  | 1                                                                     | -6.291066000 | 5.045891000  | 0.518236000  |
| 6                                                       | 4.740411000  | 4.950474000  | -0.038091000 | 1                                                                     | -7.090205000 | -4.366706000 | 0.551391000  |
| 1                                                       | 4.195783000  | 4.894405000  | -0.994378000 |                                                                       |              |              |              |
| 1                                                       | 3.996433000  | 4.933679000  | 0.773294000  |                                                                       |              |              |              |
| 1                                                       | 5.257622000  | 5.923470000  | 0.003769000  |                                                                       |              |              |              |
| 6                                                       | 6.505795000  | 3.913772000  | 1.437372000  |                                                                       |              |              |              |
| 1                                                       | 5.816817000  | 3.864098000  | 2.294717000  |                                                                       |              |              |              |
| 1                                                       | 7.244904000  | 3.104658000  | 1.552905000  |                                                                       |              |              |              |
| 1                                                       | 7.041045000  | 4.876153000  | 1.495184000  |                                                                       |              |              |              |
| 6                                                       | 6.789755000  | 3.934075000  | -1.046188000 |                                                                       |              |              |              |
| 1                                                       | 7.296429000  | 4.908978000  | -0.968508000 |                                                                       |              |              |              |
| 1                                                       | 7.565668000  | 3.153767000  | -0.996472000 |                                                                       |              |              |              |
| 1                                                       | 6.317082000  | 3.885866000  | -2.039982000 |                                                                       |              |              |              |
| D3-OCH <sub>3</sub><br>E(RB3LYP) = -1377.34438563 a. u. |              |              |              | D3-OC <sub>2</sub> H <sub>5</sub><br>E(RB3LYP) = -1416.66453642 a. u. |              |              |              |
| 6                                                       | 7.069299000  | -0.275280000 | -0.140362000 | 6                                                                     | 7.330900000  | -0.074721000 | -0.141137000 |
| 6                                                       | 8.168899000  | 0.496684000  | 0.141904000  | 6                                                                     | 8.383665000  | 0.759382000  | 0.143180000  |
| 6                                                       | 8.044961000  | 1.815402000  | 0.679043000  | 6                                                                     | 8.182871000  | 2.068327000  | 0.680975000  |
| 7                                                       | 7.904434000  | 2.886833000  | 1.116646000  | 7                                                                     | 7.980009000  | 3.129546000  | 1.119025000  |
| 6                                                       | 9.515215000  | -0.068522000 | -0.123725000 | 6                                                                     | 9.760758000  | 0.273244000  | -0.120766000 |
| 8                                                       | 9.723818000  | -1.176106000 | -0.577582000 | 8                                                                     | 10.033879000 | -0.820077000 | -0.575013000 |
| 8                                                       | 10.507266000 | 0.792419000  | 0.197291000  | 8                                                                     | 10.700913000 | 1.189862000  | 0.202453000  |
| 1                                                       | 11.338592000 | 0.329985000  | -0.012718000 | 1                                                                     | 11.557870000 | 0.776349000  | -0.006538000 |

|   |              |              |              |   |              |              |              |
|---|--------------|--------------|--------------|---|--------------|--------------|--------------|
| 6 | 3.285715000  | -0.443794000 | -0.104739000 | 6 | 3.563486000  | -0.462359000 | -0.109506000 |
| 1 | 3.043027000  | 0.544088000  | 0.299138000  | 1 | 3.263591000  | 0.509615000  | 0.294532000  |
| 1 | 7.291828000  | -1.266658000 | -0.547607000 | 1 | 7.610952000  | -1.051284000 | -0.548692000 |
| 6 | 4.672661000  | -0.753342000 | -0.267925000 | 6 | 4.966108000  | -0.690808000 | -0.271728000 |
| 6 | 5.704943000  | 0.091040000  | 0.045185000  | 6 | 5.947453000  | 0.211854000  | 0.042834000  |
| 1 | 4.917137000  | -1.742533000 | -0.674606000 | 1 | 5.267930000  | -1.663978000 | -0.678554000 |
| 1 | 5.485326000  | 1.083129000  | 0.452522000  | 1 | 5.670247000  | 1.189316000  | 0.450411000  |
| 6 | 2.289591000  | -1.318578000 | -0.429727000 | 6 | 2.619946000  | -1.393563000 | -0.434924000 |
| 1 | 2.593572000  | -2.292154000 | -0.832952000 | 1 | 2.980156000  | -2.347868000 | -0.837923000 |
| 7 | -3.371013000 | -0.697628000 | -0.030607000 | 7 | -3.066825000 | -1.104499000 | -0.031367000 |
| 6 | -5.399533000 | -1.940442000 | -0.632531000 | 6 | -5.022355000 | -2.462120000 | -0.626494000 |
| 6 | -4.231262000 | -1.822841000 | 0.139074000  | 6 | -3.859844000 | -2.277605000 | 0.140593000  |
| 6 | -6.256336000 | -3.027165000 | -0.449251000 | 6 | -5.814343000 | -3.596606000 | -0.440470000 |
| 1 | -7.160508000 | -3.105157000 | -1.057368000 | 1 | -6.714880000 | -3.726262000 | -1.045177000 |
| 6 | -3.939618000 | -2.811101000 | 1.095341000  | 6 | -3.508118000 | -3.247801000 | 1.095361000  |
| 6 | -5.957868000 | -4.016234000 | 0.493240000  | 6 | -5.455810000 | -4.567075000 | 0.500224000  |
| 1 | -3.041458000 | -2.718082000 | 1.708157000  | 1 | -2.614589000 | -3.103082000 | 1.704889000  |
| 6 | -4.794434000 | -3.902102000 | 1.261090000  | 6 | -4.297934000 | -4.386262000 | 1.263778000  |
| 1 | -4.554759000 | -4.661692000 | 2.008800000  | 1 | -4.011974000 | -5.130876000 | 2.010287000  |
| 1 | -5.631899000 | -1.173888000 | -1.373434000 | 1 | -5.301585000 | -1.709965000 | -1.365937000 |
| 6 | 0.857578000  | -1.124941000 | -0.310041000 | 6 | 1.179179000  | -1.283640000 | -0.315221000 |
| 6 | -0.018708000 | -2.154683000 | -0.720440000 | 6 | 0.364310000  | -2.363513000 | -0.723440000 |
| 6 | 0.263400000  | 0.052714000  | 0.201435000  | 6 | 0.517389000  | -0.141867000 | 0.194680000  |
| 1 | 0.402215000  | -3.075981000 | -1.131989000 | 1 | 0.838137000  | -3.259205000 | -1.134024000 |
| 1 | 0.892978000  | 0.875136000  | 0.546029000  | 1 | 1.097982000  | 0.716685000  | 0.537172000  |
| 6 | -1.398171000 | -2.027027000 | -0.635576000 | 6 | -1.020145000 | -2.316851000 | -0.637241000 |
| 6 | -1.111988000 | 0.190935000  | 0.297191000  | 6 | -0.863612000 | -0.084251000 | 0.291461000  |
| 1 | -2.039110000 | -2.839637000 | -0.977858000 | 1 | -1.612660000 | -3.166191000 | -0.977590000 |
| 1 | -1.534567000 | 1.108305000  | 0.707438000  | 1 | -1.338898000 | 0.807540000  | 0.700369000  |
| 6 | -1.979015000 | -0.847489000 | -0.119941000 | 6 | -1.668734000 | -1.172624000 | -0.122589000 |
| 6 | -3.963418000 | 0.603107000  | -0.116141000 | 6 | -3.734259000 | 0.159700000  | -0.116646000 |
| 6 | -4.835546000 | 1.053941000  | 0.880223000  | 6 | -4.624812000 | 0.562435000  | 0.883989000  |
| 6 | -3.694389000 | 1.443764000  | -1.211556000 | 6 | -3.521115000 | 1.011351000  | -1.215633000 |
| 1 | -5.053133000 | 0.409870000  | 1.734123000  | 1 | -4.799442000 | -0.090671000 | 1.740928000  |
| 1 | -3.021377000 | 1.101373000  | -1.999785000 | 1 | -2.834240000 | 0.706480000  | -2.007341000 |
| 6 | -5.438424000 | 2.313164000  | 0.794835000  | 6 | -5.300039000 | 1.784370000  | 0.799586000  |
| 6 | -4.274396000 | 2.703570000  | -1.294737000 | 6 | -4.173809000 | 2.235166000  | -1.297950000 |
| 1 | -6.115341000 | 2.629983000  | 1.587518000  | 1 | -5.989012000 | 2.063068000  | 1.596014000  |
| 1 | -4.071239000 | 3.363710000  | -2.139620000 | 1 | -4.014196000 | 2.903351000  | -2.145866000 |
| 6 | -5.155606000 | 3.150470000  | -0.294103000 | 6 | -5.073595000 | 2.634488000  | -0.293331000 |
| 8 | -5.676088000 | 4.395994000  | -0.477060000 | 8 | -5.665981000 | 3.846225000  | -0.476018000 |

|                                                        |              |              |              |                                                                         |              |              |              |
|--------------------------------------------------------|--------------|--------------|--------------|-------------------------------------------------------------------------|--------------|--------------|--------------|
| 6                                                      | -6.568776000 | 4.903415000  | 0.502953000  | 6                                                                       | -6.588961000 | 4.319949000  | 0.507014000  |
| 1                                                      | -7.472992000 | 4.275501000  | 0.595839000  | 1                                                                       | -6.085328000 | 4.392383000  | 1.489068000  |
| 1                                                      | -6.084333000 | 4.986826000  | 1.492253000  | 1                                                                       | -7.427165000 | 3.605404000  | 0.608663000  |
| 1                                                      | -6.858676000 | 5.904350000  | 0.157984000  | 6                                                                       | -7.084628000 | 5.678243000  | 0.048520000  |
| 1                                                      | -6.627843000 | -4.867367000 | 0.630367000  | 1                                                                       | -7.585559000 | 5.599472000  | -0.928629000 |
|                                                        |              |              |              | 1                                                                       | -6.246378000 | 6.385172000  | -0.048829000 |
|                                                        |              |              |              | 1                                                                       | -7.802468000 | 6.085636000  | 0.777442000  |
|                                                        |              |              |              | 1                                                                       | -6.074979000 | -5.455530000 | 0.639621000  |
| D3-NH <sub>2</sub><br>E(RB3LYP) = -1318.17672570 a. u. |              |              |              | D3-N(CH <sub>3</sub> ) <sub>2</sub><br>E(RB3LYP) = -1396.78728931 a. u. |              |              |              |
| 6                                                      | 6.840172000  | -0.601923000 | -0.151992000 | 6                                                                       | 7.348366000  | -0.849979000 | -0.169609000 |
| 6                                                      | 8.033511000  | 0.003770000  | 0.155909000  | 6                                                                       | 8.584227000  | -0.347295000 | 0.156355000  |
| 6                                                      | 8.087403000  | 1.308382000  | 0.737092000  | 6                                                                       | 8.737074000  | 0.932509000  | 0.773860000  |
| 7                                                      | 8.091846000  | 2.373824000  | 1.210499000  | 7                                                                       | 8.822481000  | 1.980840000  | 1.276908000  |
| 6                                                      | 9.291386000  | -0.729716000 | -0.128794000 | 6                                                                       | 9.782273000  | -1.167636000 | -0.147513000 |
| 8                                                      | 9.350205000  | -1.839800000 | -0.619574000 | 8                                                                       | 9.756867000  | -2.264935000 | -0.669169000 |
| 8                                                      | 10.390151000 | -0.022820000 | 0.220668000  | 8                                                                       | 10.931547000 | -0.558064000 | 0.222667000  |
| 1                                                      | 11.151405000 | -0.587185000 | -0.005129000 | 1                                                                       | 11.647275000 | -1.173414000 | -0.018262000 |
| 6                                                      | 3.068586000  | -0.260473000 | -0.122863000 | 6                                                                       | 3.614293000  | -0.220295000 | -0.136006000 |
| 1                                                      | 2.958163000  | 0.736990000  | 0.313933000  | 1                                                                       | 3.578769000  | 0.770053000  | 0.328615000  |
| 1                                                      | 6.928191000  | -1.600195000 | -0.592383000 | 1                                                                       | 7.360462000  | -1.839407000 | -0.637736000 |
| 6                                                      | 4.401795000  | -0.747516000 | -0.295902000 | 6                                                                       | 4.906602000  | -0.803053000 | -0.320583000 |
| 6                                                      | 5.537442000  | -0.060981000 | 0.045726000  | 6                                                                       | 6.090827000  | -0.215910000 | 0.041668000  |
| 1                                                      | 4.513125000  | -1.746483000 | -0.735697000 | 1                                                                       | 4.942453000  | -1.794973000 | -0.788148000 |
| 1                                                      | 5.451762000  | 0.937482000  | 0.486324000  | 1                                                                       | 6.080850000  | 0.773508000  | 0.510009000  |
| 6                                                      | 1.965585000  | -0.982973000 | -0.477595000 | 6                                                                       | 2.460407000  | -0.845998000 | -0.513193000 |
| 1                                                      | 2.139137000  | -1.974331000 | -0.913527000 | 1                                                                       | 2.559760000  | -1.834996000 | -0.976925000 |
| 7                                                      | -3.566027000 | 0.356936000  | -0.050798000 | 7                                                                       | -2.954327000 | 0.899845000  | -0.063259000 |
| 6                                                      | -5.596971000 | -0.789592000 | -0.843753000 | 6                                                                       | -5.058614000 | -0.069138000 | -0.904066000 |
| 6                                                      | -4.536976000 | -0.690558000 | 0.069070000  | 6                                                                       | -4.003857000 | -0.073153000 | 0.018236000  |
| 6                                                      | -6.554123000 | -1.793650000 | -0.718927000 | 6                                                                       | -6.091479000 | -0.999091000 | -0.821936000 |
| 1                                                      | -7.372121000 | -1.852648000 | -1.441857000 | 1                                                                       | -6.886477000 | -0.955584000 | -1.564540000 |
| 6                                                      | -4.458024000 | -1.627644000 | 1.110306000  | 6                                                                       | -4.009195000 | -1.047272000 | 1.026018000  |
| 6                                                      | -6.472737000 | -2.745615000 | 0.316525000  | 6                                                                       | -6.110317000 | -1.987708000 | 0.193622000  |
| 1                                                      | -3.643425000 | -1.558224000 | 1.833891000  | 1                                                                       | -3.195940000 | -1.070434000 | 1.754318000  |
| 6                                                      | -5.402783000 | -2.644018000 | 1.227968000  | 6                                                                       | -5.027187000 | -1.993497000 | 1.108197000  |
| 1                                                      | -5.319329000 | -3.367032000 | 2.043812000  | 1                                                                       | -4.980794000 | -2.734681000 | 1.904369000  |

|                                                          |              |              |              |                                                          |              |              |              |
|----------------------------------------------------------|--------------|--------------|--------------|----------------------------------------------------------|--------------|--------------|--------------|
| 1                                                        | -5.674141000 | -0.064778000 | -1.656417000 | 1                                                        | -5.071289000 | 0.677729000  | -1.700387000 |
| 6                                                        | 0.572244000  | -0.604606000 | -0.352272000 | 6                                                        | 1.099842000  | -0.366291000 | -0.380153000 |
| 6                                                        | -0.431705000 | -1.493561000 | -0.797434000 | 6                                                        | 0.032819000  | -1.162310000 | -0.854087000 |
| 6                                                        | 0.137206000  | 0.622968000  | 0.201913000  | 6                                                        | 0.756806000  | 0.874136000  | 0.209282000  |
| 1                                                        | -0.135577000 | -2.449677000 | -1.237402000 | 1                                                        | 0.257378000  | -2.124984000 | -1.321369000 |
| 1                                                        | 0.868955000  | 1.339308000  | 0.580061000  | 1                                                        | 1.539209000  | 1.520679000  | 0.611103000  |
| 6                                                        | -1.782219000 | -1.185898000 | -0.708606000 | 6                                                        | -1.290476000 | -0.755086000 | -0.759799000 |
| 6                                                        | -1.207225000 | 0.940998000  | 0.300660000  | 6                                                        | -0.559669000 | 1.291244000  | 0.313375000  |
| 1                                                        | -2.525761000 | -1.895462000 | -1.071634000 | 1                                                        | -2.084562000 | -1.394624000 | -1.145108000 |
| 1                                                        | -1.503953000 | 1.889150000  | 0.749309000  | 1                                                        | -0.785216000 | 2.245590000  | 0.789425000  |
| 6                                                        | -2.203745000 | 0.044715000  | -0.158277000 | 6                                                        | -1.620001000 | 0.488093000  | -0.175136000 |
| 6                                                        | -4.028062000 | 1.705594000  | -0.066500000 | 6                                                        | -3.312595000 | 2.279481000  | -0.035602000 |
| 6                                                        | -5.010580000 | 2.124599000  | 0.846601000  | 6                                                        | -4.271071000 | 2.740097000  | 0.883027000  |
| 6                                                        | -3.535309000 | 2.624322000  | -1.010200000 | 6                                                        | -2.742086000 | 3.190040000  | -0.942777000 |
| 1                                                        | -5.400125000 | 1.414134000  | 1.577259000  | 1                                                        | -4.721566000 | 2.036344000  | 1.584500000  |
| 1                                                        | -2.784861000 | 2.301886000  | -1.733845000 | 1                                                        | -2.010596000 | 2.836660000  | -1.671358000 |
| 6                                                        | -5.485169000 | 3.436991000  | 0.816036000  | 6                                                        | -4.645057000 | 4.084862000  | 0.894221000  |
| 6                                                        | -4.005239000 | 3.938577000  | -1.023475000 | 6                                                        | -3.111665000 | 4.535697000  | -0.914257000 |
| 1                                                        | -6.247975000 | 3.747522000  | 1.533833000  | 1                                                        | -5.390456000 | 4.427332000  | 1.615779000  |
| 1                                                        | -3.612377000 | 4.640078000  | -1.763109000 | 1                                                        | -2.659287000 | 5.230259000  | -1.625945000 |
| 6                                                        | -4.983290000 | 4.353043000  | -0.113659000 | 6                                                        | -4.065521000 | 4.991714000  | 0.001343000  |
| 7                                                        | -7.386912000 | -3.794611000 | 0.399210000  | 7                                                        | -7.145698000 | -2.904149000 | 0.292671000  |
| 1                                                        | -8.290720000 | -3.611126000 | -0.025689000 | 6                                                        | -8.135498000 | -2.984491000 | -0.765824000 |
| 1                                                        | -7.489349000 | -4.203060000 | 1.323273000  | 1                                                        | -7.698069000 | -3.258884000 | -1.746658000 |
| 1                                                        | -5.353254000 | 5.380159000  | -0.131476000 | 1                                                        | -8.883848000 | -3.742653000 | -0.501521000 |
|                                                          |              |              |              | 1                                                        | -8.666286000 | -2.025616000 | -0.892060000 |
|                                                          |              |              |              | 6                                                        | -7.038238000 | -4.008432000 | 1.228403000  |
|                                                          |              |              |              | 1                                                        | -7.953947000 | -4.611526000 | 1.179565000  |
|                                                          |              |              |              | 1                                                        | -6.176340000 | -4.672196000 | 1.015805000  |
|                                                          |              |              |              | 1                                                        | -6.935046000 | -3.647197000 | 2.265705000  |
|                                                          |              |              |              | 1                                                        | -4.357017000 | 6.043829000  | 0.016200000  |
| D3-PhCH <sub>3</sub><br>E(RB3LYP) = -1533.20535533 a. u. |              |              |              | D3-PhNH <sub>2</sub><br>E(RB3LYP) = -1549.24808161 a. u. |              |              |              |
| 6                                                        | 8.177233000  | -1.408663000 | -0.177636000 | 6                                                        | 8.173025000  | -1.403549000 | -0.176926000 |
| 6                                                        | 9.450725000  | -1.094811000 | 0.226183000  | 6                                                        | 9.449587000  | -1.085777000 | 0.215170000  |
| 6                                                        | 9.733193000  | 0.091053000  | 0.972574000  | 6                                                        | 9.737835000  | 0.109907000  | 0.943334000  |
| 7                                                        | 9.925100000  | 1.067394000  | 1.580029000  | 7                                                        | 9.934555000  | 1.094316000  | 1.536129000  |
| 6                                                        | 10.553395000 | -2.022921000 | -0.130265000 | 6                                                        | 10.548707000 | -2.019942000 | -0.134616000 |
| 8                                                        | 10.414407000 | -3.052482000 | -0.759922000 | 8                                                        | 10.405324000 | -3.058256000 | -0.749001000 |

|   |              |              |              |   |              |              |              |
|---|--------------|--------------|--------------|---|--------------|--------------|--------------|
| 8 | 11.752110000 | -1.596536000 | 0.326652000  | 8 | 11.750984000 | -1.588920000 | 0.309149000  |
| 1 | 12.399142000 | -2.267449000 | 0.043202000  | 1 | 12.394956000 | -2.264912000 | 0.030940000  |
| 6 | 4.548025000  | -0.323445000 | -0.163568000 | 6 | 4.544696000  | -0.316733000 | -0.158931000 |
| 1 | 4.620218000  | 0.613392000  | 0.397720000  | 1 | 4.619460000  | 0.628120000  | 0.388405000  |
| 1 | 8.086882000  | -2.341929000 | -0.742437000 | 1 | 8.078558000  | -2.344533000 | -0.728113000 |
| 6 | 5.765485000  | -1.044415000 | -0.378232000 | 6 | 5.760594000  | -1.040581000 | -0.369476000 |
| 6 | 6.997673000  | -0.646884000 | 0.067711000  | 6 | 6.995818000  | -0.637593000 | 0.064158000  |
| 1 | 5.695440000  | -1.982682000 | -0.942396000 | 1 | 5.687397000  | -1.986779000 | -0.919901000 |
| 1 | 7.091509000  | 0.285894000  | 0.632973000  | 1 | 7.093285000  | 0.303013000  | 0.615665000  |
| 6 | 3.340076000  | -0.758034000 | -0.625589000 | 6 | 3.334107000  | -0.758179000 | -0.608646000 |
| 1 | 3.329699000  | -1.701963000 | -1.183775000 | 1 | 3.321617000  | -1.710107000 | -1.153125000 |
| 7 | -1.823551000 | 1.624826000  | -0.111950000 | 7 | -1.828271000 | 1.626817000  | -0.105199000 |
| 6 | -4.116958000 | 1.128246000  | -0.840435000 | 6 | -4.103674000 | 1.097223000  | -0.870788000 |
| 6 | -2.993112000 | 0.810432000  | -0.060979000 | 6 | -2.997093000 | 0.807583000  | -0.057448000 |
| 6 | -5.266621000 | 0.343617000  | -0.775232000 | 6 | -5.250398000 | 0.307787000  | -0.810925000 |
| 1 | -6.115741000 | 0.598300000  | -1.412666000 | 1 | -6.084045000 | 0.538540000  | -1.477237000 |
| 6 | -3.053036000 | -0.312551000 | 0.781036000  | 6 | -3.071072000 | -0.290800000 | 0.814396000  |
| 6 | -5.338168000 | -0.790925000 | 0.055364000  | 6 | -5.338704000 | -0.802722000 | 0.051574000  |
| 1 | -2.195961000 | -0.560869000 | 1.409355000  | 1 | -2.226634000 | -0.516783000 | 1.468049000  |
| 6 | -4.202009000 | -1.098874000 | 0.828547000  | 6 | -4.218093000 | -1.080281000 | 0.859846000  |
| 1 | -4.231348000 | -1.949321000 | 1.512733000  | 1 | -4.258961000 | -1.909273000 | 1.569340000  |
| 1 | -4.082540000 | 1.992022000  | -1.506392000 | 1 | -4.057331000 | 1.941985000  | -1.560272000 |
| 6 | 2.044963000  | -0.121938000 | -0.472247000 | 6 | 2.039922000  | -0.120986000 | -0.458435000 |
| 6 | 0.903533000  | -0.728152000 | -1.042460000 | 6 | 0.895772000  | -0.735666000 | -1.014404000 |
| 6 | 1.843772000  | 1.091661000  | 0.226442000  | 6 | 1.840857000  | 1.102385000  | 0.224092000  |
| 1 | 1.021008000  | -1.662006000 | -1.598600000 | 1 | 1.011027000  | -1.677567000 | -1.557355000 |
| 1 | 2.688815000  | 1.594442000  | 0.700230000  | 1 | 2.687667000  | 1.611920000  | 0.687478000  |
| 6 | -0.361055000 | -0.164791000 | -0.934700000 | 6 | -0.368489000 | -0.171835000 | -0.908772000 |
| 6 | 0.585629000  | 1.660168000  | 0.347158000  | 6 | 0.583388000  | 1.672254000  | 0.342069000  |
| 1 | -1.215747000 | -0.655863000 | -1.400535000 | 1 | -1.225215000 | -0.670523000 | -1.362462000 |
| 1 | 0.464465000  | 2.589213000  | 0.904832000  | 1 | 0.464739000  | 2.608641000  | 0.887771000  |
| 6 | -0.548097000 | 1.045317000  | -0.233973000 | 6 | -0.553494000 | 1.049139000  | -0.225498000 |
| 6 | -1.974039000 | 3.043546000  | -0.046034000 | 6 | -1.986198000 | 3.043974000  | -0.037035000 |
| 6 | -2.796119000 | 3.620883000  | 0.935534000  | 6 | -2.827275000 | 3.613768000  | 0.933013000  |
| 6 | -1.316668000 | 3.874618000  | -0.968679000 | 6 | -1.320858000 | 3.882447000  | -0.947615000 |
| 1 | -3.307237000 | 2.977344000  | 1.653461000  | 1 | -3.346005000 | 2.964899000  | 1.640523000  |
| 1 | -0.686088000 | 3.428543000  | -1.739667000 | 1 | -0.676514000 | 3.443019000  | -1.710963000 |
| 6 | -2.957584000 | 5.006543000  | 0.988470000  | 6 | -2.998139000 | 4.998159000  | 0.987428000  |
| 6 | -1.471068000 | 5.260290000  | -0.898188000 | 6 | -1.485289000 | 5.266784000  | -0.875578000 |
| 1 | -3.599411000 | 5.442814000  | 1.757237000  | 1 | -3.654705000 | 5.427959000  | 1.747414000  |
| 1 | -0.954169000 | 5.895091000  | -1.621473000 | 1 | -0.962025000 | 5.906798000  | -1.589709000 |

|   |               |              |              |   |               |              |              |
|---|---------------|--------------|--------------|---|---------------|--------------|--------------|
| 6 | -2.293636000  | 5.833610000  | 0.076904000  | 6 | -2.325831000  | 5.832425000  | 0.088650000  |
| 6 | -6.562665000  | -1.628088000 | 0.115807000  | 6 | -6.559299000  | -1.642251000 | 0.108019000  |
| 6 | -7.845717000  | -1.053036000 | 0.031163000  | 6 | -7.843063000  | -1.086283000 | -0.052197000 |
| 6 | -6.486462000  | -3.024353000 | 0.260005000  | 6 | -6.487901000  | -3.031606000 | 0.325845000  |
| 1 | -7.945746000  | 0.031291000  | -0.053758000 | 1 | -7.949291000  | -0.008443000 | -0.193519000 |
| 1 | -5.509243000  | -3.510396000 | 0.301781000  | 1 | -5.512083000  | -3.510941000 | 0.430889000  |
| 6 | -8.993974000  | -1.840374000 | 0.088392000  | 6 | -8.992699000  | -1.869198000 | 0.002000000  |
| 6 | -7.640337000  | -3.808833000 | 0.317206000  | 6 | -7.630575000  | -3.824608000 | 0.379829000  |
| 1 | -9.974637000  | -1.359666000 | 0.029091000  | 1 | -9.973498000  | -1.400481000 | -0.117116000 |
| 1 | -7.544617000  | -4.893027000 | 0.421130000  | 1 | -7.535184000  | -4.902794000 | 0.535293000  |
| 6 | -8.916457000  | -3.235503000 | 0.232618000  | 6 | -8.909869000  | -3.258229000 | 0.218632000  |
| 6 | -10.167801000 | -4.077406000 | 0.293172000  | 7 | -10.052554000 | -4.056553000 | 0.209369000  |
| 1 | -10.769055000 | -3.968669000 | -0.625368000 | 1 | -10.914783000 | -3.573328000 | 0.442325000  |
| 1 | -9.931287000  | -5.144688000 | 0.415407000  | 1 | -9.969406000  | -4.930371000 | 0.720059000  |
| 1 | -10.812557000 | -3.776489000 | 1.136165000  | 1 | -2.457388000  | 6.915193000  | 0.137759000  |
| 1 | -2.417474000  | 6.917360000  | 0.124954000  |   |               |              |              |

**Table S12.** Cartesian coordinates (in Angstrom unit) of B3LYP/cc-pVDZ optimized geometries of carbazol based D- $\pi$ -A systems.

| D4<br>E(RB3LYP) = -1030.57760506 a. u. | D4-CH <sub>3</sub><br>E(RB3LYP) = -1069.89531958 a. u. |              |              |   |              |              |              |
|----------------------------------------|--------------------------------------------------------|--------------|--------------|---|--------------|--------------|--------------|
| 6                                      | -5.150890000                                           | -0.476250000 | 0.000073000  | 6 | -5.601120000 | -0.487101000 | 0.000050000  |
| 6                                      | -6.364139000                                           | 0.162248000  | 0.000082000  | 6 | -6.819223000 | 0.142827000  | 0.000093000  |
| 6                                      | -6.465597000                                           | 1.588293000  | 0.000079000  | 6 | -6.930963000 | 1.568046000  | 0.000094000  |
| 7                                      | -6.510395000                                           | 2.753065000  | 0.000064000  | 7 | -6.983431000 | 2.732532000  | 0.000098000  |
| 6                                      | -7.598148000                                           | -0.665882000 | 0.000100000  | 6 | -8.046951000 | -0.693958000 | 0.000145000  |
| 8                                      | -7.614119000                                           | -1.880162000 | -0.000040000 | 8 | -8.054659000 | -1.908441000 | 0.000159000  |
| 8                                      | -8.720420000                                           | 0.086325000  | -0.000064000 | 8 | -9.174945000 | 0.050001000  | 0.000195000  |
| 1                                      | -9.464481000                                           | -0.542732000 | -0.000170000 | 1 | -9.914021000 | -0.584820000 | 0.000234000  |
| 6                                      | -1.389875000                                           | -0.012716000 | 0.000050000  | 6 | -1.843341000 | 0.000262000  | -0.000099000 |
| 1                                      | -1.322073000                                           | 1.079252000  | 0.000042000  | 1 | -1.781801000 | 1.092633000  | -0.000097000 |
| 1                                      | -5.201575000                                           | -1.569604000 | 0.000078000  | 1 | -5.644198000 | -1.580820000 | 0.000057000  |
| 6                                      | -2.706010000                                           | -0.580125000 | 0.000061000  | 6 | -3.155668000 | -0.574910000 | -0.000046000 |
| 6                                      | -3.866016000                                           | 0.144728000  | 0.000065000  | 6 | -4.320776000 | 0.142399000  | -0.000001000 |
| 1                                      | -2.776500000                                           | -1.674789000 | 0.000066000  | 1 | -3.219374000 | -1.670052000 | -0.000040000 |
| 1                                      | -3.819306000                                           | 1.238379000  | 0.000060000  | 1 | -4.281265000 | 1.236361000  | -0.000002000 |
| 6                                      | 2.141065000                                            | -1.296694000 | -0.000029000 | 6 | 1.695184000  | -1.265023000 | -0.000249000 |
| 6                                      | 3.471949000                                            | -0.882467000 | -0.000046000 | 6 | 3.023348000  | -0.843932000 | -0.000261000 |
| 6                                      | 3.830269000                                            | 0.495580000  | 0.000004000  | 6 | 3.375218000  | 0.536488000  | -0.000239000 |

|                                                                       |              |              |              |                                                  |               |              |              |
|-----------------------------------------------------------------------|--------------|--------------|--------------|--------------------------------------------------|---------------|--------------|--------------|
| 6                                                                     | 2.809130000  | 1.461474000  | 0.000073000  | 6                                                | 2.348537000   | 1.496843000  | -0.000291000 |
| 6                                                                     | 1.482493000  | 1.056426000  | 0.000088000  | 6                                                | 1.024019000   | 1.084611000  | -0.000257000 |
| 6                                                                     | 1.123915000  | -0.321011000 | 0.000036000  | 6                                                | 0.672273000   | -0.294605000 | -0.000207000 |
| 7                                                                     | 4.633398000  | -1.637992000 | -0.000106000 | 7                                                | 4.189618000   | -1.592986000 | -0.000563000 |
| 6                                                                     | 5.276441000  | 0.551186000  | -0.000029000 | 6                                                | 4.820139000   | 0.597646000  | -0.000128000 |
| 1                                                                     | 1.880932000  | -2.358040000 | -0.000067000 | 1                                                | 1.440601000   | -2.327789000 | -0.000269000 |
| 1                                                                     | 3.055605000  | 2.525319000  | 0.000117000  | 1                                                | 2.589232000   | 2.562060000  | -0.000319000 |
| 1                                                                     | 0.698833000  | 1.814528000  | 0.000148000  | 1                                                | 0.236324000   | 1.838627000  | -0.000267000 |
| 6                                                                     | -0.259826000 | -0.773559000 | 0.000046000  | 6                                                | -0.708521000  | -0.754204000 | -0.000148000 |
| 1                                                                     | -0.391869000 | -1.862077000 | 0.000047000  | 1                                                | -0.834767000  | -1.843482000 | -0.000138000 |
| 6                                                                     | 7.098987000  | -1.112258000 | -0.000146000 | 6                                                | 6.651374000   | -1.057304000 | 0.000115000  |
| 6                                                                     | 8.006610000  | -0.053540000 | -0.000124000 | 6                                                | 7.577317000   | -0.010549000 | 0.000296000  |
| 6                                                                     | 5.735427000  | -0.797089000 | -0.000098000 | 6                                                | 5.286412000   | -0.745550000 | -0.000090000 |
| 1                                                                     | 9.077112000  | -0.269904000 | -0.000160000 | 6                                                | 7.116901000   | 1.329993000  | 0.000186000  |
| 6                                                                     | 7.572001000  | 1.287401000  | -0.000056000 | 1                                                | 7.852353000   | 2.138292000  | 0.000285000  |
| 1                                                                     | 8.311340000  | 2.090556000  | -0.000040000 | 6                                                | 5.762060000   | 1.640092000  | -0.000024000 |
| 6                                                                     | 6.213990000  | 1.596523000  | -0.000008000 | 1                                                | 5.435473000   | 2.682460000  | -0.000094000 |
| 1                                                                     | 5.882461000  | 2.637194000  | 0.000045000  | 1                                                | 6.989751000   | -2.096517000 | 0.000144000  |
| 1                                                                     | 7.442272000  | -2.149058000 | -0.000199000 | 1                                                | 4.233823000   | -2.602211000 | 0.001291000  |
| 1                                                                     | 4.671876000  | -2.647449000 | -0.000154000 | 6                                                | 9.060746000   | -0.291710000 | 0.000637000  |
|                                                                       |              |              |              | 1                                                | 9.549290000   | 0.147251000  | 0.886962000  |
|                                                                       |              |              |              | 1                                                | 9.270480000   | -1.371446000 | 0.000238000  |
|                                                                       |              |              |              | 1                                                | 9.549832000   | 0.147987000  | -0.885020000 |
| D4-C <sub>5</sub> H <sub>11</sub><br>E(RB3LYP) = -1227.15157794 a. u. |              |              |              | D4-isopropyl<br>E(RB3LYP) = -1148.52265162 a. u. |               |              |              |
| 6                                                                     | 7.359206000  | -0.769040000 | -0.000026000 | 6                                                | -6.406066000  | -0.541602000 | 0.000006000  |
| 6                                                                     | 8.631642000  | -0.257419000 | 0.000088000  | 6                                                | -7.638718000  | 0.059220000  | 0.000034000  |
| 6                                                                     | 8.877976000  | 1.150776000  | 0.000259000  | 6                                                | -7.784286000  | 1.481392000  | 0.000061000  |
| 7                                                                     | 9.040661000  | 2.305047000  | 0.000398000  | 7                                                | -7.864433000  | 2.644295000  | 0.000083000  |
| 6                                                                     | 9.774416000  | -1.206750000 | 0.000030000  | 6                                                | -8.846299000  | -0.806513000 | 0.000037000  |
| 8                                                                     | 9.667121000  | -2.416550000 | -0.000114000 | 8                                                | -8.825095000  | -2.020811000 | 0.000016000  |
| 8                                                                     | 10.967967000 | -0.573130000 | 0.000156000  | 8                                                | -9.991568000  | -0.089511000 | 0.000066000  |
| 1                                                                     | 11.643374000 | -1.275301000 | 0.000105000  | 1                                                | -10.715453000 | -0.741608000 | 0.000065000  |
| 6                                                                     | 3.664482000  | 0.071576000  | -0.000079000 | 6                                                | -2.660911000  | 0.035241000  | -0.000034000 |
| 1                                                                     | 3.706439000  | 1.164871000  | 0.000047000  | 1                                                | -2.625469000  | 1.128770000  | -0.000019000 |
| 1                                                                     | 7.298497000  | -1.861924000 | -0.000154000 | 1                                                | -6.423111000  | -1.636033000 | -0.000012000 |
| 6                                                                     | 4.916443000  | -0.625019000 | -0.000110000 | 6                                                | -3.959216000  | -0.571129000 | -0.000027000 |
| 6                                                                     | 6.144326000  | -0.021203000 | 0.000007000  | 6                                                | -5.141001000  | 0.118233000  | 0.000000000  |
| 1                                                                     | 4.876318000  | -1.721290000 | -0.000235000 | 1                                                | -3.996771000  | -1.667472000 | -0.000044000 |

|   |               |              |              |   |              |              |              |
|---|---------------|--------------|--------------|---|--------------|--------------|--------------|
| 1 | 6.208524000   | 1.071589000  | 0.000132000  | 1 | -5.127562000 | 1.212827000  | 0.000017000  |
| 6 | 0.022182000   | -0.853912000 | -0.000136000 | 6 | 0.906711000  | -1.145415000 | -0.000103000 |
| 6 | -1.260319000  | -0.309405000 | -0.000102000 | 6 | 2.224626000  | -0.693159000 | -0.000104000 |
| 6 | -1.480299000  | 1.098362000  | -0.000111000 | 6 | 2.543063000  | 0.695146000  | -0.000076000 |
| 6 | -0.367348000  | 1.957422000  | -0.000155000 | 6 | 1.494347000  | 1.630893000  | -0.000060000 |
| 6 | 0.912249000   | 1.421928000  | -0.000182000 | 6 | 0.179678000  | 1.187601000  | -0.000053000 |
| 6 | 1.132226000   | 0.015576000  | -0.000167000 | 6 | -0.138943000 | -0.199407000 | -0.000068000 |
| 7 | -2.492087000  | -0.944481000 | -0.000054000 | 7 | 3.407967000  | -1.414817000 | -0.000192000 |
| 6 | -2.912672000  | 1.295071000  | -0.000090000 | 6 | 3.986693000  | 0.791064000  | -0.000054000 |
| 1 | 0.175366000   | -1.935976000 | -0.000131000 | 1 | 0.677259000  | -2.213878000 | -0.000125000 |
| 1 | -0.506353000  | 3.040617000  | -0.000179000 | 1 | 1.710016000  | 2.701456000  | -0.000047000 |
| 1 | 1.767656000   | 2.098170000  | -0.000235000 | 1 | -0.625609000 | 1.922778000  | -0.000033000 |
| 6 | 2.463312000   | -0.572267000 | -0.000188000 | 6 | -1.508500000 | -0.691925000 | -0.000058000 |
| 1 | 2.486140000   | -1.668614000 | -0.000291000 | 1 | -1.608658000 | -1.783899000 | -0.000073000 |
| 6 | -4.892462000  | -0.183975000 | 0.000028000  | 6 | 5.854825000  | -0.822780000 | 0.000000000  |
| 6 | -5.718945000  | 0.942888000  | 0.000028000  | 6 | 6.760676000  | 0.246122000  | 0.000064000  |
| 6 | -3.503959000  | 0.003336000  | -0.000026000 | 6 | 4.485867000  | -0.542134000 | -0.000061000 |
| 6 | -5.131133000  | 2.234702000  | -0.000056000 | 6 | 6.266681000  | 1.571906000  | 0.000053000  |
| 1 | -5.788985000  | 3.107618000  | -0.000074000 | 1 | 6.982549000  | 2.397357000  | 0.000094000  |
| 6 | -3.754940000  | 2.420286000  | -0.000112000 | 6 | 4.902771000  | 1.853052000  | -0.000011000 |
| 1 | -3.334735000  | 3.428563000  | -0.000165000 | 1 | 4.553995000  | 2.888185000  | -0.000016000 |
| 1 | -5.310855000  | -1.191313000 | 0.000047000  | 1 | 6.206967000  | -1.857006000 | -0.000019000 |
| 1 | -2.631711000  | -1.944975000 | -0.000081000 | 1 | 3.475264000  | -2.422735000 | 0.000276000  |
| 6 | -7.234784000  | 0.843778000  | 0.000098000  | 6 | 8.264429000  | -0.005221000 | 0.000136000  |
| 1 | -7.615238000  | 1.399534000  | -0.877162000 | 1 | 8.750926000  | 0.985418000  | 0.000247000  |
| 1 | -7.615170000  | 1.399582000  | 0.877363000  | 6 | 8.724950000  | -0.743612000 | -1.269452000 |
| 6 | -7.843884000  | -0.560172000 | 0.000162000  | 6 | 8.724800000  | -0.743830000 | 1.269646000  |
| 1 | -7.488335000  | -1.120419000 | -0.883872000 | 1 | 8.425635000  | -0.200245000 | 2.179662000  |
| 1 | -7.488418000  | -1.120319000 | 0.884289000  | 1 | 8.290688000  | -1.756305000 | 1.325944000  |
| 6 | -9.376431000  | -0.542762000 | 0.000116000  | 1 | 9.821987000  | -0.852261000 | 1.279966000  |
| 1 | -9.735893000  | 0.019477000  | -0.882432000 | 1 | 8.290836000  | -1.756073000 | -1.325975000 |
| 1 | -9.735927000  | 0.019483000  | 0.882647000  | 1 | 9.822138000  | -0.852044000 | -1.279656000 |
| 6 | -10.006121000 | -1.939763000 | 0.000102000  | 1 | 8.425893000  | -0.199861000 | -2.179404000 |
| 1 | -9.645967000  | -2.500556000 | -0.882292000 |   |              |              |              |
| 1 | -9.645934000  | -2.500591000 | 0.882461000  |   |              |              |              |
| 6 | -11.536200000 | -1.914150000 | 0.000131000  |   |              |              |              |
| 1 | -11.927784000 | -1.390856000 | -            |   |              |              |              |
|   | 0.888874000   |              |              |   |              |              |              |
| 1 | -11.927752000 | -1.390916000 | 0.889185000  |   |              |              |              |
| 1 | -11.957748000 | -2.932143000 | 0.000103000  |   |              |              |              |



| D4-t-but<br>E(RB3LYP) = -1187.83287967 a. u. |              |              |              | D4-OH<br>E(RB3LYP) = -1105.80408310 a. u. |              |              |              |
|----------------------------------------------|--------------|--------------|--------------|-------------------------------------------|--------------|--------------|--------------|
| 6                                            | 6.782666000  | -0.515359000 | 0.000035000  | 6                                         | 5.586918000  | -0.485158000 | -0.000019000 |
| 6                                            | 8.009573000  | 0.097125000  | 0.000304000  | 6                                         | 6.805999000  | 0.143484000  | -0.000005000 |
| 6                                            | 8.141648000  | 1.520614000  | 0.000566000  | 6                                         | 6.919266000  | 1.568518000  | 0.000018000  |
| 7                                            | 8.210780000  | 2.684224000  | 0.000776000  | 7                                         | 6.973080000  | 2.732975000  | 0.000039000  |
| 6                                            | 9.225297000  | -0.757116000 | 0.000317000  | 6                                         | 8.032530000  | -0.694517000 | -0.000016000 |
| 8                                            | 9.215618000  | -1.971564000 | 0.000068000  | 8                                         | 8.039242000  | -1.909121000 | 0.000005000  |
| 8                                            | 10.363729000 | -0.029292000 | 0.000567000  | 8                                         | 9.161626000  | 0.048043000  | 0.000046000  |
| 1                                            | 11.093748000 | -0.674514000 | 0.000530000  | 1                                         | 9.899657000  | -0.587962000 | 0.000070000  |
| 6                                            | 3.032195000  | 0.025805000  | -0.000313000 | 6                                         | 1.829624000  | 0.003439000  | -0.000022000 |
| 1                                            | 2.986288000  | 1.118943000  | -0.000172000 | 1                                         | 1.767939000  | 1.095822000  | -0.000005000 |
| 1                                            | 6.810097000  | -1.609580000 | -0.000152000 | 1                                         | 5.629049000  | -1.578925000 | -0.000037000 |
| 6                                            | 4.336219000  | -0.568153000 | -0.000265000 | 6                                         | 3.141497000  | -0.571589000 | -0.000029000 |
| 6                                            | 5.511396000  | 0.132427000  | -0.000014000 | 6                                         | 4.307363000  | 0.145119000  | -0.000014000 |
| 1                                            | 4.384218000  | -1.664089000 | -0.000444000 | 1                                         | 3.204991000  | -1.666780000 | -0.000046000 |
| 1                                            | 5.487544000  | 1.226842000  | 0.000155000  | 1                                         | 4.268495000  | 1.239104000  | 0.000003000  |
| 6                                            | -0.523933000 | -1.189042000 | -0.000419000 | 6                                         | -1.709626000 | -1.264502000 | 0.000001000  |
| 6                                            | -1.846237000 | -0.749675000 | -0.000451000 | 6                                         | -3.036218000 | -0.843884000 | 0.000010000  |
| 6                                            | -2.177642000 | 0.635718000  | -0.000542000 | 6                                         | -3.391289000 | 0.535392000  | -0.000009000 |
| 6                                            | -1.138165000 | 1.581512000  | -0.000760000 | 6                                         | -2.365227000 | 1.496384000  | -0.000037000 |
| 6                                            | 0.180816000  | 1.150934000  | -0.000760000 | 6                                         | -1.040052000 | 1.084835000  | -0.000047000 |
| 6                                            | 0.512562000  | -0.232920000 | -0.000559000 | 6                                         | -0.685954000 | -0.293133000 | -0.000028000 |
| 7                                            | -3.022429000 | -1.482815000 | -0.000481000 | 7                                         | -4.204257000 | -1.595469000 | 0.000055000  |
| 6                                            | -3.622237000 | 0.717151000  | -0.000486000 | 6                                         | -4.835645000 | 0.594287000  | 0.000011000  |
| 1                                            | -0.284057000 | -2.255212000 | -0.000331000 | 1                                         | -1.454585000 | -2.327195000 | 0.000017000  |
| 1                                            | -1.364333000 | 2.649902000  | -0.000937000 | 1                                         | -2.606181000 | 2.561521000  | -0.000052000 |
| 1                                            | 0.979013000  | 1.893795000  | -0.000971000 | 1                                         | -0.253430000 | 1.840050000  | -0.000072000 |
| 6                                            | 1.886785000  | -0.712341000 | -0.000504000 | 6                                         | 0.694478000  | -0.751314000 | -0.000033000 |
| 1                                            | 1.997383000  | -1.803306000 | -0.000613000 | 1                                         | 0.821537000  | -1.840552000 | -0.000045000 |
| 6                                            | -5.473543000 | -0.913146000 | -0.000076000 | 6                                         | -6.663132000 | -1.068601000 | -0.000008000 |
| 6                                            | -6.401846000 | 0.140106000  | -0.000067000 | 6                                         | -7.573586000 | -0.007078000 | -0.000008000 |
| 6                                            | -4.108761000 | -0.619693000 | -0.000289000 | 6                                         | -5.300330000 | -0.750970000 | 0.000022000  |
| 6                                            | -5.915708000 | 1.470052000  | -0.000362000 | 6                                         | -7.134388000 | 1.336994000  | 0.000029000  |
| 1                                            | -6.619233000 | 2.300855000  | -0.000645000 | 1                                         | -7.890407000 | 2.122953000  | 0.000093000  |
| 6                                            | -4.553094000 | 1.763932000  | -0.000597000 | 6                                         | -5.778858000 | 1.636102000  | 0.000011000  |
| 1                                            | -4.219885000 | 2.804216000  | -0.000895000 | 1                                         | -5.452675000 | 2.678323000  | 0.000017000  |
| 1                                            | -5.805303000 | -1.953326000 | -0.000082000 | 1                                         | -7.008584000 | -2.106177000 | -0.000128000 |
| 1                                            | -3.079813000 | -2.491327000 | 0.000196000  | 1                                         | -4.245893000 | -2.604730000 | 0.000033000  |

|                                                         |              |              |              |                                                                       |              |              |              |
|---------------------------------------------------------|--------------|--------------|--------------|-----------------------------------------------------------------------|--------------|--------------|--------------|
| 6                                                       | -7.909861000 | -0.184990000 | 0.000516000  | 8                                                                     | -8.923060000 | -0.203432000 | -0.000050000 |
| 6                                                       | -8.784402000 | 1.082291000  | 0.000612000  | 1                                                                     | -9.104362000 | -1.154779000 | 0.000528000  |
| 1                                                       | -8.608572000 | 1.704194000  | 0.892373000  |                                                                       |              |              |              |
| 1                                                       | -8.609632000 | 1.703850000  | -0.891603000 |                                                                       |              |              |              |
| 1                                                       | -9.848323000 | 0.797034000  | 0.001168000  |                                                                       |              |              |              |
| 6                                                       | -8.259624000 | -1.008742000 | -1.260859000 |                                                                       |              |              |              |
| 1                                                       | -8.023696000 | -0.445423000 | -2.178024000 |                                                                       |              |              |              |
| 1                                                       | -7.704571000 | -1.958845000 | -1.299223000 |                                                                       |              |              |              |
| 1                                                       | -9.335542000 | -1.250222000 | -1.275564000 |                                                                       |              |              |              |
| 6                                                       | -8.258758000 | -1.007674000 | 1.263166000  |                                                                       |              |              |              |
| 1                                                       | -9.334718000 | -1.248584000 | 1.278047000  |                                                                       |              |              |              |
| 1                                                       | -7.703957000 | -1.957884000 | 1.301571000  |                                                                       |              |              |              |
| 1                                                       | -8.021960000 | -0.443235000 | 2.179308000  |                                                                       |              |              |              |
| D4-OCH <sub>3</sub><br>E(RB3LYP) = -1145.10585530 a. u. |              |              |              | D4-OC <sub>2</sub> H <sub>5</sub><br>E(RB3LYP) = -1184.42598167 a. u. |              |              |              |
| 6                                                       | 6.002656000  | -0.529413000 | -0.000039000 | 6                                                                     | 6.455166000  | -0.565540000 | -0.000055000 |
| 6                                                       | 7.234445000  | 0.074263000  | -0.000061000 | 6                                                                     | 7.694821000  | 0.021964000  | -0.000079000 |
| 6                                                       | 7.376743000  | 1.496668000  | -0.000097000 | 6                                                                     | 7.855736000  | 1.442373000  | -0.000118000 |
| 7                                                       | 7.454170000  | 2.659809000  | -0.000127000 | 7                                                                     | 7.948409000  | 2.604405000  | -0.000149000 |
| 6                                                       | 8.443489000  | -0.788474000 | -0.000045000 | 6                                                                     | 8.892396000  | -0.856489000 | -0.000064000 |
| 8                                                       | 8.425671000  | -2.003022000 | -0.000036000 | 8                                                                     | 8.858782000  | -2.070728000 | -0.000050000 |
| 8                                                       | 9.587660000  | -0.069154000 | -0.000094000 | 8                                                                     | 10.045966000 | -0.152248000 | -0.000110000 |
| 1                                                       | 10.312339000 | -0.720316000 | -0.000098000 | 1                                                                     | 10.761948000 | -0.812954000 | -0.000112000 |
| 6                                                       | 2.255988000  | 0.033994000  | -0.000028000 | 6                                                                     | 2.716121000  | 0.046028000  | -0.000040000 |
| 1                                                       | 2.215674000  | 1.127369000  | -0.000054000 | 1                                                                     | 2.689679000  | 1.139826000  | -0.000067000 |
| 1                                                       | 6.022604000  | -1.623817000 | -0.000011000 | 1                                                                     | 6.460846000  | -1.660114000 | -0.000026000 |
| 6                                                       | 3.556085000  | -0.566747000 | -0.000022000 | 6                                                                     | 4.008362000  | -0.571228000 | -0.000035000 |
| 6                                                       | 4.736231000  | 0.126477000  | -0.000047000 | 6                                                                     | 5.197437000  | 0.106704000  | -0.000062000 |
| 1                                                       | 3.597839000  | -1.663000000 | 0.000005000  | 1                                                                     | 4.036055000  | -1.667934000 | -0.000006000 |
| 1                                                       | 4.719308000  | 1.221021000  | -0.000074000 | 1                                                                     | 5.194670000  | 1.201375000  | -0.000091000 |
| 6                                                       | -1.307099000 | -1.165105000 | 0.000044000  | 6                                                                     | -0.861819000 | -1.108310000 | 0.000039000  |
| 6                                                       | -2.625535000 | -0.719075000 | 0.000044000  | 6                                                                     | -2.174557000 | -0.645946000 | 0.000041000  |
| 6                                                       | -2.953862000 | 0.667315000  | -0.000002000 | 6                                                                     | -2.485596000 | 0.744541000  | -0.000006000 |
| 6                                                       | -1.909028000 | 1.608316000  | -0.000050000 | 6                                                                     | -1.429045000 | 1.672392000  | -0.000057000 |
| 6                                                       | -0.592321000 | 1.171151000  | -0.000050000 | 6                                                                     | -0.117873000 | 1.218864000  | -0.000059000 |
| 6                                                       | -0.264956000 | -0.213744000 | -0.000003000 | 6                                                                     | 0.192198000  | -0.170007000 | -0.000011000 |
| 7                                                       | -3.807641000 | -1.446738000 | 0.000085000  | 7                                                                     | -3.365635000 | -1.358697000 | 0.000085000  |
| 6                                                       | -4.396065000 | 0.753335000  | 0.000013000  | 6                                                                     | -3.926533000 | 0.848502000  | 0.000011000  |
| 1                                                       | -1.072536000 | -2.232530000 | 0.000079000  | 1                                                                     | -0.640556000 | -2.178580000 | 0.000076000  |

|                                                        |               |              |              |                                                                         |               |              |              |
|--------------------------------------------------------|---------------|--------------|--------------|-------------------------------------------------------------------------|---------------|--------------|--------------|
| 1                                                      | -2.129281000  | 2.677941000  | -0.000087000 | 1                                                                       | -1.635948000  | 2.744686000  | -0.000095000 |
| 1                                                      | 0.208954000   | 1.910821000  | -0.000089000 | 1                                                                       | 0.692577000   | 1.948480000  | -0.000100000 |
| 6                                                      | 1.106137000   | -0.698458000 | -0.000001000 | 6                                                                       | 1.557006000   | -0.671817000 | -0.000010000 |
| 1                                                      | 1.212061000   | -1.789972000 | 0.000027000  | 1                                                                       | 1.649206000   | -1.764585000 | 0.000019000  |
| 6                                                      | -6.256005000  | -0.882536000 | 0.000097000  | 6                                                                       | -5.806712000  | -0.764523000 | 0.000100000  |
| 6                                                      | -7.147968000  | 0.195600000  | 0.000069000  | 6                                                                       | -6.686570000  | 0.324122000  | 0.000072000  |
| 6                                                      | -4.887261000  | -0.580136000 | 0.000068000  | 6                                                                       | -4.434492000  | -0.478645000 | 0.000068000  |
| 6                                                      | -6.679079000  | 1.533908000  | 0.000015000  | 6                                                                       | -6.199794000  | 1.656467000  | 0.000015000  |
| 1                                                      | -7.424285000  | 2.330209000  | -0.000004000 | 1                                                                       | -6.934954000  | 2.462077000  | -0.000004000 |
| 6                                                      | -5.322046000  | 1.812843000  | -0.000013000 | 6                                                                       | -4.839600000  | 1.919161000  | -0.000016000 |
| 1                                                      | -4.979149000  | 2.849684000  | -0.000055000 | 1                                                                       | -4.484287000  | 2.951830000  | -0.000060000 |
| 1                                                      | -6.598201000  | -1.916597000 | 0.000139000  | 1                                                                       | -6.160701000  | -1.794505000 | 0.000144000  |
| 1                                                      | -3.869859000  | -2.454960000 | 0.000125000  | 1                                                                       | -3.440527000  | -2.366049000 | 0.000126000  |
| 8                                                      | -8.504083000  | 0.066762000  | 0.000092000  | 8                                                                       | -8.043058000  | 0.212113000  | 0.000097000  |
| 6                                                      | -9.059994000  | -1.237952000 | 0.000145000  | 6                                                                       | -8.633034000  | -1.088140000 | 0.000152000  |
| 1                                                      | -8.764584000  | -1.807081000 | -0.899625000 | 1                                                                       | -8.301285000  | -1.649193000 | 0.893993000  |
| 1                                                      | -8.764564000  | -1.807017000 | 0.899949000  | 1                                                                       | -8.301308000  | -1.649258000 | -0.893656000 |
| 1                                                      | -10.149351000 | -1.103319000 | 0.000152000  | 6                                                                       | -10.139100000 | -0.906146000 | 0.000165000  |
|                                                        |               |              |              | 1                                                                       | -10.462884000 | -0.348618000 | -0.892081000 |
|                                                        |               |              |              | 1                                                                       | -10.462861000 | -0.348552000 | 0.892379000  |
|                                                        |               |              |              | 1                                                                       | -10.639737000 | -1.886945000 | 0.000208000  |
| D4-NH <sub>2</sub><br>E(RB3LYP) = -1085.93813684 a. u. |               |              |              | D4-N(CH <sub>3</sub> ) <sub>2</sub><br>E(RB3LYP) = -1164.54853724 a. u. |               |              |              |
| 6                                                      | 5.592445000   | -0.483041000 | -0.000126000 | 6                                                                       | 6.420738000   | -0.500569000 | 0.003811000  |
| 6                                                      | 6.814115000   | 0.142131000  | 0.001893000  | 6                                                                       | 7.649726000   | 0.110956000  | 0.006941000  |
| 6                                                      | 6.931421000   | 1.566708000  | 0.004135000  | 6                                                                       | 7.782973000   | 1.534054000  | 0.008375000  |
| 7                                                      | 6.988325000   | 2.731096000  | 0.006042000  | 7                                                                       | 7.852983000   | 2.697774000  | 0.009487000  |
| 6                                                      | 8.037458000   | -0.699013000 | 0.001829000  | 6                                                                       | 8.863207000   | -0.743606000 | 0.008889000  |
| 8                                                      | 8.041676000   | -1.913893000 | 0.000324000  | 8                                                                       | 8.854378000   | -1.958607000 | 0.007954000  |
| 8                                                      | 9.169531000   | 0.039932000  | 0.003900000  | 8                                                                       | 10.003890000  | -0.017560000 | 0.011967000  |
| 1                                                      | 9.904657000   | -0.599354000 | 0.003694000  | 1                                                                       | 10.731275000  | -0.665598000 | 0.013047000  |
| 6                                                      | 1.836555000   | 0.010186000  | -0.002270000 | 6                                                                       | 2.670502000   | 0.031053000  | -0.003730000 |
| 1                                                      | 1.774927000   | 1.102575000  | -0.001275000 | 1                                                                       | 2.619384000   | 1.123985000  | -0.003253000 |
| 1                                                      | 5.631941000   | -1.576938000 | -0.001614000 | 1                                                                       | 6.448284000   | -1.594847000 | 0.003040000  |
| 6                                                      | 3.147097000   | -0.565316000 | -0.002102000 | 6                                                                       | 3.974779000   | -0.557187000 | -0.001384000 |
| 6                                                      | 4.315015000   | 0.149526000  | -0.000403000 | 6                                                                       | 5.150577000   | 0.145434000  | 0.001552000  |
| 1                                                      | 3.209569000   | -1.660638000 | -0.003331000 | 1                                                                       | 4.026191000   | -1.653122000 | -0.001976000 |
| 1                                                      | 4.277953000   | 1.243573000  | 0.000872000  | 1                                                                       | 5.125002000   | 1.239811000  | 0.002240000  |
| 6                                                      | -1.703271000  | -1.260346000 | -0.002678000 | 6                                                                       | -0.881475000  | -1.207255000 | -0.011019000 |

|                                                          |              |              |              |                                                          |               |              |              |
|----------------------------------------------------------|--------------|--------------|--------------|----------------------------------------------------------|---------------|--------------|--------------|
| 6                                                        | -3.029590000 | -0.841633000 | -0.002395000 | 6                                                        | -2.203691000  | -0.776965000 | -0.013262000 |
| 6                                                        | -3.386404000 | 0.538435000  | -0.003233000 | 6                                                        | -2.548034000  | 0.606977000  | -0.013738000 |
| 6                                                        | -2.360380000 | 1.499893000  | -0.004021000 | 6                                                        | -1.513088000  | 1.559066000  | -0.011509000 |
| 6                                                        | -1.034725000 | 1.089623000  | -0.004008000 | 6                                                        | -0.191193000  | 1.136824000  | -0.009092000 |
| 6                                                        | -0.679132000 | -0.287902000 | -0.003392000 | 6                                                        | 0.151988000   | -0.243915000 | -0.008844000 |
| 7                                                        | -4.197220000 | -1.593528000 | -0.001277000 | 7                                                        | -3.378134000  | -1.517665000 | -0.015329000 |
| 6                                                        | -4.829280000 | 0.595093000  | -0.003565000 | 6                                                        | -3.989450000  | 0.675411000  | -0.016593000 |
| 1                                                        | -1.447094000 | -2.322842000 | -0.002345000 | 1                                                        | -0.634690000  | -2.272014000 | -0.010749000 |
| 1                                                        | -2.602032000 | 2.564944000  | -0.005017000 | 1                                                        | -1.745237000  | 2.626247000  | -0.011797000 |
| 1                                                        | -0.248743000 | 1.845603000  | -0.004831000 | 1                                                        | 0.601712000   | 1.885580000  | -0.007413000 |
| 6                                                        | 0.700363000  | -0.744605000 | -0.003374000 | 6                                                        | 1.526604000   | -0.712895000 | -0.006386000 |
| 1                                                        | 0.828240000  | -1.833835000 | -0.004134000 | 1                                                        | 1.644489000   | -1.803296000 | -0.006661000 |
| 6                                                        | -6.654414000 | -1.073580000 | 0.001256000  | 6                                                        | -5.827891000  | -0.982849000 | -0.017464000 |
| 6                                                        | -7.585269000 | -0.021780000 | -0.000030000 | 6                                                        | -6.768476000  | 0.073193000  | -0.023892000 |
| 6                                                        | -5.295802000 | -0.750597000 | -0.002650000 | 6                                                        | -4.469748000  | -0.663833000 | -0.017974000 |
| 6                                                        | -7.131024000 | 1.325674000  | -0.002059000 | 6                                                        | -6.290176000  | 1.421363000  | -0.015349000 |
| 1                                                        | -7.871072000 | 2.129621000  | -0.007703000 | 1                                                        | -6.999763000  | 2.246067000  | -0.010594000 |
| 6                                                        | -5.777708000 | 1.631497000  | -0.002990000 | 6                                                        | -4.934332000  | 1.713665000  | -0.013925000 |
| 1                                                        | -5.457487000 | 2.675775000  | -0.001781000 | 1                                                        | -4.610892000  | 2.757066000  | -0.008202000 |
| 1                                                        | -6.991157000 | -2.113268000 | 0.000036000  | 1                                                        | -6.141999000  | -2.025049000 | -0.013531000 |
| 1                                                        | -4.238361000 | -2.602766000 | -0.005409000 | 1                                                        | -3.428531000  | -2.526446000 | -0.017322000 |
| 7                                                        | -8.951485000 | -0.286146000 | -0.062230000 | 7                                                        | -8.127443000  | -0.188245000 | -0.040425000 |
| 1                                                        | -9.549093000 | 0.451159000  | 0.298067000  | 6                                                        | -9.085429000  | 0.897229000  | 0.069146000  |
| 1                                                        | -9.234067000 | -1.197582000 | 0.284317000  | 1                                                        | -8.983651000  | 1.616900000  | -0.761806000 |
|                                                          |              |              |              | 1                                                        | -10.101169000 | 0.484187000  | 0.027078000  |
|                                                          |              |              |              | 1                                                        | -8.984217000  | 1.460280000  | 1.016755000  |
|                                                          |              |              |              | 6                                                        | -8.597968000  | -1.556831000 | 0.045833000  |
|                                                          |              |              |              | 1                                                        | -9.694249000  | -1.567080000 | 0.003220000  |
|                                                          |              |              |              | 1                                                        | -8.224349000  | -2.168048000 | -0.795099000 |
|                                                          |              |              |              | 1                                                        | -8.286441000  | -2.054260000 | 0.985208000  |
| D4-PhCH <sub>3</sub><br>E(RB3LYP) = -1300.96594988 a. u. |              |              |              | D4-PhNH <sub>2</sub><br>E(RB3LYP) = -1317.00868434 a. u. |               |              |              |
| 6                                                        | 7.736937000  | -0.574422000 | 0.058760000  | 6                                                        | 7.731377000   | -0.571620000 | 0.058138000  |
| 6                                                        | 8.973052000  | 0.016808000  | 0.006671000  | 6                                                        | 8.969103000   | 0.017332000  | 0.008097000  |
| 6                                                        | 9.127051000  | 1.432188000  | -0.122822000 | 6                                                        | 9.125994000   | 1.432624000  | -0.118033000 |
| 7                                                        | 9.214076000  | 2.589747000  | -0.228805000 | 7                                                        | 9.215513000   | 2.590288000  | -0.221237000 |
| 6                                                        | 10.175545000 | -0.852314000 | 0.088404000  | 6                                                        | 10.169408000  | -0.854113000 | 0.088514000  |
| 8                                                        | 10.146948000 | -2.061373000 | 0.199095000  | 8                                                        | 10.138979000  | -2.063537000 | 0.196460000  |

|   |              |              |              |   |              |              |              |
|---|--------------|--------------|--------------|---|--------------|--------------|--------------|
| 8 | 11.324964000 | -0.144880000 | 0.025658000  | 8 | 11.320734000 | -0.149051000 | 0.027927000  |
| 1 | 12.045079000 | -0.798293000 | 0.086793000  | 1 | 12.038887000 | -0.804674000 | 0.087967000  |
| 6 | 3.995489000  | 0.022871000  | -0.002224000 | 6 | 3.990796000  | 0.028501000  | -0.003113000 |
| 1 | 3.967391000  | 1.112051000  | -0.101995000 | 1 | 3.962474000  | 1.117864000  | -0.100764000 |
| 1 | 7.747444000  | -1.664359000 | 0.158666000  | 1 | 7.740041000  | -1.661813000 | 0.155607000  |
| 6 | 5.289852000  | -0.589205000 | 0.055998000  | 6 | 5.284511000  | -0.583743000 | 0.054271000  |
| 6 | 6.475840000  | 0.090140000  | -0.004257000 | 6 | 6.471662000  | 0.094584000  | -0.004045000 |
| 1 | 5.320421000  | -1.681174000 | 0.156070000  | 1 | 5.314507000  | -1.675981000 | 0.152084000  |
| 1 | 6.469147000  | 1.180234000  | -0.104134000 | 1 | 6.466178000  | 1.184889000  | -0.101619000 |
| 6 | 0.419861000  | -1.128666000 | 0.096182000  | 6 | 0.415394000  | -1.126180000 | 0.093594000  |
| 6 | -0.894729000 | -0.668860000 | 0.051951000  | 6 | -0.899321000 | -0.667961000 | 0.050060000  |
| 6 | -1.203218000 | 0.716226000  | -0.074370000 | 6 | -1.209667000 | 0.717375000  | -0.074799000 |
| 6 | -0.147393000 | 1.640995000  | -0.156175000 | 6 | -0.154415000 | 1.643062000  | -0.155707000 |
| 6 | 1.163550000  | 1.189930000  | -0.112819000 | 6 | 1.157100000  | 1.193384000  | -0.112994000 |
| 6 | 1.472191000  | -0.193921000 | 0.013326000  | 6 | 1.467379000  | -0.190208000 | 0.011590000  |
| 7 | -2.083206000 | -1.378986000 | 0.113984000  | 7 | -2.087287000 | -1.379011000 | 0.111491000  |
| 6 | -2.644904000 | 0.821931000  | -0.086082000 | 6 | -2.650959000 | 0.821372000  | -0.086334000 |
| 1 | 0.641447000  | -2.194332000 | 0.193372000  | 1 | 0.638202000  | -2.191757000 | 0.189554000  |
| 1 | -0.355149000 | 2.708679000  | -0.253328000 | 1 | -0.363272000 | 2.710654000  | -0.251746000 |
| 1 | 1.974267000  | 1.916252000  | -0.177064000 | 1 | 1.967074000  | 1.920648000  | -0.176650000 |
| 6 | 2.838227000  | -0.693721000 | 0.061366000  | 6 | 2.833210000  | -0.688590000 | 0.058867000  |
| 1 | 2.930829000  | -1.781787000 | 0.160981000  | 1 | 2.926686000  | -1.776818000 | 0.156518000  |
| 6 | -4.524199000 | -0.771848000 | 0.058153000  | 6 | -4.528859000 | -0.774706000 | 0.058895000  |
| 6 | -5.423988000 | 0.301764000  | -0.032932000 | 6 | -5.433138000 | 0.296221000  | -0.033604000 |
| 6 | -3.153982000 | -0.502108000 | 0.030267000  | 6 | -3.159310000 | -0.502938000 | 0.028613000  |
| 6 | -4.918477000 | 1.623581000  | -0.150265000 | 6 | -4.926262000 | 1.618929000  | -0.151509000 |
| 1 | -5.624046000 | 2.449748000  | -0.249991000 | 1 | -5.631644000 | 2.444829000  | -0.254704000 |
| 6 | -3.554073000 | 1.887834000  | -0.177746000 | 6 | -3.562802000 | 1.885581000  | -0.176869000 |
| 1 | -3.196616000 | 2.914962000  | -0.278526000 | 1 | -3.207405000 | 2.913550000  | -0.277305000 |
| 1 | -4.890517000 | -1.793200000 | 0.178467000  | 1 | -4.891470000 | -1.796965000 | 0.182805000  |
| 1 | -2.158548000 | -2.382070000 | 0.207060000  | 1 | -2.161700000 | -2.382292000 | 0.202535000  |
| 6 | -9.139615000 | 0.698380000  | 0.687941000  | 6 | -9.154181000 | 0.719242000  | 0.653162000  |
| 6 | -9.702262000 | -0.414648000 | 0.048385000  | 6 | -9.710899000 | -0.422295000 | 0.044608000  |
| 6 | -8.830551000 | -1.288798000 | -0.621794000 | 6 | -8.835050000 | -1.322424000 | -0.592406000 |
| 6 | -7.763235000 | 0.932864000  | 0.661401000  | 6 | -7.781438000 | 0.946692000  | 0.621262000  |
| 6 | -7.456267000 | -1.060056000 | -0.650167000 | 6 | -7.463391000 | -1.086440000 | -0.615105000 |
| 6 | -6.889661000 | 0.057790000  | -0.007326000 | 6 | -6.896227000 | 0.051770000  | -0.010401000 |
| 1 | -9.789568000 | 1.393926000  | 1.225728000  | 1 | -9.809516000 | 1.431548000  | 1.162075000  |
| 1 | -6.811725000 | -1.745496000 | -1.205026000 | 1 | -6.818388000 | -1.793466000 | -1.141569000 |
| 1 | -9.237920000 | -2.161274000 | -1.140637000 | 1 | -9.240950000 | -2.208752000 | -1.087866000 |
| 1 | -7.358682000 | 1.796949000  | 1.192671000  | 1 | -7.383956000 | 1.828997000  | 1.127339000  |

|   |               |              |             |   |               |              |              |
|---|---------------|--------------|-------------|---|---------------|--------------|--------------|
| 6 | -11.189476000 | -0.671706000 | 0.070151000 | 7 | -11.090479000 | -0.620658000 | 0.015938000  |
| 1 | -11.609471000 | -0.678605000 | -           | 1 | -11.605056000 | -0.159518000 | 0.760128000  |
|   | 0.949993000   |              |             | 1 | -11.382735000 | -1.587284000 | -0.091357000 |
| 1 | -11.420608000 | -1.652522000 | 0.518958000 |   |               |              |              |
| 1 | -11.723952000 | 0.096813000  | 0.647783000 |   |               |              |              |

**Table S13.** Cartesian coordinates (in Angstrom unit) of B3LYP/cc-pVDZ optimized geometries of phenothiazine based D- $\pi$ -A systems.

| D5<br>E(RB3LYP) = -1507.38398515 a. u. |              |              |              | D5-CH <sub>3</sub><br>E(RB3LYP) = -1546.70173579 a. u. |              |              |              |
|----------------------------------------|--------------|--------------|--------------|--------------------------------------------------------|--------------|--------------|--------------|
| 6                                      | 6.141109000  | -0.541743000 | 0.085383000  | 6                                                      | 6.466391000  | -0.625560000 | 0.090000000  |
| 6                                      | 7.364454000  | 0.075858000  | 0.148669000  | 6                                                      | 7.706668000  | -0.049751000 | 0.202995000  |
| 6                                      | 7.489787000  | 1.499859000  | 0.150699000  | 6                                                      | 7.874022000  | 1.367470000  | 0.285500000  |
| 7                                      | 7.551831000  | 2.663950000  | 0.150188000  | 7                                                      | 7.970777000  | 2.527408000  | 0.350327000  |
| 6                                      | 8.581652000  | -0.772685000 | 0.216346000  | 6                                                      | 8.896818000  | -0.937203000 | 0.239092000  |
| 8                                      | 8.577629000  | -1.987236000 | 0.219827000  | 8                                                      | 8.857026000  | -2.149554000 | 0.175544000  |
| 8                                      | 9.715795000  | -0.039868000 | 0.274087000  | 8                                                      | 10.051497000 | -0.243671000 | 0.352131000  |
| 1                                      | 10.447033000 | -0.682374000 | 0.314937000  | 1                                                      | 10.762307000 | -0.909782000 | 0.366810000  |
| 6                                      | 2.395601000  | -0.009259000 | -0.116688000 | 6                                                      | 2.741250000  | 0.027081000  | -0.130394000 |
| 1                                      | 2.350179000  | 1.084335000  | -0.122523000 | 1                                                      | 2.726471000  | 1.120241000  | -0.077341000 |
| 1                                      | 6.172564000  | -1.635852000 | 0.090577000  | 1                                                      | 6.465656000  | -1.718758000 | 0.035100000  |
| 6                                      | 3.697294000  | -0.601607000 | -0.044972000 | 6                                                      | 4.024224000  | -0.605622000 | -0.074495000 |
| 6                                      | 4.870186000  | 0.101389000  | 0.015519000  | 6                                                      | 5.216177000  | 0.058047000  | 0.039461000  |
| 1                                      | 3.746413000  | -1.697440000 | -0.038935000 | 1                                                      | 4.042035000  | -1.701150000 | -0.127911000 |
| 1                                      | 4.843659000  | 1.195785000  | 0.010694000  | 1                                                      | 5.221416000  | 1.151374000  | 0.094441000  |
| 6                                      | 1.249667000  | -0.745504000 | -0.175721000 | 6                                                      | 1.575950000  | -0.671939000 | -0.244184000 |
| 1                                      | 1.354397000  | -1.836881000 | -0.165966000 | 1                                                      | 1.650623000  | -1.764791000 | -0.292461000 |
| 6                                      | -1.793876000 | 1.512487000  | -0.324659000 | 6                                                      | -1.402144000 | 1.674790000  | -0.310044000 |
| 6                                      | -2.860144000 | 0.584300000  | -0.371616000 | 6                                                      | -2.493044000 | 0.780653000  | -0.422204000 |
| 7                                      | -4.199389000 | 1.001641000  | -0.418955000 | 7                                                      | -3.817945000 | 1.236743000  | -0.464759000 |
| 6                                      | -2.507729000 | -0.787598000 | -0.388602000 | 6                                                      | -2.177422000 | -0.598155000 | -0.509573000 |
| 16                                     | -3.743149000 | -2.035230000 | -0.693284000 | 16                                                     | -3.438968000 | -1.794849000 | -0.900268000 |
| 6                                      | -5.151861000 | -1.229450000 | 0.043896000  | 6                                                      | -4.842259000 | -0.991553000 | -0.149649000 |
| 6                                      | -5.261146000 | 0.178944000  | 0.039409000  | 6                                                      | -4.910595000 | 0.417298000  | -0.074944000 |
| 6                                      | -0.466480000 | 1.105337000  | -0.278300000 | 6                                                      | -0.087379000 | 1.228965000  | -0.267959000 |
| 6                                      | -1.178786000 | -1.187320000 | -0.298201000 | 6                                                      | -0.861237000 | -1.038492000 | -0.423412000 |
| 6                                      | -6.190260000 | -2.030420000 | 0.525708000  | 6                                                      | -5.910346000 | -1.788399000 | 0.262492000  |
| 6                                      | -6.471336000 | 0.733200000  | 0.498883000  | 6                                                      | -6.115155000 | 0.968831000  | 0.393893000  |

|                                                                       |               |              |              |                                                  |              |              |              |
|-----------------------------------------------------------------------|---------------|--------------|--------------|--------------------------------------------------|--------------|--------------|--------------|
| 6                                                                     | -7.522201000  | -0.075226000 | 0.942013000  | 6                                                | -7.194234000 | 0.160828000  | 0.767123000  |
| 6                                                                     | -7.386902000  | -1.461555000 | 0.968030000  | 6                                                | -7.115270000 | -1.232456000 | 0.719420000  |
| 1                                                                     | -6.059102000  | -3.114585000 | 0.528248000  | 1                                                | -5.802027000 | -2.874502000 | 0.201103000  |
| 1                                                                     | -6.609308000  | 1.811584000  | 0.518920000  | 1                                                | -6.232028000 | 2.046745000  | 0.478742000  |
| 1                                                                     | -8.446525000  | 0.397203000  | 1.280463000  | 1                                                | -8.111650000 | 0.640966000  | 1.115983000  |
| 1                                                                     | -8.198145000  | -2.098115000 | 1.325267000  | 6                                                | 0.224914000  | -0.144117000 | -0.308747000 |
| 6                                                                     | -0.116809000  | -0.258792000 | -0.248852000 | 1                                                | -1.578215000 | 2.745840000  | -0.248131000 |
| 1                                                                     | -1.998659000  | 2.580151000  | -0.319102000 | 1                                                | 0.707291000  | 1.971821000  | -0.185473000 |
| 1                                                                     | 0.308165000   | 1.872907000  | -0.248890000 | 1                                                | -0.666522000 | -2.112526000 | -0.476666000 |
| 1                                                                     | -0.955244000  | -2.257013000 | -0.295561000 | 6                                                | -4.066326000 | 2.666843000  | -0.693083000 |
| 6                                                                     | -4.489102000  | 2.408712000  | -0.729873000 | 1                                                | -3.333346000 | 3.009025000  | -1.438653000 |
| 1                                                                     | -3.776303000  | 2.721854000  | -1.507079000 | 1                                                | -5.049980000 | 2.747801000  | -1.178264000 |
| 1                                                                     | -5.481404000  | 2.434715000  | -1.203351000 | 6                                                | -4.017033000 | 3.576614000  | 0.543285000  |
| 6                                                                     | -4.445291000  | 3.395391000  | 0.446318000  | 1                                                | -3.033283000 | 3.557135000  | 1.034339000  |
| 1                                                                     | -3.455020000  | 3.430405000  | 0.923035000  | 1                                                | -4.761939000 | 3.290040000  | 1.299480000  |
| 1                                                                     | -5.172577000  | 3.140418000  | 1.230426000  | 1                                                | -4.223569000 | 4.616116000  | 0.240020000  |
| 1                                                                     | -4.681207000  | 4.408372000  | 0.081120000  | 6                                                | -8.265508000 | -2.116593000 | 1.134197000  |
|                                                                       |               |              |              | 1                                                | -8.615201000 | -2.741991000 | 0.295331000  |
|                                                                       |               |              |              | 1                                                | -7.972580000 | -2.802460000 | 1.946792000  |
|                                                                       |               |              |              | 1                                                | -9.120760000 | -1.522299000 | 1.488059000  |
| D5-C <sub>5</sub> H <sub>11</sub><br>E(RB3LYP) = -1703.95800820 a. u. |               |              |              | D5-isopropyl<br>E(RB3LYP) = -1625.32940691 a. u. |              |              |              |
| 6                                                                     | -7.961865000  | -0.975005000 | -0.185561000 | 6                                                | 7.109217000  | -0.751578000 | 0.099269000  |
| 6                                                                     | -9.230072000  | -0.541907000 | -0.480350000 | 6                                                | 8.365768000  | -0.233209000 | 0.286393000  |
| 6                                                                     | -9.496613000  | 0.814233000  | -0.845238000 | 6                                                | 8.581010000  | 1.165871000  | 0.485340000  |
| 7                                                                     | -9.674962000  | 1.928235000  | -1.138887000 | 7                                                | 8.717089000  | 2.312674000  | 0.644558000  |
| 6                                                                     | -10.344269000 | -1.521288000 | -0.413731000 | 6                                                | 9.522381000  | -1.164605000 | 0.279306000  |
| 8                                                                     | -10.218636000 | -2.691847000 | -0.114567000 | 8                                                | 9.441331000  | -2.365865000 | 0.118593000  |
| 8                                                                     | -11.536179000 | -0.965562000 | -0.726325000 | 8                                                | 10.697571000 | -0.525771000 | 0.473923000  |
| 1                                                                     | -12.191851000 | -1.682455000 | -0.653419000 | 1                                                | 11.383704000 | -1.217083000 | 0.452046000  |
| 6                                                                     | -4.322750000  | 0.031465000  | 0.121791000  | 6                                                | 3.416591000  | 0.055759000  | -0.153122000 |
| 1                                                                     | -4.385842000  | 1.092022000  | -0.141395000 | 1                                                | 3.439694000  | 1.141061000  | -0.013041000 |
| 1                                                                     | -7.883293000  | -2.034017000 | 0.079816000  | 1                                                | 7.071174000  | -1.836268000 | -0.042493000 |
| 6                                                                     | -5.547034000  | -0.710320000 | 0.114809000  | 6                                                | 4.674280000  | -0.627239000 | -0.119090000 |
| 6                                                                     | -6.773662000  | -0.187150000 | -0.195185000 | 6                                                | 5.885784000  | -0.019821000 | 0.074621000  |
| 1                                                                     | -5.486732000  | -1.773451000 | 0.378412000  | 1                                                | 4.654365000  | -1.715021000 | -0.259389000 |
| 1                                                                     | -6.856640000  | 0.871529000  | -0.461137000 | 1                                                | 5.928442000  | 1.064799000  | 0.216759000  |
| 6                                                                     | -3.119964000  | -0.528752000 | 0.436774000  | 6                                                | 2.230172000  | -0.587484000 | -0.348481000 |
| 1                                                                     | -3.116148000  | -1.595108000 | 0.691981000  | 1                                                | 2.266696000  | -1.675077000 | -0.482813000 |

|    |              |              |              |    |              |              |              |
|----|--------------|--------------|--------------|----|--------------|--------------|--------------|
| 6  | -0.338508000 | 2.039085000  | 0.215951000  | 6  | -0.658863000 | 1.868066000  | -0.288200000 |
| 6  | 0.805183000  | 1.281317000  | 0.562741000  | 6  | -1.778057000 | 1.027859000  | -0.496108000 |
| 7  | 2.085349000  | 1.851231000  | 0.590753000  | 7  | -3.084487000 | 1.535589000  | -0.528392000 |
| 6  | 0.587746000  | -0.078194000 | 0.899492000  | 6  | -1.510428000 | -0.350345000 | -0.689474000 |
| 16 | 1.902486000  | -1.064564000 | 1.588358000  | 16 | -2.804709000 | -1.462527000 | -1.204560000 |
| 6  | 3.293822000  | -0.298432000 | 0.778603000  | 6  | -4.194897000 | -0.669082000 | -0.419505000 |
| 6  | 3.262063000  | 1.071232000  | 0.433870000  | 6  | -4.213577000 | 0.727537000  | -0.229554000 |
| 6  | -1.609637000 | 1.480259000  | 0.186008000  | 6  | 0.637608000  | 1.370763000  | -0.254338000 |
| 6  | -0.682118000 | -0.639984000 | 0.825245000  | 6  | -0.213552000 | -0.845814000 | -0.610668000 |
| 6  | 4.446135000  | -1.060057000 | 0.593216000  | 6  | -5.303049000 | -1.456280000 | -0.094887000 |
| 6  | 4.453935000  | 1.624304000  | -0.061290000 | 6  | -5.409357000 | 1.284102000  | 0.262200000  |
| 6  | 5.617456000  | 0.859103000  | -0.206354000 | 6  | -6.523644000 | 0.491954000  | 0.545816000  |
| 6  | 5.640252000  | -0.501386000 | 0.107552000  | 6  | -6.495669000 | -0.898379000 | 0.383332000  |
| 1  | 4.415592000  | -2.120127000 | 0.859729000  | 1  | -5.232987000 | -2.536953000 | -0.243855000 |
| 1  | 4.497260000  | 2.672481000  | -0.348176000 | 1  | -5.487696000 | 2.355297000  | 0.433597000  |
| 1  | 6.511288000  | 1.353936000  | -0.587332000 | 1  | -7.425683000 | 0.984410000  | 0.915454000  |
| 6  | -1.820700000 | 0.117844000  | 0.475727000  | 6  | 0.901025000  | -0.005395000 | -0.399828000 |
| 1  | -0.238859000 | 3.090127000  | -0.043550000 | 1  | -0.797745000 | 2.936560000  | -0.143173000 |
| 1  | -2.449292000 | 2.121619000  | -0.085645000 | 1  | 1.456257000  | 2.073905000  | -0.094526000 |
| 1  | -0.799509000 | -1.697247000 | 1.075716000  | 1  | -0.056413000 | -1.918643000 | -0.747191000 |
| 6  | 2.209044000  | 3.314590000  | 0.545567000  | 6  | -3.276631000 | 2.987583000  | -0.645966000 |
| 1  | 1.399980000  | 3.728748000  | 1.165292000  | 1  | -2.515375000 | 3.360285000  | -1.347313000 |
| 1  | 3.145744000  | 3.573088000  | 1.060579000  | 1  | -4.245578000 | 3.143647000  | -1.142271000 |
| 6  | 2.183114000  | 3.960706000  | -0.847457000 | 6  | -3.222702000 | 3.794330000  | 0.659793000  |
| 1  | 1.242473000  | 3.760143000  | -1.380627000 | 1  | -2.251830000 | 3.699081000  | 1.167314000  |
| 1  | 3.001290000  | 3.599903000  | -1.487175000 | 1  | -3.994600000 | 3.477388000  | 1.375739000  |
| 1  | 2.288244000  | 5.053283000  | -0.745320000 | 1  | -3.384627000 | 4.861587000  | 0.436287000  |
| 6  | 6.864970000  | -1.385459000 | -0.046411000 | 6  | -7.696015000 | -1.778007000 | 0.706086000  |
| 1  | 6.602004000  | -2.230919000 | -0.709101000 | 1  | -7.396721000 | -2.818123000 | 0.487839000  |
| 1  | 7.087115000  | -1.846500000 | 0.934030000  | 6  | -8.904911000 | -1.447922000 | -0.187465000 |
| 6  | 8.134544000  | -0.715438000 | -0.577775000 | 6  | -8.072330000 | -1.709062000 | 2.196904000  |
| 1  | 7.932201000  | -0.267143000 | -1.567588000 | 1  | -7.219114000 | -1.980737000 | 2.838246000  |
| 1  | 8.419836000  | 0.120625000  | 0.086517000  | 1  | -8.396892000 | -0.694247000 | 2.482402000  |
| 6  | 9.313445000  | -1.687292000 | -0.697667000 | 1  | -8.903000000 | -2.398584000 | 2.420842000  |
| 1  | 9.029858000  | -2.526503000 | -1.360699000 | 1  | -9.267025000 | -0.421303000 | -0.009560000 |
| 1  | 9.516693000  | -2.139940000 | 0.291342000  | 1  | -9.741441000 | -2.135577000 | 0.019854000  |
| 6  | 10.594679000 | -1.035073000 | -1.227829000 | 1  | -8.648627000 | -1.532317000 | -1.255349000 |
| 1  | 10.390075000 | -0.582803000 | -2.215908000 |    |              |              |              |
| 1  | 10.876962000 | -0.196756000 | -0.564308000 |    |              |              |              |
| 6  | 11.767103000 | -2.011546000 | -1.345227000 |    |              |              |              |
| 1  | 11.528658000 | -2.842844000 | -2.030520000 |    |              |              |              |



|                                              |              |              |              |                                           |              |                           |
|----------------------------------------------|--------------|--------------|--------------|-------------------------------------------|--------------|---------------------------|
| 1                                            | 12.019323000 | -2.453846000 | -0.366295000 |                                           |              |                           |
| 1                                            | 12.671821000 | -1.512937000 | -1.728512000 |                                           |              |                           |
| D5-t-but<br>E(RB3LYP) = -1664.64042510 a. u. |              |              |              | D5-OH<br>E(RB3LYP) = -1582.60895224 a. u. |              |                           |
| 6                                            | 7.349013000  | -0.820006000 | 0.091177000  | 6                                         | 6.459515000  | -0.615463000 0.091964000  |
| 6                                            | 8.617913000  | -0.336622000 | 0.288409000  | 6                                         | 7.698960000  | -0.036147000 0.198483000  |
| 6                                            | 8.867986000  | 1.053164000  | 0.510451000  | 6                                         | 7.863467000  | 1.382072000 0.267865000   |
| 7                                            | 9.032641000  | 2.193425000  | 0.688550000  | 7                                         | 7.957810000  | 2.542782000 0.321989000   |
| 6                                            | 9.750723000  | -1.296611000 | 0.267609000  | 6                                         | 8.890758000  | -0.920694000 0.241512000  |
| 8                                            | 9.639769000  | -2.492674000 | 0.087191000  | 8                                         | 8.853643000  | -2.133727000 0.189097000  |
| 8                                            | 10.941294000 | -0.690821000 | 0.474087000  | 8                                         | 10.044340000 | -0.223904000 0.347110000  |
| 1                                            | 11.609849000 | -1.398746000 | 0.441774000  | 1                                         | 10.756235000 | -0.888696000 0.367153000  |
| 6                                            | 3.678564000  | 0.084916000  | -0.153379000 | 6                                         | 2.732967000  | 0.026904000 -0.130685000  |
| 1                                            | 3.729138000  | 1.166825000  | 0.004561000  | 1                                         | 2.715823000  | 1.120471000 -0.087544000  |
| 1                                            | 7.283854000  | -1.900936000 | -0.068322000 | 1                                         | 6.461020000  | -1.709124000 0.047069000  |
| 6                                            | 4.918347000  | -0.630432000 | -0.128609000 | 6                                         | 4.017112000  | -0.602313000 -0.070321000 |
| 6                                            | 6.144518000  | -0.057234000 | 0.076797000  | 6                                         | 5.208024000  | 0.064881000 0.036413000   |
| 1                                            | 4.871040000  | -1.714917000 | -0.286735000 | 1                                         | 4.037301000  | -1.698256000 -0.113740000 |
| 1                                            | 6.214364000  | 1.023495000  | 0.236706000  | 1                                         | 5.210945000  | 1.158677000 0.081391000   |
| 6                                            | 2.476433000  | -0.524339000 | -0.361255000 | 6                                         | 1.568770000  | -0.675695000 -0.236859000 |
| 1                                            | 2.485225000  | -1.610163000 | -0.513410000 | 1                                         | 1.645940000  | -1.768788000 -0.275038000 |
| 6                                            | -0.348080000 | 2.003913000  | -0.266157000 | 6                                         | -1.413916000 | 1.664318000 -0.320745000  |
| 6                                            | -1.488291000 | 1.196676000  | -0.490444000 | 6                                         | -2.503981000 | 0.766688000 -0.419639000  |
| 7                                            | -2.780604000 | 1.739442000  | -0.518359000 | 7                                         | -3.828368000 | 1.216423000 -0.462066000  |
| 6                                            | -1.256233000 | -0.184955000 | -0.704691000 | 6                                         | -2.184705000 | -0.612349000 -0.496793000 |
| 16                                           | -2.577249000 | -1.255649000 | -1.238187000 | 16                                        | -3.441563000 | -1.817148000 -0.881432000 |
| 6                                            | -3.950320000 | -0.437958000 | -0.446694000 | 6                                         | -4.849052000 | -1.016401000 -0.139842000 |
| 6                                            | -3.932186000 | 0.958103000  | -0.238343000 | 6                                         | -4.918951000 | 0.392517000 -0.063010000  |
| 6                                            | 0.934899000  | 1.472689000  | -0.237585000 | 6                                         | -0.098547000 | 1.221265000 -0.277773000  |
| 6                                            | 0.027423000  | -0.714872000 | -0.631874000 | 6                                         | -0.867837000 | -1.049430000 -0.409444000 |
| 6                                            | -5.077283000 | -1.199289000 | -0.140528000 | 6                                         | -5.910250000 | -1.822373000 0.269810000  |
| 6                                            | -5.116060000 | 1.533024000  | 0.250171000  | 6                                         | -6.120554000 | 0.941813000 0.413528000   |
| 6                                            | -6.254715000 | 0.763701000  | 0.516312000  | 6                                         | -7.203315000 | 0.140097000 0.788987000   |
| 6                                            | -6.267442000 | -0.623094000 | 0.338968000  | 6                                         | -7.103563000 | -1.250323000 0.726816000  |
| 1                                            | -5.018082000 | -2.276410000 | -0.308689000 | 1                                         | -5.829508000 | -2.909056000 0.216073000  |
| 1                                            | -5.173540000 | 2.603009000  | 0.436770000  | 1                                         | -6.237617000 | 2.019273000 0.502170000   |
| 1                                            | -7.138349000 | 1.284184000  | 0.883715000  | 1                                         | -8.122397000 | 0.614351000 1.143927000   |
| 6                                            | 1.162892000  | 0.092708000  | -0.405413000 | 6                                         | 0.216903000  | -0.151736000 -0.304815000 |
| 1                                            | -0.459484000 | 3.073111000  | -0.103675000 | 1                                         | -1.592231000 | 2.735628000 -0.269286000  |

|                                                         |              |              |              |                                                                       |               |              |              |
|---------------------------------------------------------|--------------|--------------|--------------|-----------------------------------------------------------------------|---------------|--------------|--------------|
| 1                                                       | 1.771046000  | 2.151621000  | -0.064260000 | 1                                                                     | 0.694989000   | 1.966384000  | -0.204959000 |
| 1                                                       | 0.157021000  | -1.789128000 | -0.785118000 | 1                                                                     | -0.670746000  | -2.123440000 | -0.454345000 |
| 6                                                       | -2.933586000 | 3.198196000  | -0.605855000 | 6                                                                     | -4.085766000  | 2.641604000  | -0.704754000 |
| 1                                                       | -2.159152000 | 3.565697000  | -1.295293000 | 1                                                                     | -3.357710000  | 2.981011000  | -1.456604000 |
| 1                                                       | -3.895516000 | 3.390304000  | -1.103061000 | 1                                                                     | -5.071973000  | 2.711742000  | -1.186995000 |
| 6                                                       | -2.865509000 | 3.973500000  | 0.718024000  | 6                                                                     | -4.036494000  | 3.566025000  | 0.521089000  |
| 1                                                       | -1.900176000 | 3.840665000  | 1.227714000  | 1                                                                     | -3.050513000  | 3.556989000  | 1.007945000  |
| 1                                                       | -3.649594000 | 3.660542000  | 1.422360000  | 1                                                                     | -4.776158000  | 3.284799000  | 1.284556000  |
| 1                                                       | -2.997926000 | 5.049520000  | 0.518424000  | 1                                                                     | -4.249576000  | 4.601016000  | 0.207047000  |
| 6                                                       | -7.490279000 | -1.508611000 | 0.637405000  | 8                                                                     | -8.109730000  | -2.098600000 | 1.088600000  |
| 6                                                       | -7.118593000 | -2.552656000 | 1.715822000  | 1                                                                     | -8.868209000  | -1.574771000 | 1.385453000  |
| 1                                                       | -6.291727000 | -3.202744000 | 1.390360000  |                                                                       |               |              |              |
| 1                                                       | -6.809874000 | -2.060553000 | 2.652101000  |                                                                       |               |              |              |
| 1                                                       | -7.983516000 | -3.199556000 | 1.938201000  |                                                                       |               |              |              |
| 6                                                       | -8.685465000 | -0.686776000 | 1.152941000  |                                                                       |               |              |              |
| 1                                                       | -8.448604000 | -0.161275000 | 2.091629000  |                                                                       |               |              |              |
| 1                                                       | -9.019375000 | 0.060235000  | 0.415453000  |                                                                       |               |              |              |
| 1                                                       | -9.536889000 | -1.355800000 | 1.354447000  |                                                                       |               |              |              |
| 6                                                       | -7.926037000 | -2.238816000 | -0.654229000 |                                                                       |               |              |              |
| 1                                                       | -8.800313000 | -2.880956000 | -0.455965000 |                                                                       |               |              |              |
| 1                                                       | -8.202411000 | -1.518688000 | -1.441136000 |                                                                       |               |              |              |
| 1                                                       | -7.125585000 | -2.880962000 | -1.053294000 |                                                                       |               |              |              |
| D5-OCH <sub>3</sub><br>E(RB3LYP) = -1621.91065765 a. u. |              |              |              | D5-OC <sub>2</sub> H <sub>5</sub><br>E(RB3LYP) = -1661.23080517 a. u. |               |              |              |
| 6                                                       | 6.806039000  | -0.676901000 | 0.115016000  | 6                                                                     | -7.150429000  | -0.791264000 | -0.120031000 |
| 6                                                       | 8.053841000  | -0.124925000 | 0.262343000  | 6                                                                     | -8.411032000  | -0.286293000 | -0.318634000 |
| 6                                                       | 8.242482000  | 1.286362000  | 0.388314000  | 6                                                                     | -8.637977000  | 1.108741000  | -0.532029000 |
| 7                                                       | 8.356676000  | 2.442254000  | 0.488175000  | 7                                                                     | -8.783705000  | 2.252716000  | -0.702910000 |
| 6                                                       | 9.228747000  | -1.032241000 | 0.289659000  | 6                                                                     | -9.558775000  | -1.227967000 | -0.308676000 |
| 8                                                       | 9.170927000  | -2.241571000 | 0.190459000  | 8                                                                     | -9.468043000  | -2.427018000 | -0.136167000 |
| 8                                                       | 10.392857000 | -0.361411000 | 0.439331000  | 8                                                                     | -10.739070000 | -0.602028000 | -0.515507000 |
| 1                                                       | 11.092222000 | -1.039645000 | 0.444791000  | 1                                                                     | -11.418442000 | -1.299853000 | -0.490509000 |
| 6                                                       | 3.095293000  | 0.040484000  | -0.139102000 | 6                                                                     | -3.466561000  | 0.049992000  | 0.143840000  |
| 1                                                       | 3.096245000  | 1.131804000  | -0.054954000 | 1                                                                     | -3.497787000  | 1.133714000  | -0.006552000 |
| 1                                                       | 6.788892000  | -1.767936000 | 0.028484000  | 1                                                                     | -7.103406000  | -1.874195000 | 0.032220000  |
| 6                                                       | 4.367186000  | -0.613349000 | -0.083411000 | 6                                                                     | -4.717901000  | -0.643586000 | 0.109810000  |
| 6                                                       | 5.567857000  | 0.027710000  | 0.066487000  | 6                                                                     | -5.934016000  | -0.048663000 | -0.095956000 |
| 1                                                       | 4.369016000  | -1.707083000 | -0.168086000 | 1                                                                     | -4.689556000  | -1.729827000 | 0.260482000  |
| 1                                                       | 5.589260000  | 1.118805000  | 0.153052000  | 1                                                                     | -5.985347000  | 1.034159000  | -0.248578000 |

|    |              |              |              |    |              |              |              |
|----|--------------|--------------|--------------|----|--------------|--------------|--------------|
| 6  | 1.920949000  | -0.636956000 | -0.289139000 | 6  | -2.275475000 | -0.581670000 | 0.351236000  |
| 1  | 1.980151000  | -1.729037000 | -0.367646000 | 1  | -2.304141000 | -1.668263000 | 0.495506000  |
| 6  | -1.020068000 | 1.756065000  | -0.327789000 | 6  | 0.593440000  | 1.896349000  | 0.280835000  |
| 6  | -2.123572000 | 0.882169000  | -0.478574000 | 6  | 1.719744000  | 1.066944000  | 0.499636000  |
| 7  | -3.438857000 | 1.357276000  | -0.524309000 | 7  | 3.019660000  | 1.583051000  | 0.531887000  |
| 6  | -1.826404000 | -0.498484000 | -0.603679000 | 6  | 1.461092000  | -0.311680000 | 0.706959000  |
| 16 | -3.096351000 | -1.666256000 | -1.052613000 | 16 | 2.757699000  | -1.410516000 | 1.244916000  |
| 6  | -4.502938000 | -0.868410000 | -0.305550000 | 6  | 4.151368000  | -0.619077000 | 0.467138000  |
| 6  | -4.550972000 | 0.539217000  | -0.177565000 | 6  | 4.160082000  | 0.778318000  | 0.251330000  |
| 6  | 0.286759000  | 1.288992000  | -0.281578000 | 6  | -0.698322000 | 1.388283000  | 0.246705000  |
| 6  | -0.518433000 | -0.961127000 | -0.513314000 | 6  | 0.168654000  | -0.818027000 | 0.628428000  |
| 6  | -5.584958000 | -1.665344000 | 0.054294000  | 6  | 5.261324000  | -1.404022000 | 0.171745000  |
| 6  | -5.751423000 | 1.088517000  | 0.295511000  | 6  | 5.350772000  | 1.332237000  | -0.240659000 |
| 6  | -6.860631000 | 0.297012000  | 0.623454000  | 6  | 6.487070000  | 0.555498000  | -0.504331000 |
| 6  | -6.781972000 | -1.092660000 | 0.511823000  | 6  | 6.448398000  | -0.826795000 | -0.306307000 |
| 1  | -5.525712000 | -2.750916000 | -0.037760000 | 1  | 5.231917000  | -2.482946000 | 0.331495000  |
| 1  | -5.851731000 | 2.164007000  | 0.422086000  | 1  | 5.421681000  | 2.400208000  | -0.433628000 |
| 1  | -7.766326000 | 0.789101000  | 0.974834000  | 1  | 7.382491000  | 1.052103000  | -0.874824000 |
| 6  | 0.579491000  | -0.087275000 | -0.357383000 | 6  | -0.951884000 | 0.011103000  | 0.403848000  |
| 1  | -1.181121000 | 2.827516000  | -0.237133000 | 1  | 0.724458000  | 2.964509000  | 0.125924000  |
| 1  | 1.091363000  | 2.016816000  | -0.167096000 | 1  | -1.521982000 | 2.083173000  | 0.076603000  |
| 1  | -0.338725000 | -2.035919000 | -0.596561000 | 1  | 0.019145000  | -1.890519000 | 0.776100000  |
| 6  | -3.666601000 | 2.795552000  | -0.714278000 | 6  | 3.202882000  | 3.036573000  | 0.632995000  |
| 1  | -2.919481000 | 3.151140000  | -1.439424000 | 1  | 2.435850000  | 3.414835000  | 1.325139000  |
| 1  | -4.642780000 | 2.902687000  | -1.209785000 | 1  | 4.168620000  | 3.203808000  | 1.132269000  |
| 6  | -3.623039000 | 3.668853000  | 0.548575000  | 6  | 3.151461000  | 3.826666000  | -0.683224000 |
| 1  | -2.645900000 | 3.623100000  | 1.051034000  | 1  | 2.183134000  | 3.719953000  | -1.193415000 |
| 1  | -4.380663000 | 3.369730000  | 1.287196000  | 1  | 3.927694000  | 3.504216000  | -1.392079000 |
| 1  | -3.813332000 | 4.719209000  | 0.273230000  | 1  | 3.307234000  | 4.897555000  | -0.472967000 |
| 8  | -7.781902000 | -1.969675000 | 0.811581000  | 8  | 7.476773000  | -1.689821000 | -0.537533000 |
| 6  | -9.012263000 | -1.441575000 | 1.280845000  | 6  | 8.711631000  | -1.165905000 | -1.028246000 |
| 1  | -8.883152000 | -0.883967000 | 2.225957000  | 1  | 9.113402000  | -0.422825000 | -0.313916000 |
| 1  | -9.483833000 | -0.778693000 | 0.533095000  | 1  | 8.542926000  | -0.650565000 | -1.992493000 |
| 1  | -9.664783000 | -2.306214000 | 1.458708000  | 6  | 9.667264000  | -2.332080000 | -1.194946000 |
|    |              |              |              | 1  | 9.262287000  | -3.067056000 | -1.907513000 |
|    |              |              |              | 1  | 9.832829000  | -2.839399000 | -0.232042000 |
|    |              |              |              | 1  | 10.637980000 | -1.976007000 | -1.573860000 |

| D5-NH <sub>2</sub><br>E(RB3LYP) = -1562.74278223 a. u. |              |              |              | D5-N(CH <sub>3</sub> ) <sub>2</sub><br>E(RB3LYP) = -1641.35353649 a. u. |               |              |              |
|--------------------------------------------------------|--------------|--------------|--------------|-------------------------------------------------------------------------|---------------|--------------|--------------|
| 6                                                      | 6.459886000  | -0.618717000 | 0.091685000  | 6                                                                       | -7.079002000  | -0.760229000 | -0.107987000 |
| 6                                                      | 7.702068000  | -0.044935000 | 0.202345000  | 6                                                                       | -8.344301000  | -0.252474000 | -0.270550000 |
| 6                                                      | 7.872416000  | 1.372200000  | 0.277450000  | 6                                                                       | -8.578473000  | 1.148932000  | -0.425556000 |
| 7                                                      | 7.971712000  | 2.532317000  | 0.336327000  | 7                                                                       | -8.730100000  | 2.298287000  | -0.549092000 |
| 6                                                      | 8.889576000  | -0.934388000 | 0.243853000  | 6                                                                       | -9.488160000  | -1.197747000 | -0.283399000 |
| 8                                                      | 8.848066000  | -2.147281000 | 0.187103000  | 8                                                                       | -9.392114000  | -2.402647000 | -0.159713000 |
| 8                                                      | 10.046442000 | -0.243140000 | 0.353707000  | 8                                                                       | -10.673686000 | -0.568936000 | -0.450272000 |
| 1                                                      | 10.754819000 | -0.911662000 | 0.372235000  | 1                                                                       | -11.349493000 | -1.270568000 | -0.444140000 |
| 6                                                      | 2.735906000  | 0.034498000  | -0.133775000 | 6                                                                       | -3.394109000  | 0.077429000  | 0.143712000  |
| 1                                                      | 2.720498000  | 1.127950000  | -0.087303000 | 1                                                                       | -3.427640000  | 1.166304000  | 0.037563000  |
| 1                                                      | 6.457347000  | -1.712220000 | 0.042706000  | 1                                                                       | -7.027045000  | -1.848207000 | 0.000577000  |
| 6                                                      | 4.018005000  | -0.597331000 | -0.073924000 | 6                                                                       | -4.644338000  | -0.615636000 | 0.097132000  |
| 6                                                      | 5.211381000  | 0.065898000  | 0.036752000  | 6                                                                       | -5.864839000  | -0.015974000 | -0.069631000 |
| 1                                                      | 4.035609000  | -1.693224000 | -0.121053000 | 1                                                                       | -4.612744000  | -1.707050000 | 0.203824000  |
| 1                                                      | 5.217663000  | 1.159515000  | 0.085524000  | 1                                                                       | -5.920298000  | 1.071937000  | -0.178253000 |
| 6                                                      | 1.570014000  | -0.666029000 | -0.243219000 | 6                                                                       | -2.199504000  | -0.561119000 | 0.311109000  |
| 1                                                      | 1.646225000  | -1.759159000 | -0.284258000 | 1                                                                       | -2.226815000  | -1.652772000 | 0.411273000  |
| 6                                                      | -1.409409000 | 1.676882000  | -0.325092000 | 6                                                                       | 0.667808000   | 1.918291000  | 0.310201000  |
| 6                                                      | -2.501493000 | 0.780243000  | -0.422398000 | 6                                                                       | 1.797623000   | 1.080313000  | 0.478080000  |
| 7                                                      | -3.823311000 | 1.229906000  | -0.459759000 | 7                                                                       | 3.096090000   | 1.592044000  | 0.512022000  |
| 6                                                      | -2.182952000 | -0.599938000 | -0.502941000 | 6                                                                       | 1.540670000   | -0.306915000 | 0.631822000  |
| 16                                                     | -3.440513000 | -1.801217000 | -0.897809000 | 16                                                                      | 2.843105000   | -1.424539000 | 1.115693000  |
| 6                                                      | -4.849490000 | -1.003530000 | -0.153522000 | 6                                                                       | 4.229774000   | -0.605206000 | 0.349988000  |
| 6                                                      | -4.915587000 | 0.401945000  | -0.067215000 | 6                                                                       | 4.232664000   | 0.793961000  | 0.190694000  |
| 6                                                      | -0.094893000 | 1.232461000  | -0.283288000 | 6                                                                       | -0.623895000  | 1.411703000  | 0.271024000  |
| 6                                                      | -0.866659000 | -1.037710000 | -0.416728000 | 6                                                                       | 0.247497000   | -0.809083000 | 0.547890000  |
| 6                                                      | -5.911214000 | -1.811580000 | 0.253608000  | 6                                                                       | 5.332951000   | -1.389167000 | 0.014619000  |
| 6                                                      | -6.117039000 | 0.945024000  | 0.420432000  | 6                                                                       | 5.425433000   | 1.358749000  | -0.289998000 |
| 6                                                      | -7.196210000 | 0.142585000  | 0.793190000  | 6                                                                       | 6.548899000   | 0.589703000  | -0.594185000 |
| 6                                                      | -7.114039000 | -1.255930000 | 0.723686000  | 6                                                                       | 6.530172000   | -0.815693000 | -0.472168000 |
| 1                                                      | -5.805976000 | -2.896767000 | 0.178449000  | 1                                                                       | 5.248887000   | -2.465262000 | 0.156119000  |
| 1                                                      | -6.232815000 | 2.021954000  | 0.521007000  | 1                                                                       | 5.505513000   | 2.434090000  | -0.434755000 |
| 1                                                      | -8.112053000 | 0.617473000  | 1.153256000  | 1                                                                       | 7.439513000   | 1.106925000  | -0.945887000 |
| 6                                                      | 0.219544000  | -0.141178000 | -0.310900000 | 6                                                                       | -0.876202000  | 0.028556000  | 0.372209000  |
| 1                                                      | -1.586925000 | 2.748368000  | -0.273021000 | 1                                                                       | 0.797358000   | 2.992153000  | 0.198834000  |
| 1                                                      | 0.699610000  | 1.976656000  | -0.210887000 | 1                                                                       | -1.449714000  | 2.112795000  | 0.141343000  |
| 1                                                      | -0.670171000 | -2.111754000 | -0.464640000 | 1                                                                       | 0.099055000   | -1.886745000 | 0.653301000  |
|                                                        |              |              |              | 6                                                                       | 3.285625000   | 3.039944000  | 0.662426000  |

|                                                          |               |              |              |                                                          |               |              |              |
|----------------------------------------------------------|---------------|--------------|--------------|----------------------------------------------------------|---------------|--------------|--------------|
| 6                                                        | -4.082267000  | 2.655885000  | -0.693975000 | 1                                                        | 2.528114000   | 3.397442000  | 1.375807000  |
| 1                                                        | -3.357286000  | 3.000922000  | -1.446382000 | 1                                                        | 4.257557000   | 3.186909000  | 1.155884000  |
| 1                                                        | -5.070492000  | 2.727966000  | -1.171512000 | 6                                                        | 3.222410000   | 3.873252000  | -0.626180000 |
| 6                                                        | -4.029063000  | 3.571959000  | 0.537869000  | 1                                                        | 2.247566000   | 3.786411000  | -1.127844000 |
| 1                                                        | -3.041057000  | 3.560173000  | 1.020753000  | 1                                                        | 3.989346000   | 3.570020000  | -1.353449000 |
| 1                                                        | -4.765935000  | 3.284009000  | 1.301563000  | 1                                                        | 3.385143000   | 4.936274000  | -0.383530000 |
| 1                                                        | -4.244273000  | 4.609047000  | 0.232176000  | 7                                                        | 7.623147000   | -1.600745000 | -0.818771000 |
| 7                                                        | -8.203922000  | -2.069627000 | 1.042754000  | 6                                                        | 7.630195000   | -3.006905000 | -0.458933000 |
| 1                                                        | -8.859464000  | -1.653460000 | 1.697993000  | 1                                                        | 7.580995000   | -3.176964000 | 0.635973000  |
| 1                                                        | -7.955428000  | -3.011004000 | 1.333252000  | 1                                                        | 6.782423000   | -3.540049000 | -0.920215000 |
|                                                          |               |              |              | 1                                                        | 8.551667000   | -3.469179000 | -0.836268000 |
|                                                          |               |              |              | 6                                                        | 8.896339000   | -0.957295000 | -1.085339000 |
|                                                          |               |              |              | 1                                                        | 9.292044000   | -0.397081000 | -0.213658000 |
|                                                          |               |              |              | 1                                                        | 9.633238000   | -1.721374000 | -1.365278000 |
|                                                          |               |              |              | 1                                                        | 8.816659000   | -0.252161000 | -1.929424000 |
| D5-PhCH <sub>3</sub><br>E(RB3LYP) = -1777.77268048 a. u. |               |              |              | D5-PhNH <sub>2</sub><br>E(RB3LYP) = -1793.81532069 a. u. |               |              |              |
| 6                                                        | -8.044786000  | -1.131819000 | -0.057993000 | 6                                                        | -8.042173000  | -1.124496000 | -0.060535000 |
| 6                                                        | -9.338162000  | -0.769857000 | -0.337955000 | 6                                                        | -9.336468000  | -0.762283000 | -0.337581000 |
| 6                                                        | -9.677961000  | 0.559490000  | -0.738932000 | 6                                                        | -9.677609000  | 0.568372000  | -0.732816000 |
| 7                                                        | -9.916443000  | 1.653582000  | -1.063081000 | 7                                                        | -9.917286000  | 1.663594000  | -1.052371000 |
| 6                                                        | -10.401906000 | -1.799167000 | -0.216170000 | 6                                                        | -10.399075000 | -1.792519000 | -0.218730000 |
| 8                                                        | -10.212909000 | -2.951936000 | 0.116511000  | 8                                                        | -10.209429000 | -2.946728000 | 0.109047000  |
| 8                                                        | -11.625434000 | -1.311564000 | -0.519479000 | 8                                                        | -11.623677000 | -1.304684000 | -0.518403000 |
| 1                                                        | -12.244128000 | -2.056147000 | -0.409905000 | 1                                                        | -12.241168000 | -2.050516000 | -0.410798000 |
| 6                                                        | -4.453994000  | 0.060023000  | 0.136834000  | 6                                                        | -4.451237000  | 0.065512000  | 0.135966000  |
| 1                                                        | -4.575308000  | 1.107116000  | -0.157987000 | 1                                                        | -4.571849000  | 1.114040000  | -0.153988000 |
| 1                                                        | -7.909082000  | -2.176677000 | 0.238545000  | 1                                                        | -7.905717000  | -2.170518000 | 0.231575000  |
| 6                                                        | -5.640104000  | -0.740790000 | 0.180235000  | 6                                                        | -5.637401000  | -0.734524000 | 0.176858000  |
| 6                                                        | -6.896858000  | -0.288016000 | -0.118667000 | 6                                                        | -6.894826000  | -0.280445000 | -0.118876000 |
| 1                                                        | -5.521867000  | -1.790590000 | 0.475615000  | 1                                                        | -5.519327000  | -1.785680000 | 0.467576000  |
| 1                                                        | -7.037270000  | 0.756235000  | -0.415734000 | 1                                                        | -7.035522000  | 0.765064000  | -0.411339000 |
| 6                                                        | -3.218861000  | -0.429823000 | 0.442634000  | 6                                                        | -3.215874000  | -0.426864000 | 0.438555000  |
| 1                                                        | -3.156297000  | -1.485788000 | 0.731082000  | 1                                                        | -3.154465000  | -1.484287000 | 0.722019000  |
| 6                                                        | -0.574708000  | 2.264546000  | 0.081479000  | 6                                                        | -0.569043000  | 2.265467000  | 0.088251000  |
| 6                                                        | 0.611337000   | 1.576060000  | 0.428129000  | 6                                                        | 0.617145000   | 1.573497000  | 0.429398000  |
| 7                                                        | 1.862699000   | 2.210482000  | 0.411359000  | 7                                                        | 1.868328000   | 2.205109000  | 0.413401000  |
| 6                                                        | 0.470153000   | 0.219162000  | 0.810553000  | 6                                                        | 0.474215000   | 0.214625000  | 0.806433000  |
| 16                                                       | 1.847836000   | -0.677963000 | 1.498613000  | 16                                                       | 1.849946000   | -0.686698000 | 1.492660000  |

|   |              |              |              |   |              |              |              |
|---|--------------|--------------|--------------|---|--------------|--------------|--------------|
| 6 | 3.178499000  | 0.130247000  | 0.628871000  | 6 | 3.183539000  | 0.122577000  | 0.627613000  |
| 6 | 3.071700000  | 1.487211000  | 0.253390000  | 6 | 3.077735000  | 1.479636000  | 0.254372000  |
| 6 | -1.816616000 | 1.642476000  | 0.095807000  | 6 | -1.811610000 | 1.645167000  | 0.101044000  |
| 6 | -0.771037000 | -0.407393000 | 0.780927000  | 6 | -0.767886000 | -0.409630000 | 0.774868000  |
| 6 | 4.362556000  | -0.581608000 | 0.440483000  | 6 | 4.367524000  | -0.590000000 | 0.441475000  |
| 6 | 4.227958000  | 2.089426000  | -0.276841000 | 6 | 4.234555000  | 2.080148000  | -0.275708000 |
| 6 | 5.421044000  | 1.381202000  | -0.425983000 | 6 | 5.426287000  | 1.370115000  | -0.427473000 |
| 6 | 5.518848000  | 0.025343000  | -0.081726000 | 6 | 5.525710000  | 0.013672000  | -0.082476000 |
| 1 | 4.393451000  | -1.626178000 | 0.756259000  | 1 | 4.396995000  | -1.633753000 | 0.760089000  |
| 1 | 4.210161000  | 3.128451000  | -0.597296000 | 1 | 4.218237000  | 3.119452000  | -0.595764000 |
| 1 | 6.280557000  | 1.894839000  | -0.860092000 | 1 | 6.284535000  | 1.883630000  | -0.864322000 |
| 6 | -1.952857000 | 0.281554000  | 0.432755000  | 6 | -1.949425000 | 0.282519000  | 0.431110000  |
| 1 | -0.533099000 | 3.310272000  | -0.212965000 | 1 | -0.526317000 | 3.312631000  | -0.200944000 |
| 1 | -2.692608000 | 2.232154000  | -0.178063000 | 1 | -2.687202000 | 2.237398000  | -0.168685000 |
| 1 | -0.829945000 | -1.460706000 | 1.066073000  | 1 | -0.828153000 | -1.464089000 | 1.055573000  |
| 6 | 1.910303000  | 3.677125000  | 0.327084000  | 6 | 1.919218000  | 3.671482000  | 0.332648000  |
| 1 | 1.092173000  | 4.064892000  | 0.951825000  | 1 | 1.102982000  | 4.060398000  | 0.959259000  |
| 1 | 2.841242000  | 3.996548000  | 0.817736000  | 1 | 2.851827000  | 3.987438000  | 0.822337000  |
| 6 | 1.826070000  | 4.284356000  | -1.080851000 | 6 | 1.834547000  | 4.281827000  | -1.073970000 |
| 1 | 0.887366000  | 4.023033000  | -1.590573000 | 1 | 0.894251000  | 4.024038000  | -1.582629000 |
| 1 | 2.649686000  | 3.948976000  | -1.727421000 | 1 | 2.656269000  | 3.944990000  | -1.722186000 |
| 1 | 1.877377000  | 5.383080000  | -1.008026000 | 1 | 1.889115000  | 5.380313000  | -0.999303000 |
| 6 | 7.949387000  | -2.806677000 | -0.813405000 | 6 | 7.951347000  | -2.832988000 | -0.790302000 |
| 6 | 9.200861000  | -2.206383000 | -0.597661000 | 6 | 9.205366000  | -2.221380000 | -0.599780000 |
| 6 | 9.215891000  | -0.859922000 | -0.208741000 | 6 | 9.226393000  | -0.861306000 | -0.235352000 |
| 6 | 6.764723000  | -2.091786000 | -0.648313000 | 6 | 6.773032000  | -2.111342000 | -0.621470000 |
| 6 | 8.031667000  | -0.139268000 | -0.040371000 | 6 | 8.041823000  | -0.149155000 | -0.069762000 |
| 6 | 6.778980000  | -0.738848000 | -0.257193000 | 6 | 6.783117000  | -0.751283000 | -0.257503000 |
| 1 | 7.901944000  | -3.853637000 | -1.126247000 | 1 | 7.904494000  | -3.885840000 | -1.082049000 |
| 1 | 8.082652000  | 0.900064000  | 0.291476000  | 1 | 8.097739000  | 0.897295000  | 0.238230000  |
| 1 | 10.173193000 | -0.365278000 | -0.023330000 | 1 | 10.185634000 | -0.364211000 | -0.066381000 |
| 1 | 5.811334000  | -2.584413000 | -0.851829000 | 1 | 5.820437000  | -2.612766000 | -0.806448000 |
| 6 | 10.477047000 | -2.991083000 | -0.782010000 | 7 | 10.386221000 | -2.955375000 | -0.704201000 |
| 1 | 10.501657000 | -3.877041000 | -0.125330000 | 1 | 11.212877000 | -2.407311000 | -0.922413000 |
| 1 | 10.575993000 | -3.356842000 | -1.818166000 | 1 | 10.325662000 | -3.780964000 | -1.292463000 |
| 1 | 11.363359000 | -2.380075000 | -0.555874000 |   |              |              |              |

**Table S14.** Cartesian coordinates (in Angstrom unit) of B3LYP/cc-pVDZ optimized geometries of coumarin based D- $\pi$ -A systems.

| D6<br>E(RB3LYP) = -1010.12941408 a. u. |              |              |              | D6-CH <sub>3</sub><br>E(RB3LYP) = -1049.44836104 a. u. |              |              |              |
|----------------------------------------|--------------|--------------|--------------|--------------------------------------------------------|--------------|--------------|--------------|
| 6                                      | 3.036412000  | -1.857466000 | 0.000004000  | 6                                                      | 2.560347000  | 1.992917000  | 0.000032000  |
| 6                                      | 2.085262000  | -0.721198000 | 0.000011000  | 6                                                      | 1.639009000  | 0.833865000  | 0.000150000  |
| 6                                      | 2.573182000  | 0.559450000  | 0.000022000  | 6                                                      | 2.160379000  | -0.434990000 | 0.000289000  |
| 6                                      | 3.979431000  | 0.832390000  | 0.000015000  | 6                                                      | 3.570853000  | -0.670491000 | 0.000199000  |
| 6                                      | 4.861847000  | -0.268623000 | 0.000008000  | 6                                                      | 4.425923000  | 0.450059000  | -0.000033000 |
| 6                                      | 6.247219000  | -0.089700000 | -0.000008000 | 6                                                      | 5.815590000  | 0.307995000  | -0.000158000 |
| 6                                      | 6.761830000  | 1.205162000  | -0.000016000 | 6                                                      | 6.390228000  | -0.965452000 | -0.000053000 |
| 6                                      | 5.904393000  | 2.320063000  | -0.000007000 | 6                                                      | 5.541120000  | -2.097125000 | 0.000193000  |
| 6                                      | 4.528751000  | 2.134328000  | 0.000007000  | 6                                                      | 4.163807000  | -1.954189000 | 0.000311000  |
| 1                                      | 1.886365000  | 1.409792000  | 0.000031000  | 1                                                      | 1.494909000  | -1.302201000 | 0.000460000  |
| 1                                      | 3.851645000  | 2.991726000  | 0.000013000  | 1                                                      | 3.516225000  | -2.834219000 | 0.000498000  |
| 1                                      | 6.320881000  | 3.328700000  | -0.000013000 | 1                                                      | 5.982022000  | -3.096582000 | 0.000290000  |
| 1                                      | 6.893036000  | -0.968457000 | -0.000014000 | 1                                                      | 6.430573000  | 1.209401000  | -0.000325000 |
| 8                                      | 4.391400000  | -1.548787000 | 0.000021000  | 8                                                      | 3.924643000  | 1.717695000  | -0.000121000 |
| 8                                      | 2.731997000  | -3.024822000 | -0.000034000 | 8                                                      | 2.229144000  | 3.153066000  | -0.000275000 |
| 6                                      | -4.176767000 | -0.416117000 | -0.000005000 | 6                                                      | -4.612834000 | 0.370127000  | 0.000044000  |
| 6                                      | -5.325903000 | 0.328841000  | -0.000006000 | 6                                                      | -5.744563000 | -0.401771000 | -0.000048000 |
| 6                                      | -5.297558000 | 1.758515000  | -0.000008000 | 6                                                      | -5.682343000 | -1.830306000 | -0.000211000 |
| 7                                      | -5.234193000 | 2.922273000  | -0.000013000 | 7                                                      | -5.592422000 | -2.992365000 | -0.000344000 |
| 6                                      | -6.632263000 | -0.384743000 | -0.000006000 | 6                                                      | -7.066841000 | 0.280557000  | 0.000025000  |
| 8                                      | -6.755212000 | -1.591877000 | 0.000010000  | 8                                                      | -7.219081000 | 1.484534000  | 0.000169000  |
| 8                                      | -7.679177000 | 0.467357000  | 0.000009000  | 8                                                      | -8.093907000 | -0.595896000 | -0.000072000 |
| 1                                      | -8.479846000 | -0.088099000 | 0.000022000  | 1                                                      | -8.906872000 | -0.058665000 | -0.000008000 |
| 6                                      | -0.390367000 | -0.252043000 | -0.000001000 | 6                                                      | -0.823870000 | 0.300059000  | 0.000051000  |
| 1                                      | -0.247767000 | 0.834014000  | -0.000004000 | 1                                                      | -0.653448000 | -0.781939000 | -0.000091000 |
| 1                                      | -4.322366000 | -1.500783000 | -0.000004000 | 1                                                      | -4.784355000 | 1.451018000  | 0.000167000  |
| 6                                      | -1.745978000 | -0.721911000 | -0.000003000 | 6                                                      | -2.190489000 | 0.735210000  | 0.000097000  |
| 6                                      | -2.841906000 | 0.094364000  | -0.000005000 | 6                                                      | -3.266532000 | -0.107737000 | -0.000007000 |
| 1                                      | -1.896950000 | -1.807757000 | -0.000003000 | 1                                                      | -2.368715000 | 1.816996000  | 0.000225000  |
| 1                                      | -2.705673000 | 1.180653000  | -0.000007000 | 1                                                      | -3.103774000 | -1.190369000 | -0.000134000 |
| 6                                      | 0.679387000  | -1.093063000 | 0.000006000  | 6                                                      | 0.224435000  | 1.168347000  | 0.000163000  |
| 1                                      | 0.502281000  | -2.171772000 | 0.000010000  | 1                                                      | 0.018949000  | 2.242074000  | 0.000255000  |
| 1                                      | 7.843848000  | 1.351610000  | -0.000030000 | 6                                                      | 7.887307000  | -1.141848000 | -0.000280000 |
|                                        |              |              |              | 1                                                      | 8.217285000  | -1.710573000 | 0.885196000  |
|                                        |              |              |              | 1                                                      | 8.217151000  | -1.709136000 | -0.886740000 |

|                                                                       |               |              |              |                                                  |              |              |              |
|-----------------------------------------------------------------------|---------------|--------------|--------------|--------------------------------------------------|--------------|--------------|--------------|
|                                                                       |               |              |              | 1                                                | 8.411446000  | -0.175791000 | 0.000436000  |
| D6-C <sub>5</sub> H <sub>11</sub><br>E(RB3LYP) = -1206.70441262 a. u. |               |              |              | D6-isopropyl<br>E(RB3LYP) = -1128.07595004 a. u. |              |              |              |
| 6                                                                     | 0.447249000   | 2.620052000  | 0.000096000  | 6                                                | -1.749673000 | 2.057336000  | -0.000075000 |
| 6                                                                     | -0.302076000  | 1.342102000  | -0.000084000 | 6                                                | -0.842431000 | 0.886316000  | -0.000257000 |
| 6                                                                     | 0.392500000   | 0.159464000  | -0.000222000 | 6                                                | -1.379433000 | -0.375592000 | -0.000442000 |
| 6                                                                     | 1.822283000   | 0.125514000  | -0.000150000 | 6                                                | -2.793226000 | -0.593196000 | -0.000329000 |
| 6                                                                     | 2.512598000   | 1.357219000  | 0.000056000  | 6                                                | -3.635673000 | 0.538969000  | -0.000014000 |
| 6                                                                     | 3.903829000   | 1.409936000  | 0.000145000  | 6                                                | -5.024181000 | 0.416357000  | 0.000154000  |
| 6                                                                     | 4.659502000   | 0.228920000  | 0.000029000  | 6                                                | -5.619506000 | -0.851453000 | 0.000001000  |
| 6                                                                     | 3.978295000   | -1.007252000 | -0.000182000 | 6                                                | -4.784071000 | -1.989898000 | -0.000319000 |
| 6                                                                     | 2.590340000   | -1.057296000 | -0.000271000 | 6                                                | -3.402073000 | -1.866643000 | -0.000480000 |
| 1                                                                     | -0.143650000  | -0.793156000 | -0.000406000 | 1                                                | -0.725440000 | -1.251478000 | -0.000674000 |
| 1                                                                     | 2.075242000   | -2.020918000 | -0.000433000 | 1                                                | -2.767554000 | -2.756145000 | -0.000718000 |
| 1                                                                     | 4.541710000   | -1.939891000 | -0.000277000 | 1                                                | -5.237596000 | -2.983517000 | -0.000438000 |
| 1                                                                     | 4.386413000   | 2.389378000  | 0.000305000  | 1                                                | -5.618688000 | 1.331011000  | 0.000397000  |
| 8                                                                     | 1.835346000   | 2.542212000  | 0.000168000  | 8                                                | -3.116187000 | 1.800988000  | 0.000123000  |
| 8                                                                     | -0.046683000  | 3.721037000  | 0.000168000  | 8                                                | -1.401746000 | 3.212728000  | 0.000310000  |
| 6                                                                     | -6.426427000  | 0.003694000  | -0.000067000 | 6                                                | 5.403135000  | 0.345001000  | -0.000175000 |
| 6                                                                     | -7.438615000  | -0.919528000 | 0.000023000  | 6                                                | 6.525159000  | -0.440913000 | -0.000087000 |
| 6                                                                     | -7.176348000  | -2.325149000 | 0.000215000  | 6                                                | 6.445216000  | -1.868568000 | 0.000109000  |
| 7                                                                     | -6.924147000  | -3.463077000 | 0.000371000  | 7                                                | 6.340901000  | -3.029420000 | 0.000254000  |
| 6                                                                     | -8.843538000  | -0.429817000 | -0.000087000 | 6                                                | 7.855833000  | 0.224927000  | -0.000215000 |
| 8                                                                     | -9.163671000  | 0.740796000  | -0.000211000 | 8                                                | 8.023034000  | 1.426914000  | 0.000148000  |
| 8                                                                     | -9.737356000  | -1.441913000 | 0.000068000  | 8                                                | 8.871911000  | -0.664235000 | 0.000516000  |
| 1                                                                     | -10.617649000 | -1.024068000 | 0.000019000  | 1                                                | 9.691500000  | -0.137164000 | 0.000852000  |
| 6                                                                     | -2.665314000  | 0.467038000  | -0.000016000 | 6                                                | 1.613611000  | 0.322124000  | -0.000156000 |
| 1                                                                     | -2.344218000  | -0.580175000 | 0.000155000  | 1                                                | 1.429592000  | -0.757630000 | 0.000014000  |
| 1                                                                     | -6.748085000  | 1.049784000  | -0.000215000 | 1                                                | 5.588091000  | 1.423675000  | -0.000324000 |
| 6                                                                     | -4.079461000  | 0.705607000  | -0.000091000 | 6                                                | 2.985539000  | 0.740243000  | -0.000222000 |
| 6                                                                     | -5.026435000  | -0.280229000 | 0.000014000  | 6                                                | 4.050967000  | -0.116065000 | -0.000108000 |
| 1                                                                     | -4.408047000  | 1.751593000  | -0.000243000 | 1                                                | 3.177230000  | 1.819719000  | -0.000372000 |
| 1                                                                     | -4.713106000  | -1.329233000 | 0.000164000  | 1                                                | 3.874724000  | -1.196582000 | 0.000040000  |
| 6                                                                     | -1.749565000  | 1.474237000  | -0.000128000 | 6                                                | 0.576220000  | 1.203378000  | -0.000279000 |
| 1                                                                     | -2.104010000  | 2.508392000  | -0.000236000 | 1                                                | 0.794793000  | 2.274517000  | -0.000384000 |
| 6                                                                     | 6.173697000   | 0.335271000  | 0.000138000  | 6                                                | -7.133924000 | -1.004942000 | 0.000181000  |
| 1                                                                     | 6.472385000   | 0.938647000  | 0.877275000  | 1                                                | -7.343077000 | -2.088492000 | -0.000004000 |
| 1                                                                     | 6.472491000   | 0.938941000  | -0.876761000 | 6                                                | -7.767453000 | -0.409206000 | -1.270198000 |
| 6                                                                     | 6.966226000   | -0.974222000 | -0.000033000 | 6                                                | -7.767093000 | -0.409709000 | 1.270976000  |
| 1                                                                     | 6.690532000   | -1.577423000 | 0.883914000  | 1                                                | -7.337642000 | -0.856759000 | 2.181293000  |



|                                              |              |              |              |                                           |              |              |              |
|----------------------------------------------|--------------|--------------|--------------|-------------------------------------------|--------------|--------------|--------------|
| 1                                            | 6.690625000  | -1.577135000 | -0.884205000 | 1                                         | -7.611445000 | 0.680534000  | 1.325374000  |
| 6                                            | 8.481828000  | -0.746048000 | 0.000086000  | 1                                         | -8.854047000 | -0.591687000 | 1.280056000  |
| 1                                            | 8.760481000  | -0.139988000 | 0.882801000  | 1                                         | -7.611825000 | 0.681059000  | -1.324208000 |
| 1                                            | 8.760576000  | -0.139700000 | -0.882401000 | 1                                         | -8.854409000 | -0.591184000 | -1.279042000 |
| 6                                            | 9.296222000  | -2.044051000 | -0.000082000 | 1                                         | -7.338259000 | -0.855893000 | -2.180814000 |
| 1                                            | 9.016026000  | -2.648781000 | 0.882166000  |                                           |              |              |              |
| 1                                            | 9.016122000  | -2.648493000 | -0.882557000 |                                           |              |              |              |
| 6                                            | 10.808260000 | -1.808722000 | 0.000039000  |                                           |              |              |              |
| 1                                            | 11.124508000 | -1.237214000 | 0.889291000  |                                           |              |              |              |
| 1                                            | 11.124605000 | -1.236925000 | -0.888992000 |                                           |              |              |              |
| 1                                            | 11.364687000 | -2.759580000 | -0.000085000 |                                           |              |              |              |
| D6-t-but<br>E(RB3LYP) = -1167.38696880 a. u. |              |              |              | D6-OH<br>E(RB3LYP) = -1085.35885521 a. u. |              |              |              |
| 6                                            | -1.352931000 | 2.213410000  | -0.000209000 | 6                                         | 2.576676000  | 1.984281000  | 0.000204000  |
| 6                                            | -0.481001000 | 1.016251000  | -0.000090000 | 6                                         | 1.655919000  | 0.828833000  | -0.000151000 |
| 6                                            | -1.055412000 | -0.229502000 | 0.000117000  | 6                                         | 2.177803000  | -0.442099000 | -0.000435000 |
| 6                                            | -2.474643000 | -0.403216000 | 0.000088000  | 6                                         | 3.584027000  | -0.681682000 | -0.000294000 |
| 6                                            | -3.281614000 | 0.750092000  | -0.000046000 | 6                                         | 4.443203000  | 0.439364000  | 0.000148000  |
| 6                                            | -4.676784000 | 0.672668000  | -0.000065000 | 6                                         | 5.830414000  | 0.299531000  | 0.000318000  |
| 6                                            | -5.319302000 | -0.569600000 | 0.000054000  | 6                                         | 6.382708000  | -0.985500000 | 0.000041000  |
| 6                                            | -4.510510000 | -1.734495000 | 0.000178000  | 6                                         | 5.548722000  | -2.125683000 | -0.000411000 |
| 6                                            | -3.128453000 | -1.656144000 | 0.000201000  | 6                                         | 4.175615000  | -1.967694000 | -0.000577000 |
| 1                                            | -0.427729000 | -1.124442000 | 0.000274000  | 1                                         | 1.510155000  | -1.307625000 | -0.000811000 |
| 1                                            | -2.525021000 | -2.567061000 | 0.000305000  | 1                                         | 3.526095000  | -2.845910000 | -0.000924000 |
| 1                                            | -4.979630000 | -2.719108000 | 0.000258000  | 1                                         | 6.012915000  | -3.112201000 | -0.000620000 |
| 1                                            | -5.227733000 | 1.611241000  | -0.000176000 | 1                                         | 6.453358000  | 1.196421000  | 0.000658000  |
| 8                                            | -2.726911000 | 1.996540000  | -0.000159000 | 8                                         | 3.945533000  | 1.705093000  | 0.000413000  |
| 8                                            | -0.971872000 | 3.358411000  | -0.000075000 | 8                                         | 2.255137000  | 3.146724000  | 0.000370000  |
| 6                                            | 5.745732000  | 0.290238000  | 0.000034000  | 6                                         | -4.596050000 | 0.374119000  | -0.000126000 |
| 6                                            | 6.844281000  | -0.528282000 | -0.000037000 | 6                                         | -5.731169000 | -0.393557000 | 0.000071000  |
| 6                                            | 6.722422000  | -1.952963000 | -0.000203000 | 6                                         | -5.674355000 | -1.822233000 | 0.000492000  |
| 7                                            | 6.584116000  | -3.110266000 | -0.000339000 | 7                                         | -5.587551000 | -2.984578000 | 0.000836000  |
| 6                                            | 8.193862000  | 0.098126000  | 0.000065000  | 6                                         | -7.050309000 | 0.293630000  | -0.000169000 |
| 8                                            | 8.396457000  | 1.294683000  | 0.000278000  | 8                                         | -7.198571000 | 1.498294000  | -0.000543000 |
| 8                                            | 9.183449000  | -0.820509000 | 0.000061000  | 8                                         | -8.081295000 | -0.578656000 | 0.000049000  |
| 1                                            | 10.018093000 | -0.317630000 | 0.000193000  | 1                                         | -8.891618000 | -0.037512000 | -0.000142000 |
| 6                                            | 1.957205000  | 0.379196000  | -0.000044000 | 6                                         | -0.807626000 | 0.295066000  | -0.000006000 |
| 1                                            | 1.741318000  | -0.694649000 | -0.000192000 | 1                                         | -0.638729000 | -0.787212000 | 0.000363000  |

|                                                         |              |              |              |                                                                       |              |              |              |
|---------------------------------------------------------|--------------|--------------|--------------|-----------------------------------------------------------------------|--------------|--------------|--------------|
| 1                                                       | 5.962291000  | 1.363017000  | 0.000164000  | 1                                                                     | -4.763870000 | 1.455622000  | -0.000452000 |
| 6                                                       | 3.340855000  | 0.756500000  | 0.000032000  | 6                                                                     | -2.172899000 | 0.732284000  | -0.000174000 |
| 6                                                       | 4.380665000  | -0.130829000 | -0.000049000 | 6                                                                     | -3.251797000 | -0.107767000 | 0.000056000  |
| 1                                                       | 3.564338000  | 1.829860000  | 0.000165000  | 1                                                                     | -2.348907000 | 1.814485000  | -0.000513000 |
| 1                                                       | 4.172672000  | -1.205687000 | -0.000180000 | 1                                                                     | -3.092148000 | -1.190853000 | 0.000388000  |
| 6                                                       | 0.946345000  | 1.290876000  | 0.000043000  | 6                                                                     | 0.242264000  | 1.162301000  | -0.000246000 |
| 1                                                       | 1.196767000  | 2.355027000  | 0.000131000  | 1                                                                     | 0.036228000  | 2.236026000  | -0.000483000 |
| 6                                                       | -6.851971000 | -0.702614000 | 0.000005000  | 8                                                                     | 7.719643000  | -1.205481000 | 0.000179000  |
| 6                                                       | -7.556758000 | 0.665611000  | -0.000316000 | 1                                                                     | 8.186921000  | -0.356149000 | 0.000505000  |
| 1                                                       | -7.303379000 | 1.259649000  | 0.891744000  |                                                                       |              |              |              |
| 1                                                       | -7.303364000 | 1.259241000  | -0.892643000 |                                                                       |              |              |              |
| 1                                                       | -8.648039000 | 0.519115000  | -0.000295000 |                                                                       |              |              |              |
| 6                                                       | -7.294800000 | -1.478475000 | -1.263046000 |                                                                       |              |              |              |
| 1                                                       | -6.993781000 | -0.946873000 | -2.179912000 |                                                                       |              |              |              |
| 1                                                       | -6.860124000 | -2.489074000 | -1.301041000 |                                                                       |              |              |              |
| 1                                                       | -8.391737000 | -1.586588000 | -1.275835000 |                                                                       |              |              |              |
| 6                                                       | -7.294945000 | -1.477950000 | 1.263329000  |                                                                       |              |              |              |
| 1                                                       | -8.391888000 | -1.586009000 | 1.276062000  |                                                                       |              |              |              |
| 1                                                       | -6.860322000 | -2.488554000 | 1.301771000  |                                                                       |              |              |              |
| 1                                                       | -6.993986000 | -0.945992000 | 2.180008000  |                                                                       |              |              |              |
| D6-OCH <sub>3</sub><br>E(RB3LYP) = -1124.65952465 a. u. |              |              |              | D6-OC <sub>2</sub> H <sub>5</sub><br>E(RB3LYP) = -1163.97984340 a. u. |              |              |              |
| 6                                                       | 2.091174000  | 2.184269000  | -0.000162000 | 6                                                                     | -1.595204000 | 2.290727000  | 0.000148000  |
| 6                                                       | 1.213618000  | 0.993348000  | 0.000103000  | 6                                                                     | -0.745217000 | 1.080114000  | -0.000115000 |
| 6                                                       | 1.782930000  | -0.256272000 | 0.000309000  | 6                                                                     | -1.343265000 | -0.156241000 | -0.000363000 |
| 6                                                       | 3.197944000  | -0.439974000 | 0.000203000  | 6                                                                     | -2.761728000 | -0.307599000 | -0.000309000 |
| 6                                                       | 4.016984000  | 0.715025000  | -0.000121000 | 6                                                                     | -3.554348000 | 0.865676000  | -0.000006000 |
| 6                                                       | 5.402463000  | 0.627412000  | -0.000242000 | 6                                                                     | -4.941376000 | 0.809026000  | 0.000085000  |
| 6                                                       | 6.011202000  | -0.636875000 | -0.000040000 | 6                                                                     | -5.580352000 | -0.440696000 | -0.000139000 |
| 6                                                       | 5.220092000  | -1.808107000 | 0.000290000  | 6                                                                     | -4.814609000 | -1.629665000 | -0.000453000 |
| 6                                                       | 3.836852000  | -1.697228000 | 0.000410000  | 6                                                                     | -3.429496000 | -1.549965000 | -0.000534000 |
| 1                                                       | 1.149609000  | -1.147281000 | 0.000586000  | 1                                                                     | -0.730309000 | -1.061387000 | -0.000629000 |
| 1                                                       | 3.222383000  | -2.600434000 | 0.000664000  | 1                                                                     | -2.835605000 | -2.466879000 | -0.000778000 |
| 1                                                       | 5.680488000  | -2.794490000 | 0.000451000  | 1                                                                     | -5.296595000 | -2.605526000 | -0.000644000 |
| 1                                                       | 6.013706000  | 1.529333000  | -0.000490000 | 1                                                                     | -5.531638000 | 1.724834000  | 0.000325000  |
| 8                                                       | 3.466681000  | 1.961744000  | -0.000317000 | 8                                                                     | -2.975921000 | 2.099508000  | 0.000205000  |
| 8                                                       | 1.719284000  | 3.331932000  | -0.000247000 | 8                                                                     | -1.197573000 | 3.429692000  | 0.000304000  |
| 6                                                       | -5.016118000 | 0.299434000  | 0.000104000  | 6                                                                     | 5.466623000  | 0.241703000  | 0.000026000  |
| 6                                                       | -6.120902000 | -0.511590000 | -0.000040000 | 6                                                                     | 6.552549000  | -0.594563000 | 0.000151000  |

|                                                        |              |              |              |                                                                         |              |              |              |
|--------------------------------------------------------|--------------|--------------|--------------|-------------------------------------------------------------------------|--------------|--------------|--------------|
| 6                                                      | -6.008712000 | -1.936969000 | -0.000353000 | 6                                                                       | 6.407455000  | -2.016954000 | 0.000361000  |
| 7                                                      | -5.876748000 | -3.095082000 | -0.000609000 | 7                                                                       | 6.250132000  | -3.171907000 | 0.000536000  |
| 6                                                      | -7.465499000 | 0.123844000  | 0.000143000  | 6                                                                       | 7.911291000  | 0.009648000  | 0.000068000  |
| 8                                                      | -7.660670000 | 1.321843000  | 0.000391000  | 8                                                                       | 8.134303000  | 1.202824000  | -0.000364000 |
| 8                                                      | -8.462094000 | -0.787764000 | -0.000054000 | 8                                                                       | 8.886697000  | -0.924730000 | -0.000088000 |
| 1                                                      | -9.292571000 | -0.278110000 | 0.000065000  | 1                                                                       | 9.728598000  | -0.434195000 | -0.000361000 |
| 6                                                      | -1.227649000 | 0.366272000  | 0.000006000  | 6                                                                       | 1.680853000  | 0.396708000  | 0.000016000  |
| 1                                                      | -1.017471000 | -0.708764000 | -0.000267000 | 1                                                                       | 1.445564000  | -0.673060000 | 0.000206000  |
| 1                                                      | -5.225600000 | 1.373649000  | 0.000348000  | 1                                                                       | 5.700907000  | 1.310786000  | -0.000135000 |
| 6                                                      | -2.608458000 | 0.750842000  | 0.000135000  | 6                                                                       | 3.070169000  | 0.748897000  | -0.000041000 |
| 6                                                      | -3.654455000 | -0.130095000 | -0.000033000 | 6                                                                       | 4.095493000  | -0.156127000 | 0.000095000  |
| 1                                                      | -2.825831000 | 1.825503000  | 0.000386000  | 1                                                                       | 3.312654000  | 1.818207000  | -0.000207000 |
| 1                                                      | -3.453130000 | -1.206217000 | -0.000280000 | 1                                                                       | 3.869204000  | -1.227283000 | 0.000259000  |
| 6                                                      | -0.211416000 | 1.272955000  | 0.000180000  | 6                                                                       | 0.685876000  | 1.326782000  | -0.000129000 |
| 1                                                      | -0.457805000 | 2.338151000  | 0.000356000  | 1                                                                       | 0.956846000  | 2.385984000  | -0.000232000 |
| 8                                                      | 7.364550000  | -0.628465000 | -0.000181000 | 8                                                                       | -6.931670000 | -0.401705000 | -0.000059000 |
| 6                                                      | 8.061951000  | -1.869818000 | 0.000024000  | 6                                                                       | -7.675725000 | -1.628628000 | 0.000076000  |
| 1                                                      | 7.830728000  | -2.463577000 | 0.901069000  | 1                                                                       | -7.411336000 | -2.220915000 | 0.894638000  |
| 1                                                      | 7.830558000  | -2.463969000 | -0.900720000 | 1                                                                       | -7.411853000 | -2.220801000 | -0.894716000 |
| 1                                                      | 9.128181000  | -1.611377000 | -0.000133000 | 6                                                                       | -9.147278000 | -1.263742000 | 0.000513000  |
|                                                        |              |              |              | 1                                                                       | -9.401732000 | -0.671961000 | -0.891975000 |
|                                                        |              |              |              | 1                                                                       | -9.401252000 | -0.672137000 | 0.893253000  |
|                                                        |              |              |              | 1                                                                       | -9.761326000 | -2.177646000 | 0.000585000  |
| D6-NH <sub>2</sub><br>E(RB3LYP) = -1065.49481684 a. u. |              |              |              | D6-N(CH <sub>3</sub> ) <sub>2</sub><br>E(RB3LYP) = -1144.10660149 a. u. |              |              |              |
| 6                                                      | -2.567033000 | 1.987873000  | 0.000252000  | 6                                                                       | 1.715480000  | 2.148615000  | 0.000044000  |
| 6                                                      | -1.648635000 | 0.832351000  | -0.001747000 | 6                                                                       | 0.833657000  | 0.965080000  | 0.000030000  |
| 6                                                      | -2.174755000 | -0.439612000 | -0.003076000 | 6                                                                       | 1.400361000  | -0.290614000 | 0.000023000  |
| 6                                                      | -3.577139000 | -0.675716000 | -0.003545000 | 6                                                                       | 2.808019000  | -0.480419000 | 0.000038000  |
| 6                                                      | -4.439581000 | 0.446636000  | -0.003231000 | 6                                                                       | 3.636139000  | 0.666493000  | 0.000077000  |
| 6                                                      | -5.822727000 | 0.312429000  | -0.001232000 | 6                                                                       | 5.021707000  | 0.582675000  | 0.000063000  |
| 6                                                      | -6.397902000 | -0.971867000 | -0.001176000 | 6                                                                       | 5.656259000  | -0.683252000 | 0.000028000  |
| 6                                                      | -5.547272000 | -2.111320000 | -0.001446000 | 6                                                                       | 4.829110000  | -1.849859000 | -0.000027000 |
| 6                                                      | -4.175392000 | -1.958669000 | -0.002441000 | 6                                                                       | 3.453666000  | -1.739359000 | -0.000017000 |
| 1                                                      | -1.507914000 | -1.305963000 | -0.003875000 | 1                                                                       | 0.761412000  | -1.177774000 | -0.000002000 |
| 1                                                      | -3.529895000 | -2.840101000 | -0.000893000 | 1                                                                       | 2.840876000  | -2.644010000 | -0.000063000 |
| 1                                                      | -5.990049000 | -3.109773000 | -0.004329000 | 1                                                                       | 5.278059000  | -2.840812000 | -0.000097000 |
| 1                                                      | -6.439807000 | 1.212348000  | -0.002174000 | 1                                                                       | 5.581847000  | 1.514573000  | 0.000096000  |
| 8                                                      | -3.936566000 | 1.711586000  | -0.001076000 | 8                                                                       | 3.092391000  | 1.916340000  | 0.000138000  |

|                                                          |              |              |              |                                                          |              |              |              |
|----------------------------------------------------------|--------------|--------------|--------------|----------------------------------------------------------|--------------|--------------|--------------|
| 8                                                        | -2.244482000 | 3.150774000  | 0.003166000  | 8                                                        | 1.355920000  | 3.301121000  | 0.000009000  |
| 6                                                        | 4.600972000  | 0.367664000  | -0.000008000 | 6                                                        | -5.397493000 | 0.306177000  | -0.000033000 |
| 6                                                        | 5.738998000  | -0.397658000 | 0.000691000  | 6                                                        | -6.513200000 | -0.492243000 | -0.000010000 |
| 6                                                        | 5.685211000  | -1.826263000 | 0.000586000  | 6                                                        | -6.417616000 | -1.918563000 | 0.000044000  |
| 7                                                        | 5.600891000  | -2.988921000 | 0.000563000  | 7                                                        | -6.299306000 | -3.078317000 | 0.000093000  |
| 6                                                        | 7.055335000  | 0.291921000  | 0.001738000  | 6                                                        | -7.848563000 | 0.158288000  | -0.000046000 |
| 8                                                        | 7.202732000  | 1.497121000  | 0.002125000  | 8                                                        | -8.032003000 | 1.358738000  | -0.000095000 |
| 8                                                        | 8.089626000  | -0.577709000 | 0.002217000  | 8                                                        | -8.857596000 | -0.741082000 | -0.000021000 |
| 1                                                        | 8.897285000  | -0.032749000 | 0.002808000  | 1                                                        | -9.680215000 | -0.219050000 | -0.000049000 |
| 6                                                        | 0.813588000  | 0.290070000  | -0.001967000 | 6                                                        | -1.610060000 | 0.344324000  | 0.000009000  |
| 1                                                        | 0.642435000  | -0.791846000 | -0.003037000 | 1                                                        | -1.404919000 | -0.731656000 | 0.000047000  |
| 1                                                        | 4.767195000  | 1.449467000  | 0.000335000  | 1                                                        | -5.595685000 | 1.382606000  | -0.000076000 |
| 6                                                        | 2.178049000  | 0.724942000  | -0.001160000 | 6                                                        | -2.986637000 | 0.736434000  | -0.000024000 |
| 6                                                        | 3.258473000  | -0.114981000 | -0.001063000 | 6                                                        | -4.041795000 | -0.135914000 | -0.000002000 |
| 1                                                        | 2.355005000  | 1.807117000  | -0.000436000 | 1                                                        | -3.196844000 | 1.812702000  | -0.000073000 |
| 1                                                        | 3.099162000  | -1.198114000 | -0.001713000 | 1                                                        | -3.849823000 | -1.213737000 | 0.000041000  |
| 6                                                        | -0.235848000 | 1.159880000  | -0.001326000 | 6                                                        | -0.587786000 | 1.246946000  | 0.000002000  |
| 1                                                        | -0.026096000 | 2.233052000  | -0.000208000 | 1                                                        | -0.831738000 | 2.312931000  | -0.000025000 |
| 7                                                        | -7.763935000 | -1.128587000 | -0.050677000 | 7                                                        | 7.024347000  | -0.787153000 | 0.000041000  |
| 1                                                        | -8.338890000 | -0.335318000 | 0.207162000  | 6                                                        | 7.665551000  | -2.092913000 | -0.000028000 |
| 1                                                        | -8.143668000 | -2.025801000 | 0.226614000  | 1                                                        | 7.396781000  | -2.684386000 | 0.893220000  |
|                                                          |              |              |              | 1                                                        | 7.397277000  | -2.684111000 | -0.893620000 |
|                                                          |              |              |              | 1                                                        | 8.753691000  | -1.957340000 | 0.000312000  |
|                                                          |              |              |              | 6                                                        | 7.846220000  | 0.412978000  | -0.000192000 |
|                                                          |              |              |              | 1                                                        | 8.904309000  | 0.125306000  | -0.000249000 |
|                                                          |              |              |              | 1                                                        | 7.660853000  | 1.036320000  | -0.892954000 |
|                                                          |              |              |              | 1                                                        | 7.661016000  | 1.036544000  | 0.892445000  |
| D5-PhCH <sub>3</sub><br>E(RB3LYP) = -1280.51898449 a. u. |              |              |              | D5-PhNH <sub>2</sub><br>E(RB3LYP) = -1296.56297716 a. u. |              |              |              |
| 6                                                        | 0.361398000  | 2.289071000  | -0.140138000 | 6                                                        | 0.366582000  | 2.287305000  | -0.133333000 |
| 6                                                        | -0.483619000 | 1.075327000  | -0.061296000 | 6                                                        | -0.477529000 | 1.073955000  | -0.057588000 |
| 6                                                        | 0.118757000  | -0.155213000 | 0.018884000  | 6                                                        | 0.126426000  | -0.157595000 | 0.019750000  |
| 6                                                        | 1.540452000  | -0.297918000 | 0.026933000  | 6                                                        | 1.545956000  | -0.299886000 | 0.027709000  |
| 6                                                        | 2.323317000  | 0.873835000  | -0.044756000 | 6                                                        | 2.329968000  | 0.872321000  | -0.039793000 |
| 6                                                        | 3.715621000  | 0.824796000  | -0.046603000 | 6                                                        | 3.721127000  | 0.824281000  | -0.043076000 |
| 6                                                        | 4.379850000  | -0.409758000 | 0.026672000  | 6                                                        | 4.391023000  | -0.409650000 | 0.027735000  |
| 6                                                        | 3.600477000  | -1.591917000 | 0.100794000  | 6                                                        | 3.607829000  | -1.592170000 | 0.098716000  |
| 6                                                        | 2.217017000  | -1.536426000 | 0.101016000  | 6                                                        | 2.225418000  | -1.537931000 | 0.097609000  |
| 1                                                        | -0.488732000 | -1.062031000 | 0.077717000  | 1                                                        | -0.481283000 | -1.064509000 | 0.076046000  |

|   |               |              |              |   |               |              |              |
|---|---------------|--------------|--------------|---|---------------|--------------|--------------|
| 1 | 1.629742000   | -2.455181000 | 0.169000000  | 1 | 1.639378000   | -2.457750000 | 0.163269000  |
| 1 | 4.099061000   | -2.557972000 | 0.187499000  | 1 | 4.104074000   | -2.559218000 | 0.186383000  |
| 1 | 4.264322000   | 1.762718000  | -0.132821000 | 1 | 4.265816000   | 1.764312000  | -0.130052000 |
| 8 | 1.739468000   | 2.104493000  | -0.126491000 | 8 | 1.745019000   | 2.103158000  | -0.118600000 |
| 8 | -0.045641000  | 3.422618000  | -0.214431000 | 8 | -0.039770000  | 3.421693000  | -0.205918000 |
| 6 | -6.692208000  | 0.214132000  | -0.013724000 | 6 | -6.685276000  | 0.213201000  | -0.014091000 |
| 6 | -7.772994000  | -0.626282000 | 0.037165000  | 6 | -7.769177000  | -0.624374000 | 0.034318000  |
| 6 | -7.620736000  | -2.045282000 | 0.125094000  | 6 | -7.621107000  | -2.043887000 | 0.119274000  |
| 7 | -7.456743000  | -3.197016000 | 0.196570000  | 7 | -7.460696000  | -3.196348000 | 0.188296000  |
| 6 | -9.135685000  | -0.030181000 | -0.001169000 | 6 | -9.129329000  | -0.024518000 | -0.003607000 |
| 8 | -9.363841000  | 1.159486000  | -0.075007000 | 8 | -9.355128000  | 1.166009000  | -0.075168000 |
| 8 | -10.105405000 | -0.968043000 | 0.055692000  | 8 | -10.102646000 | -0.959502000 | 0.050724000  |
| 1 | -10.950594000 | -0.484085000 | 0.024799000  | 1 | -10.945597000 | -0.471739000 | 0.020270000  |
| 6 | -2.906730000  | 0.385003000  | -0.020535000 | 6 | -2.900229000  | 0.380426000  | -0.018731000 |
| 1 | -2.667362000  | -0.681823000 | 0.045825000  | 1 | -2.660473000  | -0.686419000 | 0.045625000  |
| 1 | -6.931739000  | 1.279958000  | -0.080036000 | 1 | -6.922263000  | 1.279758000  | -0.078288000 |
| 6 | -4.297952000  | 0.731367000  | -0.043368000 | 6 | -4.290585000  | 0.726851000  | -0.041406000 |
| 6 | -5.318512000  | -0.176620000 | 0.011956000  | 6 | -5.313120000  | -0.180021000 | 0.011550000  |
| 1 | -4.544618000  | 1.797547000  | -0.109811000 | 1 | -4.536637000  | 1.793380000  | -0.105788000 |
| 1 | -5.087364000  | -1.244664000 | 0.078481000  | 1 | -5.083563000  | -1.248527000 | 0.076014000  |
| 6 | -1.915929000  | 1.317191000  | -0.077711000 | 6 | -1.909095000  | 1.313412000  | -0.073750000 |
| 1 | -2.190150000  | 2.373382000  | -0.144244000 | 1 | -2.184688000  | 2.369476000  | -0.138198000 |
| 6 | 8.708519000   | -0.593212000 | 0.026573000  | 6 | 8.718676000   | -0.591807000 | 0.027502000  |
| 6 | 8.025168000   | 0.464117000  | 0.650674000  | 6 | 8.037332000   | 0.506395000  | 0.591303000  |
| 6 | 7.940020000   | -1.587584000 | -0.594597000 | 6 | 7.947365000   | -1.629312000 | -0.534727000 |
| 1 | 8.594909000   | 1.250506000  | 1.153300000  | 1 | 8.609759000   | 1.318198000  | 1.047782000  |
| 1 | 8.441619000   | -2.418878000 | -1.096792000 | 1 | 8.449142000   | -2.488229000 | -0.988237000 |
| 6 | 6.633994000   | 0.526828000  | 0.650752000  | 6 | 6.648713000   | 0.560807000  | 0.586533000  |
| 6 | 6.545300000   | -1.533350000 | -0.593169000 | 6 | 6.558692000   | -1.568123000 | -0.526322000 |
| 1 | 6.137440000   | 1.350739000  | 1.167394000  | 1 | 6.158594000   | 1.417595000  | 1.053069000  |
| 1 | 5.982419000   | -2.313225000 | -1.110106000 | 1 | 5.998606000   | -2.378681000 | -0.996743000 |
| 6 | 5.861391000   | -0.473384000 | 0.028075000  | 6 | 5.867609000   | -0.472880000 | 0.030594000  |
| 6 | 10.216372000  | -0.645618000 | 0.028870000  | 7 | 10.102713000  | -0.676976000 | 0.079622000  |
| 1 | 10.614514000  | -0.640136000 | 1.057350000  | 1 | 10.597230000  | 0.204280000  | 0.171886000  |
| 1 | 10.590829000  | -1.549458000 | -0.473485000 | 1 | 10.534377000  | -1.290326000 | -0.603793000 |
| 1 | 10.646528000  | 0.229766000  | -0.486512000 |   |               |              |              |
